# Supplementary material for: Assessing rates and predictors of cannabis-associated psychotic symptoms across observational, experimental and medical research
Source: Nat Ment Health. 2024 Jun 3;2(7):865–76. doi: 10.1038/s44220-024-00261-x (PMC11236708; doi:10.1038/s44220-024-00261-x)
Supplement: Supplementary file 3 — Supplementary Tables 1–5. [file 44220_2024_261_MOESM3_ESM.xlsx]

## Sheet: Table 1
	Table 1. Conditions treated with medicinal cannabis products containing THC
	Condition treated with medicinal cannabis product	Number of studies	% studies per condition	number of non-overlapping included individuals
	Autism	2	2.5	93
	Cancer	16	20	1978
	CINV	1	1.25	7
	Fibromyalgia	1	1.25	101
	Healthy	1	1.25	33
	HIV	1	1.25	5
	Inflammatory bowel disease	1	1.25	236
	Insomnia	1	1.25	24
	MedicalTrial	1	1.25	11
	Mixed	10	12.5	8746
	MS	13	16.25	2339
	Pain	19	23.75	8794
	Parkinson	3	3.75	116
	PTSD	3	3.75	144
	Spasticity	3	3.75	10057
	Tourette	3	3.75	51
	Tourette syndrome	1	1.25	86

## Sheet: Table 2
	Table 2. Overview of individual studies assessing rates of cannabis-associated psychotic symptoms
	Note. All questionnaires included in the column 'Measure' are listed with their corresponding reference in the Supplement.
	Study authors	Study design	Symptom profile of CAPS	Measure	Mean age of study participants	Sample size	Severity of CAPS	% rate CAPS (95% Confidennce Interval)	p-value (rate of CAPS)	Reference (full)
	Thomas et al. (1996)	Observational study	Cannabis-associated psychosis-like symptoms	Single item (after taking cannabis, have you had strange, unpleasant experiences such as hearing voices or becoming convinced that someone is trying to harm you, or that you are being persecuted?)	27	200	Psychosis-like	15 (10.355; 20.716)	2.835e-09	Thomas, Huw. "A community survey of adverse effects of cannabis use." Drug and alcohol dependence 42, no. 3 (1996): 201-207.
	Sexton et al. (2019)	Observational study	Cannabis-associated paranoia	Single item (acute effects of cannabis (paranoia))	34.96	2878	Psychosis-like	14.5 (13.233; 15.84)	3.725e-108	Sexton, Michelle, Carrie Cuttler, and Laurie K. Mischley. "A survey of cannabis acute effects and withdrawal symptoms: Differential responses across user types and age." The Journal of Alternative and Complementary Medicine 25, no. 3 (2019): 326-335.
	Sexton et al. (2019)	Observational study	Cannabis-associated hallucinations	Single item (acute effects of cannabis (hallucinations))	34.96	2878	Psychosis-like	3.8 (3.131; 4.564)	1.528e-26	Sexton, Michelle, Carrie Cuttler, and Laurie K. Mischley. "A survey of cannabis acute effects and withdrawal symptoms: Differential responses across user types and age." The Journal of Alternative and Complementary Medicine 25, no. 3 (2019): 326-335.
	Arendt et al. (2007)	Observational study	Cannabis-associated delusions	Delusions (total score)	22.3	119	Psychosis-like	44.5 (35.391; 53.89)	1.544e-22	Arendt, Mikkel, Raben Rosenberg, Lone Fjordback, Jack Brandholdt, Leslie Foldager, Leo Sher, and Povl Munk-Jørgensen. "Testing the self-medication hypothesis of depression and aggression in cannabis-dependent subjects." Psychological medicine 37, no. 7 (2007): 935-945.
	Arendt et al. (2007)	Observational study	Cannabis-associated paranoia	Paranoia (total score)	22.3	119	Psychosis-like	24.4 (16.994; 33.121)	5.741e-10	Arendt, Mikkel, Raben Rosenberg, Lone Fjordback, Jack Brandholdt, Leslie Foldager, Leo Sher, and Povl Munk-Jørgensen. "Testing the self-medication hypothesis of depression and aggression in cannabis-dependent subjects." Psychological medicine 37, no. 7 (2007): 935-945.
	Arendt et al. (2007)	Observational study	Cannabis-associated hallucinations	Hallucinations (total score)	22.3	119	Psychosis-like	5 (1.847; 10.596)	0.01233	Arendt, Mikkel, Raben Rosenberg, Lone Fjordback, Jack Brandholdt, Leslie Foldager, Leo Sher, and Povl Munk-Jørgensen. "Testing the self-medication hypothesis of depression and aggression in cannabis-dependent subjects." Psychological medicine 37, no. 7 (2007): 935-945.
	Levy et al. (2018)	Observational study	Cannabis-associated hallucinations	Single item (in the past 12 months, how often have you seen, felt, or heard things that were not really there [ie, hallucinations] during or after using marijuana?)	16.6	146	Psychosis-like	27.397 (20.349; 35.387)	1.149e-13	Levy, Sharon, and Elissa R. Weitzman. "Acute Mental Health Symptoms in Adolescent Marijuana Users." JAMA pediatrics 173, no. 2 (2019): 185-186.
	Levy et al. (2018)	Observational study	Cannabis-associated paranoia	Single item (in the past 12 months, how often have you felt anxious or paranoid during or after using marijuana?)	16.6	146	Psychosis-like	33.562 (25.967; 41.839)	8.855e-18	Levy, Sharon, and Elissa R. Weitzman. "Acute Mental Health Symptoms in Adolescent Marijuana Users." JAMA pediatrics 173, no. 2 (2019): 185-186.
	Bianconi et al. (2016)	Observational study	Cannabis-associated paranoia	Single item (how often have you felt suspicious while smoking cannabis?)	28.5	130	Psychosis-like	46.154 (37.377; 55.11)	4.767e-26	Bianconi, F., M. Bonomo, A. Marconi, A. Kolliakou, S. A. Stilo, C. Iyegbe, P. Gurillo Muñoz et al. "Differences in cannabis-related experiences between patients with a first episode of psychosis and controls." Psychological medicine 46, no. 5 (2016): 995-1003.
	Bianconi et al. (2016)	Observational study	Cannabis-associated hallucinations	Single item (how often have your heard voices while smoking cannabis?)	28.5	129	Psychosis-like	10.078 (5.476; 16.616)	0.0001434	Bianconi, F., M. Bonomo, A. Marconi, A. Kolliakou, S. A. Stilo, C. Iyegbe, P. Gurillo Muñoz et al. "Differences in cannabis-related experiences between patients with a first episode of psychosis and controls." Psychological medicine 46, no. 5 (2016): 995-1003.
	Cuttler et al. (2016)	Observational study	Cannabis-associated paranoia	Single item (acute effects of cannabis (paranoia))	33.72	2374	Psychosis-like	14.796 (13.391; 16.289)	1.183e-91	Cuttler, Carrie, Laurie K. Mischley, and Michelle Sexton. "Sex differences in cannabis use and effects: a cross-sectional survey of cannabis users." Cannabis and cannabinoid research 1, no. 1 (2016): 166-175.
	Cuttler et al. (2016)	Observational study	Cannabis-associated hallucinations	Single item (acute effects of cannabis (hallucinations))	33.72	2374	Psychosis-like	3.746 (3.019; 4.59)	7.091e-22	Cuttler, Carrie, Laurie K. Mischley, and Michelle Sexton. "Sex differences in cannabis use and effects: a cross-sectional survey of cannabis users." Cannabis and cannabinoid research 1, no. 1 (2016): 166-175.
	Sami et al. (2018)	Observational study	Cannabis-associated paranoia	CEQ-Paranoia	29.5	1117	Psychosis-like	46.911 (43.951; 49.888)	1.185e-216	Sami, Musa, Caitlin Notley, Christos Kouimtsidis, Michael Lynskey, and Sagnik Bhattacharyya. "Psychotic-like experiences with cannabis use predict cannabis cessation and desire to quit: a cannabis discontinuation hypothesis." Psychological medicine 49, no. 1 (2019): 103-112.
	Sami et al. (2018)	Observational study	Cannabis-associated hallucinations	CEQ-Hallucinations	29.5	1117	Psychosis-like	8.953 (7.343; 10.782)	1.066e-25	Sami, Musa, Caitlin Notley, Christos Kouimtsidis, Michael Lynskey, and Sagnik Bhattacharyya. "Psychotic-like experiences with cannabis use predict cannabis cessation and desire to quit: a cannabis discontinuation hypothesis." Psychological medicine 49, no. 1 (2019): 103-112.
	Spindle2 et al. (2019)	Experiment	Cannabis-associated hallucinations	Acute reaction following THC administration	27.3	17	Psychosis-like	5.882 (0.149; 28.689)	0.3026	Spindle, Tory R., Edward J. Cone, Nicolas J. Schlienz, John M. Mitchell, George E. Bigelow, Ronald Flegel, Eugene Hayes, and Ryan Vandrey. "Acute pharmacokinetic profile of smoked and vaporized cannabis in human blood and oral fluid." Journal of analytical toxicology 43, no. 4 (2019): 233-258.
	Krebs et al. (2014)	Observational study	Cannabis-associated psychosis-like symptoms	CSE	19.8	544	Psychosis-like	10.846 (8.359; 13.766)	4.121e-16	Krebs, M. O., Y. Morvan, T. Jay, R. Gaillard, and O. Kebir. "Psychotomimetic effects at initiation of cannabis use are associated with cannabinoid receptor 1 (CNR1) variants in healthy students." Molecular psychiatry 19, no. 4 (2014): 402-403.
	Peters et al. (2009)	Observational study	Cannabis-associated hallucinations	Single item (what did you notice after using cannabis (voices))	22.8	52	Psychosis-like	2 (0.057; 10.38)	0.3029	Peters, Bart D., Pelle de Koning, Peter Dingemans, Hiske Becker, Don H. Linszen, and Lieuwe de Haan. "Subjective effects of cannabis before the first psychotic episode." Australian and New Zealand Journal of Psychiatry 43, no. 12 (2009): 1155-1162.
	Peters et al. (2009)	Observational study	Cannabis-associated paranoia	Single item (what did you notice after using cannabis (suspicion))	22.8	52	Psychosis-like	6 (1.309; 16.265)	0.06848	Peters, Bart D., Pelle de Koning, Peter Dingemans, Hiske Becker, Don H. Linszen, and Lieuwe de Haan. "Subjective effects of cannabis before the first psychotic episode." Australian and New Zealand Journal of Psychiatry 43, no. 12 (2009): 1155-1162.
	Green et al. (2004)	Observational study	Cannabis-associated paranoia	Single item (the last time you smoked cannabis, did you experience paranoia?)	30	47	Psychosis-like	8.5 (2.362; 20.365)	0.03666	Green, Bob, David Kavanagh, and Ross MCD Young. "Reasons for cannabis use in men with and without psychosis." Drug and alcohol review 23, no. 4 (2004): 445-453.
	Englund et al. (2013)	Experiment	Cannabis-associated psychosis-like symptoms	PANSS positive scores of ≥3 points	26	26	Psychosis-like	42.308 (23.352; 63.082)	1.262e-05	Englund, Amir, Paul D. Morrison, Judith Nottage, Dominic Hague, Fergus Kane, Stefania Bonaccorso, James M. Stone et al. "Cannabidiol inhibits THC-elicited paranoid symptoms and hippocampal-dependent memory impairment." Journal of psychopharmacology 27, no. 1 (2013): 19-27.
	Collin et al. (2010)	Medicinal cannabis study	Cannabis-associated hallucinations	Single item (reported adverse drug effect (hallucinations))	48	167	Adverse event	1.198 (0.145; 4.259)	0.1548	Collin, C., E. Ehler, G. Waberzinek, Z. Alsindi, P. Davies, K. Powell, W. Notcutt et al. "A double-blind, randomized, placebo-controlled, parallel-group study of Sativex, in subjects with symptoms of spasticity due to multiple sclerosis." Neurological research 32, no. 5 (2010): 451-459.
	Collin et al. (2010)	Medicinal cannabis study	Cannabis-associated paranoia	Single item (reported adverse drug effect (paranoia))	48	167	Adverse event	0.599 (0.015; 3.291)	0.3159	Collin, C., E. Ehler, G. Waberzinek, Z. Alsindi, P. Davies, K. Powell, W. Notcutt et al. "A double-blind, randomized, placebo-controlled, parallel-group study of Sativex, in subjects with symptoms of spasticity due to multiple sclerosis." Neurological research 32, no. 5 (2010): 451-459.
	Duran et al. (2010)	Medicinal cannabis study	Cannabis-associated hallucinations	Single item (reported adverse drug effect (psychosis))	50	7	Adverse event	14.286 (0.361; 57.872)	0.2801	Duran, Marta, Eulàlia Pérez, Sergio Abanades, Xavier Vidal, Cristina Saura, Margarita Majem, Edurne Arriola et al. "Preliminary efficacy and safety of an oromucosal standardized cannabis extract in chemotherapy‐induced nausea and vomiting." British journal of clinical pharmacology 70, no. 5 (2010): 656-663.
	Thaler et al. (2019)	Medicinal cannabis study	Cannabis-associated hallucinations	Single item (have any of the following ever occured when treated with cannabis: hallucinations)	34.5	42	Adverse event	9.524 (2.656; 22.622)	0.0355	Thaler, Avner, Shira Arad, Lihi Bar-Lev Schleider, Judith Knaani, Tali Taichman, Nir Giladi, and Tanya Gurevich. "Single center experience with medical cannabis in Gilles de la Tourette syndrome." Parkinsonism & related disorders 61 (2019): 211-213.
	Thaler et al. (2019)	Medicinal cannabis study	Cannabis-associated psychosis-like symptoms	Dropout due to psychotic episode	34.5	42	Full episode	2.381 (0.06; 12.566)	0.3115	Thaler, Avner, Shira Arad, Lihi Bar-Lev Schleider, Judith Knaani, Tali Taichman, Nir Giladi, and Tanya Gurevich. "Single center experience with medical cannabis in Gilles de la Tourette syndrome." Parkinsonism & related disorders 61 (2019): 211-213.
	Balash et al. (2017)	Medicinal cannabis study	Cannabis-associated hallucinations	Adverse effects of medicinal cannabis (hallucinations)	64.2	47	Adverse event	17.021 (7.647; 30.809)	0.001903	Balash, Yacov, Lihi Bar-Lev Schleider, Amos D. Korczyn, Herzel Shabtai, Judith Knaani, Alina Rosenberg, Yehuda Baruch, Ruth Djaldetti, Nir Giladi, and Tanya Gurevich. "Medical cannabis in Parkinson disease: Real-life patients' experience." Clinical neuropharmacology 40, no. 6 (2017): 268-272.
	Balash et al. (2017)	Medicinal cannabis study	Cannabis-associated psychosis-like symptoms	Single item (developed psychosis during trial)	64.2	47	Full episode	2.128 (0.054; 11.294)	0.3121	Balash, Yacov, Lihi Bar-Lev Schleider, Amos D. Korczyn, Herzel Shabtai, Judith Knaani, Alina Rosenberg, Yehuda Baruch, Ruth Djaldetti, Nir Giladi, and Tanya Gurevich. "Medical cannabis in Parkinson disease: Real-life patients' experience." Clinical neuropharmacology 40, no. 6 (2017): 268-272.
	Serpell et al. (2013)	Medicinal cannabis study	Cannabis-associated hallucinations	Adverse effects of medicinal cannabis (hallucinations)	50	139	Adverse event	0.719 (0.018; 3.943)	0.3156	Serpell, Michael G., William Notcutt, and Christine Collin. "Sativex long-term use: an open-label trial in patients with spasticity due to multiple sclerosis." Journal of neurology 260, no. 1 (2013): 285-295.
	Serpell et al. (2013)	Medicinal cannabis study	Cannabis-associated paranoia	Adverse effects of medicinal cannabis (paranoia)	50	139	Adverse event	0.719 (0.018; 3.943)	0.3156	Serpell, Michael G., William Notcutt, and Christine Collin. "Sativex long-term use: an open-label trial in patients with spasticity due to multiple sclerosis." Journal of neurology 260, no. 1 (2013): 285-295.
	Serpell et al. (2013)	Medicinal cannabis study	Cannabis-associated delusions	Adverse effects of medicinal cannabis (delusions)	50	139	Adverse event	0.719 (0.018; 3.943)	0.3156	Serpell, Michael G., William Notcutt, and Christine Collin. "Sativex long-term use: an open-label trial in patients with spasticity due to multiple sclerosis." Journal of neurology 260, no. 1 (2013): 285-295.
	Lichtman et al. (2018)	Medicinal cannabis study	Cannabis-associated hallucinations	Study withdrawal due to hallucinations	60	199	Adverse event	0.503 (0.013; 2.768)	0.3161	Lichtman, Aron H., Eberhard Albert Lux, Robert McQuade, Sandro Rossetti, Raymond Sanchez, Wei Sun, Stephen Wright, Elena Kornyeyeva, and Marie T. Fallon. "Results of a double-blind, randomized, placebo-controlled study of nabiximols oromucosal spray as an adjunctive therapy in advanced cancer patients with chronic uncontrolled pain." Journal of pain and symptom management 55, no. 2 (2018): 179-18…
	Abuhasira et al. (2018)	Medicinal cannabis study	Cannabis-associated hallucinations	Adverse effects of medicinal cannabis (hallucinations)	74.5	901	Adverse event	0.777 (0.313; 1.594)	0.007905	Abuhasira, R., Schleider, L. B.-L., Mechoulam, R. and Novack, V. (2018), ‘Epidemiological characteristics, safety and efficacy of medical cannabis in the elderly’, European Journal of Internal Medicine 49, pp. 44-50.
	Camera et al. (2012)	Observational study	Cannabis-associated hallucinations	Single item (experiences while under the influence of cannabis (hallucinations))	22.9	100	Psychosis-like	7 (2.861; 13.892)	0.006079	Camera, Ariella A., Veronica Tomaselli, Jerry Fleming, Gul A. Jabbar, Melissa Trachtenberg, Juan A. Galvez-Buccollini, Ashley C. Proal, Richard N. Rosenthal, and Lynn E. DeLisi. "Correlates to the variable effects of cannabis in young adults: a preliminary study." Harm reduction journal 9, no. 1 (2012): 15.
	Camera et al. (2012)	Observational study	Cannabis-associated paranoia	Single item (experiences while under the influence of cannabis (paranoia))	22.9	100	Psychosis-like	40 (30.329; 50.279)	3.215e-16	Camera, Ariella A., Veronica Tomaselli, Jerry Fleming, Gul A. Jabbar, Melissa Trachtenberg, Juan A. Galvez-Buccollini, Ashley C. Proal, Richard N. Rosenthal, and Lynn E. DeLisi. "Correlates to the variable effects of cannabis in young adults: a preliminary study." Harm reduction journal 9, no. 1 (2012): 15.
	Kaufmann et al. (2010)	Experiment	Cannabis-associated psychosis-like symptoms	BPRS (>84 cut-off)	23.6	16	Psychosis-like	6.25 (0.158; 30.232)	0.3017	Kaufmann RM, Kraft B, Frey R, et al. Acute psychotropic effects of oral cannabis extract with a defined content of Delta9-tetrahydrocannabinol (THC) in healthy volunteers. Pharmacopsychiatry. 2010;43(1):24‐32. doi:10.1055/s-0029-1237397
	Dalzell et al. (1986)	Medicinal cannabis study	Cannabis-associated hallucinations	Adverse effects of medicinal cannabis (hallucinations)	8	18	Adverse event	5.556 (0.141; 27.294)	0.3035	Dalzell, A. M., H. Bartlett, and J. S. Lilleyman. "Nabilone: an alternative antiemetic for cancer chemotherapy." Archives of disease in childhood 61, no. 5 (1986): 502-505.
	Laszilo et al. (1981)	Medicinal cannabis study	Cannabis-associated hallucinations	Adverse effects of medicinal cannabis (hallucinations)	40	35	Adverse event	31.429 (16.852; 49.288)	6.196e-05	LASZLO, JOHN, VIRGIL S. LUCAS JR, DEAN C. HANSON, CAROL M. CRONIN, and STEPHEN E. SALLAN. "Levonantradol for Chemotherapy‐Induced Emesis: Phase I—II Oral Administration." The Journal of Clinical Pharmacology 21, no. S1 (1981): 51S-56S.
	Jain et al. (1981)	Medicinal cannabis study	Cannabis-associated hallucinations	Adverse effects of medicinal cannabis (hallucinations)	28	40	Adverse event	7.5 (1.574; 20.386)	0.07172	JAIN, A.K., RYAN, J.R., McMAHON, F.G. and SMITH, G., 1981. Evaluation of intramuscular levonantradol and placebo in acute postoperative pain. The Journal of Clinical Pharmacology, 21(S1), pp.320S-326S.
	Herman et al. (1979)	Medicinal cannabis study	Cannabis-associated hallucinations	Adverse effects of medicinal cannabis (hallucinations)	33	113	Adverse event	2.655 (0.551; 7.563)	0.07917	Herman, Terence S., Lawrence H. Einhorn, Stephen E. Jones, Catherine Nagy, Aurelia B. Chester, Judith C. Dean, Becky Furnas et al. "Superiority of nabilone over prochlorperazine as an antiemetic in patients receiving cancer chemotherapy." New England Journal of Medicine 300, no. 23 (1979): 1295-1297.
	Crescioli et al. (2019)	Medicinal cannabis study	Cannabis-associated hallucinations	Adverse effects of medicinal cannabis (hallucinations)	61.9	53	Adverse event	3.774 (0.46; 12.976)	0.1494	Crescioli, Giada, Niccolò Lombardi, Alessandra Bettiol, Francesca Menniti‐Ippolito, Roberto Da Cas, Maria Parrilli, Martina Del Lungo et al. "Adverse events following cannabis for medical use in Tuscany: An analysis of the Italian Phytovigilance database." British Journal of Clinical Pharmacology 86, no. 1 (2020): 106-120.
	Milosev et al. (2019)	Medicinal cannabis study	Cannabis-associated hallucinations	Adverse effects of medicinal cannabis (hallucinations)	35.8	86	Adverse event	3.488 (0.725; 9.858)	0.07789	Milosev, Leonie M., Nikolas Psathakis, Natalia Szejko, Ewgeni Jakubovski, and Kirsten R. Müller-Vahl. "Treatment of Gilles de la Tourette Syndrome with Cannabis-Based Medicine: Results from a Retrospective Analysis and Online Survey." Cannabis and Cannabinoid Research 4, no. 4 (2019): 265-274.
	Kleinloog et al. (2014)	Experiment	Cannabis-associated paranoia	VAS (single item)		205	Psychosis-like	16.098 (11.347; 21.858)	3.576e-10	Kleinloog, Daniël, Frits Roozen, Willem De Winter, Jan Freijer, and Joop Van Gerven. "Profiling the subjective effects of Δ9‐tetrahydrocannabinol using visual analogue scales." International journal of methods in psychiatric research 23, no. 2 (2014): 245-256.
	Kleinloog et al. (2014)	Experiment	Cannabis-associated hallucinations	VAS (single item)		205	Psychosis-like	19.024 (13.892; 25.076)	3.923e-12	Kleinloog, Daniël, Frits Roozen, Willem De Winter, Jan Freijer, and Joop Van Gerven. "Profiling the subjective effects of Δ9‐tetrahydrocannabinol using visual analogue scales." International journal of methods in psychiatric research 23, no. 2 (2014): 245-256.
	Ware et al. (2015)	Medicinal cannabis study	Cannabis-associated paranoia	Adverse effects of medicinal cannabis (paranoia)	49	215	Adverse event	0.93 (0.113; 3.32)	0.1554	Ware, Mark A., Tongtong Wang, Stan Shapiro, Jean-Paul Collet, Aline Boulanger, John M. Esdaile, Allan Gordon, Mary Lynch, Dwight E. Moulin, and Colleen O'Connell. "Cannabis for the management of pain: assessment of safety study (COMPASS)." The Journal of Pain 16, no. 12 (2015): 1233-1242.
	Ware et al. (2015)	Medicinal cannabis study	Cannabis-associated hallucinations	Adverse effects of medicinal cannabis (hallucinations)	49	215	Adverse event	0.465 (0.012; 2.564)	0.3162	Ware, Mark A., Tongtong Wang, Stan Shapiro, Jean-Paul Collet, Aline Boulanger, John M. Esdaile, Allan Gordon, Mary Lynch, Dwight E. Moulin, and Colleen O'Connell. "Cannabis for the management of pain: assessment of safety study (COMPASS)." The Journal of Pain 16, no. 12 (2015): 1233-1242.
	Ganesh et al. (2020)	Experiment	Cannabis-associated delusions	PANSS (delusions)	25.3	239	Psychosis-like	4 (1.897; 7.327)	0.001601	Ganesh, Suhas, Jose Cortes-Briones, Mohini Ranganathan, Rajiv Radhakrishnan, Patrick D. Skosnik, and Deepak Cyril D’Souza. "Psychosis-relevant effects of intravenous delta-9-tetrahydrocannabinol-A mega analysis of individual participant-data from human laboratory studies." International Journal of Neuropsychopharmacology (2020).
	Ganesh et al. (2020)	Experiment	Cannabis-associated hallucinations	PANSS (hallucinations)	25.3	239	Psychosis-like	19 (14.23; 24.557)	7.023e-14	Ganesh, Suhas, Jose Cortes-Briones, Mohini Ranganathan, Rajiv Radhakrishnan, Patrick D. Skosnik, and Deepak Cyril D’Souza. "Psychosis-relevant effects of intravenous delta-9-tetrahydrocannabinol-A mega analysis of individual participant-data from human laboratory studies." International Journal of Neuropsychopharmacology (2020).
	Ganesh et al. (2020)	Experiment	Cannabis-associated paranoia	PANSS (paranoia)	25.3	239	Psychosis-like	2.5 (0.92; 5.37)	0.0133	Ganesh, Suhas, Jose Cortes-Briones, Mohini Ranganathan, Rajiv Radhakrishnan, Patrick D. Skosnik, and Deepak Cyril D’Souza. "Psychosis-relevant effects of intravenous delta-9-tetrahydrocannabinol-A mega analysis of individual participant-data from human laboratory studies." International Journal of Neuropsychopharmacology (2020).
	van Amerongen et al. (2018)	Experiment	Cannabis-associated hallucinations	TEAEs (Hallucinations)	24	23	Adverse event	13.043 (2.775; 33.589)	0.06325	van Amerongen, G., P. Siebenga, M. L. de Kam, J. L. Hay, and G. J. Groeneveld. "Effect profile of paracetamol, Δ9‐THC and promethazine using an evoked pain test battery in healthy subjects." European Journal of Pain 22, no. 7 (2018): 1331-1342.
	Patti et al. (2016)	Medicinal cannabis study	Cannabis-associated hallucinations	Dropout due to adverse event (hallucinations)	51	1615	Adverse event	0.186 (0.038; 0.542)	0.08298	Patti, Francesco, Silvia Messina, Claudio Solaro, Maria Pia Amato, Roberto Bergamaschi, Simona Bonavita, R. Bruno Bossio et al. "Efficacy and safety of cannabinoid oromucosal spray for multiple sclerosis spasticity." Journal of Neurology, Neurosurgery & Psychiatry 87, no. 9 (2016): 944-951.
	Bonn-Miller et al. (2021)	Medicinal cannabis study	Cannabis-associated paranoia	Adverse effects of medicinal cannabis (paranoia)	44.9	40	Adverse event	12.5 (4.186; 26.803)	0.01683	Bonn-Miller, Marcel O., Sue Sisley, Paula Riggs, Berra Yazar-Klosinski, Julie B. Wang, Mallory JE Loflin, Benjamin Shechet et al. "The short-term impact of 3 smoked cannabis preparations versus placebo on PTSD symptoms: A randomized cross-over clinical trial." Plos one 16, no. 3 (2021): e0246990.
	Bonn-Miller et al. (2021)	Medicinal cannabis study	Cannabis-associated hallucinations	Adverse effects of medicinal cannabis (hallucinations)	44.9	40	Adverse event	2.5 (0.063; 13.159)	0.3112	Bonn-Miller, Marcel O., Sue Sisley, Paula Riggs, Berra Yazar-Klosinski, Julie B. Wang, Mallory JE Loflin, Benjamin Shechet et al. "The short-term impact of 3 smoked cannabis preparations versus placebo on PTSD symptoms: A randomized cross-over clinical trial." Plos one 16, no. 3 (2021): e0246990.
	Aviram et al. (2021)	Medicinal cannabis study	Cannabis-associated paranoia	Adverse effects of medicinal cannabis (paranoia)	47	829	Adverse event	1.809 (1.016; 2.967)	9.287e-05	Aviram, Joshua, Dorit Pud, Tamar Gershoni, Bareket Schiff‐Keren, Miriam Ogintz, Simon Vulfsons, Tamar Yashar et al. "Medical cannabis treatment for chronic pain: Outcomes and prediction of response." European Journal of Pain 25, no. 2 (2021): 359-374.
	Aviram et al. (2021)	Medicinal cannabis study	Cannabis-associated hallucinations	Adverse effects of medicinal cannabis (hallucinations)	47	829	Adverse event	2.413 (1.48; 3.701)	5.98e-06	Aviram, Joshua, Dorit Pud, Tamar Gershoni, Bareket Schiff‐Keren, Miriam Ogintz, Simon Vulfsons, Tamar Yashar et al. "Medical cannabis treatment for chronic pain: Outcomes and prediction of response." European Journal of Pain 25, no. 2 (2021): 359-374.
	Aviram et al. (2021)	Medicinal cannabis study	Cannabis-associated psychosis-like symptoms	Adverse effects (psychotic episode)	47	829	Full episode	0.965 (0.418; 1.893)	0.004481	Aviram, Joshua, Dorit Pud, Tamar Gershoni, Bareket Schiff‐Keren, Miriam Ogintz, Simon Vulfsons, Tamar Yashar et al. "Medical cannabis treatment for chronic pain: Outcomes and prediction of response." European Journal of Pain 25, no. 2 (2021): 359-374.
	Gustavsen et al. (2021)	Medicinal cannabis study	Cannabis-associated paranoia	Adverse effects of medicinal cannabis (paranoia)	50	28	Adverse event	0 (0; 12.344)	1	Gustavsen, S., H. B. Søndergaard, K. Linnet, R. Thomsen, B. S. Rasmussen, P. S. Sorensen, F. Sellebjerg, and A. B. Oturai. "Safety and efficacy of low-dose medical cannabis oils in multiple sclerosis." Multiple sclerosis and related disorders 48 (2021): 102708.
	Gustavsen et al. (2021)	Medicinal cannabis study	Cannabis-associated hallucinations	Adverse effects of medicinal cannabis (hallucinations)	50	28	Adverse event	0 (0; 12.344)	1	Gustavsen, S., H. B. Søndergaard, K. Linnet, R. Thomsen, B. S. Rasmussen, P. S. Sorensen, F. Sellebjerg, and A. B. Oturai. "Safety and efficacy of low-dose medical cannabis oils in multiple sclerosis." Multiple sclerosis and related disorders 48 (2021): 102708.
	Theunissen et al. (2021)	Experiment	Cannabis-associated paranoia	Adverse effects of THC (paranoia)	22.8	24	Adverse event	4.167 (0.105; 21.12)	0.307	Theunissen, Eef L., Johannes T. Reckweg, Nadia RPW Hutten, Kim PC Kuypers, Stefan W. Toennes, Merja A. Neukamm, Sebastian Halter, and Johannes G. Ramaekers. "Psychotomimetic symptoms after a moderate dose of a synthetic cannabinoid (JWH-018): implications for psychosis." Psychopharmacology (2021): 1-11.
	Aran et al. (2021)	Medicinal cannabis study	Cannabis-associated hallucinations	Adverse effects of medicinal cannabis (hallucinations)	11.8	93	Adverse event	6.452 (2.404; 13.515)	0.01132	Aran, Adi, Moria Harel, Hanoch Cassuto, Lola Polyansky, Aviad Schnapp, Nadia Wattad, Dorit Shmueli, Daphna Golan, and F. Xavier Castellanos. "Cannabinoid treatment for autism: a proof-of-concept randomized trial." Molecular autism 12, no. 1 (2021): 1-11.
	Aran et al. (2021)	Medicinal cannabis study	Cannabis-associated delusions	Adverse effects of medicinal cannabis (delusions)	11.8	93	Adverse event	9.677 (4.521; 17.577)	0.001596	Aran, Adi, Moria Harel, Hanoch Cassuto, Lola Polyansky, Aviad Schnapp, Nadia Wattad, Dorit Shmueli, Daphna Golan, and F. Xavier Castellanos. "Cannabinoid treatment for autism: a proof-of-concept randomized trial." Molecular autism 12, no. 1 (2021): 1-11.
	Schmidt et al. (2021)	Medicinal cannabis study	Cannabis-associated paranoia	Adverse effects of medicinal cannabis (paranoia)	54	10010	Adverse event	0.4 (0.286; 0.544)	2.339e-10	Schmidt-Wolf, Gabriele, and Peter Cremer-Schaeffer. "3 Jahre Cannabis als Medizin–Zwischenergebnisse der Cannabisbegleiterhebung." Bundesgesundheitsblatt-Gesundheitsforschung-Gesundheitsschutz 64, no. 3 (2021): 368-377.
	Schmidt et al. (2021)	Medicinal cannabis study	Cannabis-associated hallucinations	Adverse effects of medicinal cannabis (hallucinations)	54	10010	Adverse event	0.799 (0.634; 0.994)	2.702e-19	Schmidt-Wolf, Gabriele, and Peter Cremer-Schaeffer. "3 Jahre Cannabis als Medizin–Zwischenergebnisse der Cannabisbegleiterhebung." Bundesgesundheitsblatt-Gesundheitsforschung-Gesundheitsschutz 64, no. 3 (2021): 368-377.
	Fairhurst et al. (2020)	Medicinal cannabis study	Cannabis-associated hallucinations	Adverse effects of medicinal cannabis (hallucinations)	12	47	Adverse event	6.383 (1.336; 17.539)	0.07343	Fairhurst, Charlie, Ram Kumar, Daniel Checketts, Bola Tayo, and Susie Turner. "Efficacy and safety of nabiximols cannabinoid medicine for paediatric spasticity in cerebral palsy or traumatic brain injury: a randomized controlled trial." Developmental Medicine & Child Neurology 62, no. 9 (2020): 1031-1039.
	Habib et al. (2020)	Medicinal cannabis study	Cannabis-associated psychosis-like symptoms	Adverse effects of medicinal cannabis (psychotic episode)	45	101	Full episode	0.99 (0.025; 5.393)	0.3149	Habib, G., & Levinger, U. (2020). CHARACTERISTICS OF MEDICAL CANNABIS USAGE AMONG PATIENTS WITH FIBROMYALGIA. Harefuah, 159(5), 343-348.
	Safakish et al. (2020)	Medicinal cannabis study	Cannabis-associated hallucinations	Adverse effects of medicinal cannabis (hallucinations)	49.6	628	Adverse event	0.796 (0.259; 1.848)	0.02477	Safakish, Ramin, Gordon Ko, Vahid Salimpour, Bryan Hendin, Imrat Sohanpal, Gena Loheswaran, and Sun Young Rosalia Yoon. "Medical Cannabis for the Management of Pain and Quality of Life in Chronic Pain Patients: A Prospective Observational Study." Pain Medicine 21, no. 11 (2020): 3073-3086.
	Safakish et al. (2020)	Medicinal cannabis study	Cannabis-associated paranoia	Adverse effects of medicinal cannabis (paranoia)	49.6	628	Adverse event	3.503 (2.208; 5.256)	1.799e-06	Safakish, Ramin, Gordon Ko, Vahid Salimpour, Bryan Hendin, Imrat Sohanpal, Gena Loheswaran, and Sun Young Rosalia Yoon. "Medical Cannabis for the Management of Pain and Quality of Life in Chronic Pain Patients: A Prospective Observational Study." Pain Medicine 21, no. 11 (2020): 3073-3086.
	Grimison et al. (2020)	Medicinal cannabis study	Cannabis-associated hallucinations	Adverse effects of medicinal cannabis (hallucinations)	55	78	Adverse event	0 (0; 4.619)	1	Grimison, P., A. Mersiades, A. Kirby, N. Lintzeris, R. Morton, P. Haber, I. Olver et al. "Oral THC: CBD cannabis extract for refractory chemotherapy-induced nausea and vomiting: a randomised, placebo-controlled, phase II crossover trial." Annals of Oncology 31, no. 11 (2020): 1553-1560.# 19 patients received either nabilone (median dose = 0.75 mg) or pla- cebo
	Martin-Santos et al. (2012)	Experiment	Cannabis-associated psychosis-like symptoms	PANSS (positive)	26.4	16	Psychosis-like	31.25 (11.017; 58.662)	0.007001	Martin-Santos, R., J. a Crippa, A. Batalla, S. Bhattacharyya, Z. Atakan, S. Borgwardt, P. Allen et al. "Acute effects of a single, oral dose of d9-tetrahydrocannabinol (THC) and cannabidiol (CBD) administration in healthy volunteers." Current pharmaceutical design 18, no. 32 (2012): 4966-4979.
	Favrat et al. (2005)	Experiment	Cannabis-associated psychosis-like symptoms	Adverse reaction (psychotic episode)	26.4	8	Full episode	25 (3.185; 65.086)	0.1025	Favrat, Bernard, Annick Ménétrey, Marc Augsburger, Laura E. Rothuizen, Monique Appenzeller, Thierry Buclin, Marie Pin, Patrice Mangin, and Christian Giroud. "Two cases of" cannabis acute psychosis" following the administration of oral cannabis." BMC psychiatry 5, no. 1 (2005): 1-6.
	Cavazos-Rehg et al. (2018)	Observational study	Cannabis-associated paranoia	Single item (paranoia (yes/no) when using cannabis)	25	234	Psychosis-like	6.838 (3.959; 10.867)	3.41e-05	Cavazos-Rehg, Patricia A., Melissa J. Krauss, Shaina J. Sowles, Glennon M. Floyd, Elizabeth S. Cahn, Veronica L. Chaitan, and Marisel Ponton. "Leveraging user perspectives for insight into cannabis concentrates." The American journal of drug and alcohol abuse 44, no. 6 (2018): 628-641.
	Morvan et al. (2009)	Observational study	Cannabis-associated psychosis-like symptoms	Single item (psychosis-like experiences at first use)	20	352	Psychosis-like	26 (21.495; 30.914)	9.92e-29	Morvan, Y., J. Rouvier, J-P. Olié, H. Lôo, and M-O. Krebs. "Consommations de substances illicites chez les étudiants: une enquête en service de médecine préventive." L'Encéphale 35 (2009): S202-S208.
	Morvan et al. (2009)	Observational study	Cannabis-associated hallucinations	Single item (visual / auditory hallucinations at first use)	20	352	Psychosis-like	8 (5.388; 11.344)	3.157e-08	Morvan, Y., J. Rouvier, J-P. Olié, H. Lôo, and M-O. Krebs. "Consommations de substances illicites chez les étudiants: une enquête en service de médecine préventive." L'Encéphale 35 (2009): S202-S208.
	Morvan et al. (2009)	Observational study	Cannabis-associated paranoia	Single item (paranoia (feelings of mistrust and persecution) at first use)	20	352	Psychosis-like	11 (7.93; 14.745)	4.227e-11	Morvan, Y., J. Rouvier, J-P. Olié, H. Lôo, and M-O. Krebs. "Consommations de substances illicites chez les étudiants: une enquête en service de médecine préventive." L'Encéphale 35 (2009): S202-S208.
	Barratt et al. (2013)	Observational study	Cannabis-associated paranoia	Single item (side effects of synthetic cannabis (paranoia))	27	291	Psychosis-like	18 (13.76; 22.905)	1.324e-15	Barratt, Monica J., Vince Cakic, and Simon Lenton. "Patterns of synthetic cannabinoid use in A ustralia." Drug and alcohol review 32, no. 2 (2013): 141-146.
	Barratt et al. (2013)	Observational study	Cannabis-associated psychosis-like symptoms	Single item (side effects of synthetic cannabis (psychosis))	27	291	Psychosis-like	4 (2.059; 6.938)	0.0004975	Barratt, Monica J., Vince Cakic, and Simon Lenton. "Patterns of synthetic cannabinoid use in A ustralia." Drug and alcohol review 32, no. 2 (2013): 141-146.
	Contreras et al. (2020)	Observational study	Cannabis-associated paranoia	Single item (adverse effects experienced after use (paranoia))		1252	Psychosis-like	20.847 (18.627; 23.204)	1.095e-73	Contreras, Alexandra Elyse, Katelyn E. Hall, Daniel I. Vigil, Allison Rosenthal, Alejandro Azofeifa, and Michael Van Dyke. "Results from the Colorado Cannabis Users Survey on Health (CUSH), 2016." International Journal of Mental Health and Addiction 18, no. 1 (2020): 1-13.
	Contreras et al. (2020)	Observational study	Cannabis-associated hallucinations	Single item (adverse effects experienced after use (hallucinations))		1252	Psychosis-like	3.435 (2.496; 4.599)	2.506e-11	Contreras, Alexandra Elyse, Katelyn E. Hall, Daniel I. Vigil, Allison Rosenthal, Alejandro Azofeifa, and Michael Van Dyke. "Results from the Colorado Cannabis Users Survey on Health (CUSH), 2016." International Journal of Mental Health and Addiction 18, no. 1 (2020): 1-13.
	LaFrance et al. (2020)	Observational study	Cannabis-associated paranoia	ARS	20.9	999	Psychosis-like	50.3 (47.152; 53.446)	7.082e-222	LaFrance, Emily M., Amanda Stueber, Nicholas C. Glodosky, Dakota Mauzay, and Carrie Cuttler. "Overbaked: assessing and predicting acute adverse reactions to Cannabis." Journal of Cannabis Research 2, no. 1 (2020): 1-10.
	LaFrance et al. (2020)	Observational study	Cannabis-associated hallucinations	ARS	20.9	999	Psychosis-like	17 (14.721; 19.476)	2.055e-46	LaFrance, Emily M., Amanda Stueber, Nicholas C. Glodosky, Dakota Mauzay, and Carrie Cuttler. "Overbaked: assessing and predicting acute adverse reactions to Cannabis." Journal of Cannabis Research 2, no. 1 (2020): 1-10.
	Naef et al. (2003)	Experiment	Cannabis-associated hallucinations	VAS	26	12	Psychosis-like	50 (21.094; 78.906)	0.000532	Naef, Myrtha, Michele Curatolo, Steen Petersen-Felix, Lars Arendt-Nielsen, Alex Zbinden, and Rudolf Brenneisen. "The analgesic effect of oral delta-9-tetrahydrocannabinol (THC), morphine, and a THC-morphine combination in healthy subjects under experimental pain conditions." Pain 105, no. 1-2 (2003): 79-88.
	Zeiger et al. (2021)	Observational study	Cannabis-associated paranoia	Single item (adverse subjective effects when using cannabis (paranoia))		88	Adverse event	21.6 (13.536; 31.655)	8.483e-07	Zeiger, Joanna S., William S. Silvers, Tonya A. Winders, Mary K. Hart, and Robert S. Zeiger. "Cannabis attitudes and patterns of use among followers of the Allergy & Asthma Network." Annals of Allergy, Asthma & Immunology 126, no. 4 (2021): 401-410.
	Mathews et al. (2019)	Observational study	Cannabis-associated paranoia	Single item (effects experienced when using synthetic cannabinoids (paranoia))	20	90	Adverse event	63.333 (52.515; 73.248)	1.114e-35	Mathews, Eva M., Emily Jeffries, Chenen Hsieh, Glenn Jones, and Julia D. Buckner. "Synthetic cannabinoid use among college students." Addictive behaviors 93 (2019): 219-224.
	Mathews et al. (2019)	Observational study	Cannabis-associated hallucinations	Single item (effects experienced when using synthetic cannabinoids (hallucinations))	20	90	Adverse event	32.222 (22.752; 42.9)	6.104e-11	Mathews, Eva M., Emily Jeffries, Chenen Hsieh, Glenn Jones, and Julia D. Buckner. "Synthetic cannabinoid use among college students." Addictive behaviors 93 (2019): 219-224.
	Gilman et al. (2019)	Experiment	Cannabis-associated paranoia	Adverse effects related to THC administration (paranoia)	26	54	Adverse event	3.704 (0.452; 12.747)	0.1495	Gilman, Jodi M., Meryem A. Yücel, Gladys N. Pachas, Kevin Potter, Nina Levar, Hannah Broos, Eve M. Manghis, Randi M. Schuster, and A. Eden Evins. "Delta-9-tetrahydrocannabinol intoxication is associated with increased prefrontal activation as assessed with functional near-infrared spectroscopy: A report of a potential biomarker of intoxication." Neuroimage 197 (2019): 575-585.
	Li et al. (2019)	Medicinal cannabis study	Cannabis-associated paranoia	Adverse effects of medicinal cannabis (paranoia)		2987	Adverse event	2 (1.529; 2.568)	5.827e-15	Li, Xiaoxue, Jacob M. Vigil, Sarah S. Stith, Franco Brockelman, Keenan Keeling, and Branden Hall. "The effectiveness of self-directed medical cannabis treatment for pain." Complementary therapies in medicine 46 (2019): 123-130.
	Bhattacharyya et al. (2018)	Experiment	Cannabis-associated psychosis-like symptoms	PANSS (>3 on PANSS-positive)	25.97	36	Psychosis-like	38.889 (23.142; 56.536)	1.698e-06	Bhattacharyya, Sagnik, Thomas Sainsbury, Paul Allen, Chiara Nosarti, Zerrin Atakan, Vincent Giampietro, Michael Brammer, and P. K. McGuire. "Increased hippocampal engagement during learning as a marker of sensitivity to psychotomimetic effects of δ-9-THC." Psychological medicine 48, no. 16 (2018): 2748-2756.
	Flachenecker et al. (2014)	Medicinal cannabis study	Cannabis-associated paranoia	Single item (adverse events)		104	Adverse event	0.962 (0.024; 5.241)	0.315	Flachenecker, Peter, Thomas Henze, and Uwe K. Zettl. "Long-term effectiveness and safety of nabiximols (tetrahydrocannabinol/cannabidiol oromucosal spray) in clinical practice." European neurology 72, no. 1-2 (2014): 95-102.
	Cameron et al. (2014)	Medicinal cannabis study	Cannabis-associated paranoia	Adverse effects of medicinal cannabis (paranoia)	32.7	104	Adverse event	1.923 (0.234; 6.774)	0.1533	Cameron, C., Watson, D., & Robinson, J. (2014). Use of a Synthetic Cannabinoid in a Correctional Population for Posttraumatic Stress Disorder–Related Insomnia and Nightmares, Chronic Pain, Harm Reduction, and Other Indications. Journal of Clinical Psychopharmacology, 34(5), 559–564.
	Ahmed et al. (2014)	Medicinal cannabis study	Cannabis-associated hallucinations	Adverse effects of medicinal cannabis (hallucinations)	72	11	Adverse event	9.091 (0.23; 41.278)	0.2943	Ahmed, Amir IA, Geke AH van den Elsen, Angela Colbers, Marjolein A. van der Marck, David M. Burger, Ton B. Feuth, Marcel GM Olde Rikkert, and Cornelis Kramers. "Safety and pharmacokinetics of oral delta-9-tetrahydrocannabinol in healthy older subjects: a randomized controlled trial." European Neuropsychopharmacology 24, no. 9 (2014): 1475-1482.
	Fernandez et al. (2014)	Medicinal cannabis study	Cannabis-associated paranoia	Adverse effects of medicinal cannabis (paranoia)	25.6	50	Adverse event	2 (0.051; 10.647)	0.3124	Fernández, L. Lorente, E. Monte Boquet, F. Perez-Miralles, I. Gil Gomez, M. Escutia Roig, I. Bosca Blasco, JL Poveda Andrés, and B. Casanova-Estruch. "Clinical experiences with cannabinoids in spasticity management in multiple sclerosis." Neurología (English Edition) 29, no. 5 (2014): 257-260.
	Portenoy et al. (2012)	Medicinal cannabis study	Cannabis-associated hallucinations	Adverse effects of medicinal cannabis (hallucinations)		268	Adverse event	2.985 (1.297; 5.797)	0.004084	Portenoy, R.K., Ganae-Motan, E.D., Allende, S., Yanagihara, R., Shaiova, L., Weinstein, S., McQuade, R., Wright, S. and Fallon, M.T., 2012. Nabiximols for opioid-treated cancer patients with poorly-controlled chronic pain: a randomized, placebo-controlled, graded-dose trial. The Journal of Pain, 13(5), pp.438-449.
	Ware et al. (2010)	Medicinal cannabis study	Cannabis-associated paranoia	Adverse effects of medicinal cannabis (paranoia)	45.4	21	Adverse event	4.762 (0.12; 23.816)	0.3055	Ware, Mark A., Tongtong Wang, Stan Shapiro, Ann Robinson, Thierry Ducruet, Thao Huynh, Ann Gamsa, Gary J. Bennett, and Jean-Paul Collet. "Smoked cannabis for chronic neuropathic pain: a randomized controlled trial." Cmaj 182, no. 14 (2010): E694-E701.
	Cooper et al. (2009)	Experiment	Cannabis-associated paranoia	Adverse effects of THC (paranoia)	25.5	24	Adverse event	4.167 (0.105; 21.12)	0.307	Cooper, Ziva D., and Margaret Haney. "Comparison of subjective, pharmacokinetic, and physiological effects of marijuana smoked as joints and blunts." Drug and alcohol dependence 103, no. 3 (2009): 107-113.
	Brady et al. (2004)	Medicinal cannabis study	Cannabis-associated hallucinations	Adverse effects of medicinal cannabis (hallucinations)	48	21	Adverse event	14.286 (3.049; 36.342)	0.06137	Brady, C. M., R. DasGupta, C. Dalton, O. J. Wiseman, K. J. Berkley, and C. J. Fowler. "An open-label pilot study of cannabis-based extracts for bladder dysfunction in advanced multiple sclerosis." Multiple Sclerosis Journal 10, no. 4 (2004): 425-433.
	Menetrey et al. (2005)	Experiment	Cannabis-associated paranoia	Adverse reaction (paranoia)	26.4	8	Adverse event	12.5 (0.316; 52.651)	0.285	Ménétrey, Annick, Marc Augsburger, Bernard Favrat, Marie A. Pin, Laura E. Rothuizen, Monique Appenzeller, Thierry Buclin, Patrice Mangin, and Christian Giroud. "Assessment of driving capability through the use of clinical and psychomotor tests in relation to blood cannabinoids levels following oral administration of 20 mg dronabinol or of a cannabis decoction made with 20 or 60 mg Δ9-THC." Journa…
	Beaulieu et al. (2006)	Medicinal cannabis study	Cannabis-associated psychosis-like symptoms	Adverse reaction (psychotic episode)	52	41	Full episode	0 (0; 8.604)	1	Beaulieu, Pierre. "Effects of nabilone, a synthetic cannabinoid, on postoperative pain." Canadian Journal of Anesthesia 53, no. 8 (2006): 769-775.
	Holdcroft et al. (2006)	Medicinal cannabis study	Cannabis-associated paranoia	Adverse effects of medicinal cannabis (paranoia)	53	24	Adverse event	8.333 (1.026; 26.997)	0.1396	Holdcroft, Anita, Mervyn Maze, Caroline Dore, Susan Tebbs, and Simon Thompson. "A multicenter dose-escalation study of the analgesic and adverse effects of an oral cannabis extract (Cannador) for postoperative pain management." The Journal of the American Society of Anesthesiologists 104, no. 5 (2006): 1040-1046.
	Buggy et al. (2003)	Medicinal cannabis study	Cannabis-associated hallucinations	Adverse effects of medicinal cannabis (hallucinations)	45	20	Adverse event	0 (0; 16.843)	1	Buggy, Donal J., Lynn Toogood, Shelagh Maric, Paul Sharpe, David G. Lambert, and David J. Rowbotham. "Lack of analgesic efficacy of oral δ-9-tetrahydrocannabinol in postoperative pain." Pain 106, no. 1-2 (2003): 169-172.
	Niederle et al. (1986)	Medicinal cannabis study	Cannabis-associated hallucinations	Adverse effects of medicinal cannabis (hallucinations)	25	20	Adverse event	5 (0.127; 24.873)	0.3049	Niederle, N., J. Schütte, and C. G. Schmidt. "Crossover comparison of the antiemetic efficacy of nabilone and alizapride in patients with nonseminomatous testicular cancer receiving cisplatin therapy." Klinische Wochenschrift 64, no. 8 (1986): 362-365.
	Pomeroy et al. (1986)	Medicinal cannabis study	Cannabis-associated hallucinations	Adverse effects of medicinal cannabis (hallucinations)	42	19	Adverse event	0 (0; 17.647)	1	Pomeroy, Mauve, James J. Fennelly, and Mark Towers. "Prospective randomized double-blind trial of nabilone versus domperidone in the treatment of cytotoxic-induced emesis." Cancer chemotherapy and pharmacology 17, no. 3 (1986): 285-288.
	Niiranen et al. (1985)	Medicinal cannabis study	Cannabis-associated hallucinations	Adverse effects of medicinal cannabis (hallucinations)	61	27	Adverse event	11.111 (2.353; 29.159)	0.06619	Niiranen, Aila, and Karin Mattson. "A cross-over comparison of nabilone and prochlorperazine for emesis induced by cancer chemotherapy." American journal of clinical oncology 8, no. 4 (1985): 336-340.
	Ahmedzai et al. (1983)	Medicinal cannabis study	Cannabis-associated hallucinations	Adverse effects of medicinal cannabis (hallucinations)	58	28	Adverse event	0 (0; 12.344)	1	Ahmedzai, S., D. L. Carlyle, I. T. Calder, and F. Moran. "Anti-emetic efficacy and toxicity of nabilone, a synthetic cannabinoid, in lung cancer chemotherapy." British Journal of Cancer 48, no. 5 (1983): 657-663.
	Sweet et al. (1981)	Medicinal cannabis study	Cannabis-associated hallucinations	Adverse effects of medicinal cannabis (hallucinations)	51.5	25	Adverse event	4 (0.101; 20.352)	0.3074	Sweet, Donald L., Nancy J. Miller, William Wellington, Edward Senay, and Lisa Sushelsky. "Δ9‐tetrahydrocannabinol as an antiemetic for patients receiving cancer chemotherapy. A pilot study." The Journal of Clinical Pharmacology 21, no. S1 (1981): 70S-75S.
	Noyes et al. (1976)	Medicinal cannabis study	Cannabis-associated hallucinations	SDES	51	44	Psychosis-like	13.636 (5.173; 27.351)	0.008394	Noyes, Russell, S. Fred Brunk, David H. Avery, and Arthur Canter. "Psychologic effects of oral delta-9-tetrahydrocannabinol in advanced cancer patients." Comprehensive psychiatry (1976).
	Marcus et al. (1974)	Observational study	Cannabis-associated hallucinations	Single item (adverse effects from cannabis (hallucinations))	22.5	43	Adverse event	2.326 (0.059; 12.289)	0.3116	Marcus, Anthony M., Harry Klonoff, and Morton Low. "Psychiatric status of the marihuana user." Canadian Psychiatric Association Journal 19, no. 1 (1974): 31-39.
	Marcus et al. (1974)	Observational study	Cannabis-associated paranoia	Single item (adverse effects from cannabis (paranoia))	22.5	81	Adverse event	4.938 (1.362; 12.164)	0.04024	Marcus, Anthony M., Harry Klonoff, and Morton Low. "Psychiatric status of the marihuana user." Canadian Psychiatric Association Journal 19, no. 1 (1974): 31-39.
	Schoeler et al. (2022)	Observational study	Cannabis-associated psychosis-like symptoms	Single item (have you ever sought emergency medical treatment [for hallucinations or paranoia] following your use of cannabis?)		72892	Full episode	0.488 (0.439; 0.542)	8.712e-80	Schoeler, Tabea, Jason Ferris, and Adam R. Winstock. "Rates and correlates of cannabis-associated psychotic symptoms in over 230,000 people who use cannabis." Translational psychiatry 12, no. 1 (2022): 1-8.
	Rup et al. (2022)	Observational study	Cannabis-associated hallucinations	Single item (in the past 12 months, did you seek medical help for any adverse or negative health effects? (hallucinations))	21.4	6344	Full episode	0.583 (0.411; 0.803)	1.057e-09	Rup, Jennifer, Tom P. Freeman, Chris Perlman, and David Hammond. "Cannabis and Mental Health: Adverse Outcomes and Self-Reported Impact of Cannabis Use by Mental Health Status." Substance Use & Misuse 57, no. 5 (2022): 719-729.
	Ueberall et al. (2022)	Medicinal cannabis study	Cannabis-associated hallucinations	Adverse effects of medicinal cannabis (hallucinations)	57	1145	Adverse event	1.572 (0.934; 2.473)	1.9e-05	Ueberall, Michael A., Johannes Horlemann, Norbert Schuermann, Maja Kalaba, and Mark A. Ware. "Effectiveness and Tolerability of Dronabinol Use in Patients with Chronic Pain: A Retrospective Analysis of 12-Week Open-Label Real-World Data Provided by the German Pain e-Registry." Pain Medicine (2022).
	Ueberall et al. (2022)	Medicinal cannabis study	Cannabis-associated paranoia	Adverse effects of medicinal cannabis (paranoia)	57	1145	Adverse event	0.786 (0.36; 1.487)	0.002597	Ueberall, Michael A., Johannes Horlemann, Norbert Schuermann, Maja Kalaba, and Mark A. Ware. "Effectiveness and Tolerability of Dronabinol Use in Patients with Chronic Pain: A Retrospective Analysis of 12-Week Open-Label Real-World Data Provided by the German Pain e-Registry." Pain Medicine (2022).
	Ueberall et al. (2022)	Medicinal cannabis study	Cannabis-associated delusions	Adverse effects of medicinal cannabis (delusions)	57	1145	Adverse event	0.961 (0.481; 1.712)	0.0008602	Ueberall, Michael A., Johannes Horlemann, Norbert Schuermann, Maja Kalaba, and Mark A. Ware. "Effectiveness and Tolerability of Dronabinol Use in Patients with Chronic Pain: A Retrospective Analysis of 12-Week Open-Label Real-World Data Provided by the German Pain e-Registry." Pain Medicine (2022).
	Melen et al. (2022)	Medicinal cannabis study	Cannabis-associated hallucinations	Adverse effects of medicinal cannabis (hallucinations)	73	23	Adverse event	30.435 (13.21; 52.919)	0.001513	Melén, Christopher M., Magali Merrien, Agata M. Wasik, Georgios Panagiotidis, Olof Beck, Kristina Sonnevi, Henna-Riikka Junlén, Birger Christensson, Birgitta Sander, and Björn Engelbrekt Wahlin. "Clinical effects of a single dose of cannabinoids to patients with chronic lymphocytic leukemia." Leukemia & Lymphoma 63, no. 6 (2022): 1387-1397.
	Abi-Jaoude et al. (2022)	Medicinal cannabis study	Cannabis-associated hallucinations	Adverse effects of medicinal cannabis (hallucinations)		9	Adverse event	0 (0; 33.627)	1	Abi-Jaoude, Elia, Tracy Bhikram, Ferdous Parveen, Jody Levenbach, Myriam Lafreniere-Roula, and Paul Sandor. "A Double-Blind, Randomized, Controlled Crossover Trial of Cannabis in Adults with Tourette Syndrome." Cannabis and Cannabinoid Research (2022).
	Peters et al. (2022)	Medicinal cannabis study	Cannabis-associated paranoia	Adverse effects of medicinal cannabis (paranoia)	28.1	33	Adverse event	6.061 (0.743; 20.226)	0.1445	Peters, Erica N., Irina Mosesova, Laura MacNair, Ryan Vandrey, M. Hunter Land, Mark A. Ware, Cynthia Turcotte, and Marcel O. Bonn-Miller. "Safety, Pharmacokinetics and Pharmacodynamics of Spectrum Red Softgels in Healthy Participants." Journal of Analytical Toxicology 46, no. 5 (2022): 528-539.
	Santarossa et al. (2022)	Medicinal cannabis study	Cannabis-associated hallucinations	Adverse effects of medicinal cannabis (hallucinations)	44	215	Adverse event	0.93 (0.113; 3.32)	0.1554	Santarossa, Talia M., Randy So, Penelope Smyth, Stefan Gustavsen, and Ross T. Tsuyuki. "Medical cannabis use in Canadians with multiple sclerosis." Multiple Sclerosis and Related Disorders 59 (2022): 103638.
	Santarossa et al. (2022)	Medicinal cannabis study	Cannabis-associated paranoia	Adverse effects of medicinal cannabis (paranoia)	44	215	Adverse event	5.116 (2.581; 8.97)	0.000662	Santarossa, Talia M., Randy So, Penelope Smyth, Stefan Gustavsen, and Ross T. Tsuyuki. "Medical cannabis use in Canadians with multiple sclerosis." Multiple Sclerosis and Related Disorders 59 (2022): 103638.
	Tumati et al. (2022)	Medicinal cannabis study	Cannabis-associated hallucinations	Adverse effects of medicinal cannabis (hallucinations)	73.2	3009	Adverse event	0.499 (0.279; 0.821)	0.0001033	Tumati, Shankar, Krista L. Lanctôt, RuoDing Wang, Abby Li, Andrew Davis, and Nathan Herrmann. "Medical cannabis use among older adults in Canada: self-reported data on types and amount used, and perceived effects." Drugs & aging 39, no. 2 (2022): 153-163.
	Tofthagen et al. (2022)	Medicinal cannabis study	Cannabis-associated paranoia	Adverse effects of medicinal cannabis (paranoia)	57.33	155	Adverse event	3.226 (1.056; 7.367)	0.02302	Tofthagen, Cindy, Adam Perlman, Pooja Advani, Brenda Ernst, Judith Kaur, Winston Tan, Katharine Sheffield, John Crump, Joshua Henry, and Jason Starr. "Medical Marijuana Use for Cancer-Related Symptoms among Floridians: A Descriptive Study." Journal of Palliative Medicine 25, no. 10 (2022): 1563-1570.
	Walsh et al. (2021)	Medicinal cannabis study	Cannabis-associated hallucinations	Adverse effects of medicinal cannabis (hallucinations)	53	24	Adverse event	4.167 (0.105; 21.12)	0.307	Walsh, Jennifer H., Kathleen J. Maddison, Tim Rankin, Kevin Murray, Nigel McArdle, Melissa J. Ree, David R. Hillman, and Peter R. Eastwood. "Treating insomnia symptoms with medicinal cannabis: a randomized, crossover trial of the efficacy of a cannabinoid medicine compared with placebo." Sleep 44, no. 11 (2021): zsab149.
	Halikas et al. (1971)	Observational study	Cannabis-associated hallucinations	Acute intoxication effects - checklist (hallucinations)	22	100	Psychosis-like	27 (18.607; 36.802)	1.19e-09	Halikas, James A., Donald W. Goodwin, and Samuel B. Guze. "Marihuana effects: a survey of regular users." Jama 217, no. 5 (1971): 692-694.
	Greywoode et al. (2022)	Medicinal cannabis study	Cannabis-associated paranoia	Adverse effects of medicinal cannabis (paranoia)	40	236	Adverse event	3.39 (1.475; 6.57)	0.004007	Greywoode, Ruby, Chinazo Cunningham, Maegan Hollins, and Olga Aroniadis. "Medical Cannabis Use Patterns and Adverse Effects in Inflammatory Bowel Disease." Journal of Clinical Gastroenterology (2022): 10-1097.
	Stith et al. (2023)	Medicinal cannabis study	Cannabis-associated paranoia	Adverse effects of medicinal cannabis (paranoia)		1882	Adverse event	2.976 (2.255; 3.847)	3.026e-14	Stith, Sarah See, Xiaoxue Li, Franco Brockelman, Keenan Keeling, Branden Hall, and Jacob Miguel Vigil. "Understanding Feeling" High" and Its Role in Medical Cannabis Patient Outcomes." Frontiers in Pharmacology 14: 1380.
	Aladeen et al. (2023)	Medicinal cannabis study	Cannabis-associated hallucinations	Adverse effects of medicinal cannabis (hallucinations)	72	69	Adverse event	2.899 (0.353; 10.082)	0.1512	Aladeen, Traci S., Anna G. Mattle, Kory Zelen, Moustafa Mesha, Michelle M. Rainka, Tanya Geist, Bennett Myers, and Laszlo Mechtler. "Medical Cannabis in the Treatment of Parkinson’s Disease." Clinical neuropharmacology (2023): 10-1097.
	Arkell et al. (2023)	Medicinal cannabis study	Cannabis-associated hallucinations	Adverse effects of medicinal cannabis (hallucinations)	55.9	3148	Adverse event	1.429 (1.045; 1.908)	1.412e-11	Arkell, Thomas R., Luke A. Downey, Amie C. Hayley, and Sebastian Roth. "Assessment of medical cannabis and health-related quality of life." JAMA network open 6, no. 5 (2023): e2312522-e2312522.
	Bassat et al. (2023)	Medicinal cannabis study	Cannabis-associated hallucinations	Adverse effects of medicinal cannabis (hallucinations)	64.1	9	Adverse event	11.111 (0.281; 48.25)	0.2888	Kliuk-Ben Bassat, Orit, Meir Schechter, Natalia Ashtamker, Ilan Yanuv, Aliza Rozenberg, Boaz Hirshberg, Ayelet Grupper, Nachum Vaisman, Silviu Brill, and Ofri Mosenzon. "Medical cannabis for pain management in patients undergoing chronic hemodialysis: randomized, double-blind, cross-over, feasibility study." Clinical Kidney Journal 16, no. 4 (2023): 701-710.
	Olsson et al. (2023)	Medicinal cannabis study	Cannabis-associated paranoia	Adverse effects of medicinal cannabis (paranoia)	42.22	2833	Adverse event	0.318 (0.145; 0.602)	0.002658	Olsson, F., Erridge, S., Tait, J., Holvey, C., Coomber, R., Beri, S., Hoare, J., Khan, S., Weatherall, M.W., Platt, M. and Rucker, J.J., 2023. An observational study of safety and clinical outcome measures across patient groups in the United Kingdom Medical Cannabis Registry. Expert Review of Clinical Pharmacology, 16(3), pp.257-266.
	Olsson et al. (2023)	Medicinal cannabis study	Cannabis-associated psychosis-like symptoms	Adverse effects of medicinal cannabis (psychosis)	42.22	2833	Adverse event	0.071 (0.009; 0.255)	0.1572	Olsson, F., Erridge, S., Tait, J., Holvey, C., Coomber, R., Beri, S., Hoare, J., Khan, S., Weatherall, M.W., Platt, M. and Rucker, J.J., 2023. An observational study of safety and clinical outcome measures across patient groups in the United Kingdom Medical Cannabis Registry. Expert Review of Clinical Pharmacology, 16(3), pp.257-266.
	Olsson et al. (2023)	Medicinal cannabis study	Cannabis-associated delusions	Adverse effects of medicinal cannabis (delusions)	42.22	2833	Adverse event	0.035 (0.001; 0.197)	0.3172	Olsson, F., Erridge, S., Tait, J., Holvey, C., Coomber, R., Beri, S., Hoare, J., Khan, S., Weatherall, M.W., Platt, M. and Rucker, J.J., 2023. An observational study of safety and clinical outcome measures across patient groups in the United Kingdom Medical Cannabis Registry. Expert Review of Clinical Pharmacology, 16(3), pp.257-266.
	Olsson et al. (2023)	Medicinal cannabis study	Cannabis-associated hallucinations	Adverse effects of medicinal cannabis (hallucinations)	42.22	2833	Adverse event	0.035 (0.001; 0.197)	0.3172	Olsson, F., Erridge, S., Tait, J., Holvey, C., Coomber, R., Beri, S., Hoare, J., Khan, S., Weatherall, M.W., Platt, M. and Rucker, J.J., 2023. An observational study of safety and clinical outcome measures across patient groups in the United Kingdom Medical Cannabis Registry. Expert Review of Clinical Pharmacology, 16(3), pp.257-266.
	Lawn et al. (2023)	Experiment	Cannabis-associated psychosis-like symptoms	PANSS (positive, clinically significant psychotic reaction on PANSS Positive (i.e. score >3 greater than minimum)	22.47	48	Psychosis-like	56.25 (41.181; 70.52)	3.971e-15	Lawn, W., Trinci, K., Mokrysz, C., Borissova, A., Ofori, S., Petrilli, K., Bloomfield, M., Haniff, Z.R., Hall, D., Fernandez‐Vinson, N. and Wang, S., 2023. The acute effects of cannabis with and without cannabidiol in adults and adolescents: A randomised, double‐blind, placebo‐controlled, crossover experiment. Addiction.
	Johnson et al. (2023)	Observational study	Cannabis-associated psychosis-like symptoms	SSAGA	32.4	4832	Psychosis-like	45.737 (44.325; 47.154)	0	Johnson, Emma C., Sarah MC Colbert, Paul W. Jeffries, Rebecca Tillman, Tim B. Bigdeli, Nicole R. Karcher, Grace Chan et al. "Associations between cannabis use, polygenic liability for schizophrenia, and cannabis-related experiences in a sample of cannabis users." Schizophrenia bulletin 49, no. 3 (2023): 778-787.
	Johnson et al. (2023)	Observational study	Cannabis-associated hallucinations	SSAGA	32.4	4832	Psychosis-like	11.672 (10.78; 12.611)	6.975e-141	Johnson, Emma C., Sarah MC Colbert, Paul W. Jeffries, Rebecca Tillman, Tim B. Bigdeli, Nicole R. Karcher, Grace Chan et al. "Associations between cannabis use, polygenic liability for schizophrenia, and cannabis-related experiences in a sample of cannabis users." Schizophrenia bulletin 49, no. 3 (2023): 778-787.
	Johnson et al. (2023)	Observational study	Cannabis-associated paranoia	SSAGA	32.4	4832	Psychosis-like	17.508 (16.446; 18.61)	5.001e-225	Johnson, Emma C., Sarah MC Colbert, Paul W. Jeffries, Rebecca Tillman, Tim B. Bigdeli, Nicole R. Karcher, Grace Chan et al. "Associations between cannabis use, polygenic liability for schizophrenia, and cannabis-related experiences in a sample of cannabis users." Schizophrenia bulletin 49, no. 3 (2023): 778-787.
	Schubert et al. (2023)	Medicinal cannabis study	Cannabis-associated hallucinations	Adverse effects of medicinal cannabis (hallucinations)	54	123	Adverse event	1.626 (0.198; 5.75)	0.1539	Schubert, Elise A., Johannes C. Alffenaar, Masego T. Johnstone, John W. Barlow, and Nial J. Wheate. "Medicinal cannabis for patients with chronic non-cancer pain: analysis of safety and concomitant medications." International Journal of Pharmacy Practice 31, no. 1 (2023): 70-79.
	Schubert et al. (2023)	Medicinal cannabis study	Cannabis-associated paranoia	Adverse effects of medicinal cannabis (paranoia)	54	123	Adverse event	0.813 (0.021; 4.446)	0.3153	Schubert, Elise A., Johannes C. Alffenaar, Masego T. Johnstone, John W. Barlow, and Nial J. Wheate. "Medicinal cannabis for patients with chronic non-cancer pain: analysis of safety and concomitant medications." International Journal of Pharmacy Practice 31, no. 1 (2023): 70-79.
	Horsted et al. (2023)	Medicinal cannabis study	Cannabis-associated hallucinations	Adverse effects of medicinal cannabis (hallucinations)	60	331	Adverse event	0.302 (0.008; 1.672)	0.3166	Horsted, Tina, Karoline Lichon Hesthaven, and Peter Derek Christian Leutscher. "Safety and effectiveness of cannabinoids to Danish patients with treatment refractory chronic pain—a retrospective observational real‐world study." European Journal of Pain 27, no. 2 (2023): 234-247.
	Bouassa et al. (2022)	Medicinal cannabis study	Cannabis-associated paranoia	Adverse effects of medicinal cannabis (paranoia)	57	5	Adverse event	20 (0.505; 71.642)	0.2636	Mboumba Bouassa, R.S., Needham, J., Nohynek, D., Singer, J., Lee, T., Bobeuf, F., Samarani, S., Del Balso, L., Paisible, N., Vertzagias, C. and Sebastiani, G., 2022. Safety and Tolerability of Oral Cannabinoids in People Living with HIV on Long-Term ART: A Randomized, Open-Label, Interventional Pilot Clinical Trial (CTNPT 028). Biomedicines, 10(12), p.3168.
	Clarke et al. (2022)	Medicinal cannabis study	Cannabis-associated hallucinations	Adverse effects of medicinal cannabis (hallucinations)	62	25	Adverse event	12 (2.547; 31.219)	0.06484	Clarke, Stephen, Belinda E. Butcher, Andrew J. McLachlan, Jeremy D. Henson, David Rutolo, Sean Hall, and Luis Vitetta. "Pilot clinical and pharmacokinetic study of Δ9-Tetrahydrocannabinol (THC)/Cannabidiol (CBD) nanoparticle oro-buccal spray in patients with advanced cancer experiencing uncontrolled pain." Plos one 17, no. 10 (2022): e0270543.
	Kimless et al. (2022)	Medicinal cannabis study	Cannabis-associated paranoia	Adverse event (paranoid thoughts)	36.7	202	Adverse event	1.98 (0.542; 4.992)	0.04337	Kimless, Debra, Matthew Caloura, Virginia Markos, Jennie Ryan, Sally Abbonizio, and Sharon Janicki. "An Observational Cross-Sectional Survey Exploring the Indications for and Responses to Medical Marijuana Use in Certified Patients in Pennsylvania." Journal of Primary Care & Community Health 13 (2022): 21501319221129734.
	Melges et al. (1974)	Experiment	Cannabis-associated paranoia	Single item (self-reported paranoia)	24	6	Adverse event	66.667 (22.278; 95.673)	0.000532	Melges, Frederick T., Jared R. Tinklenberg, C. Melvin Deardorff, Norma H. Davies, Richard E. Anderson, and Catherine A. Owen. "Temporal disorganization and delusional-like ideation: Processes induced by hashish and alcohol." Archives of general psychiatry 30, no. 6 (1974): 855-861.

## Sheet: Table 3
	Table 3. Summary of pooled rates of cannabis-associated psychotic symptoms
	Study design	Symptom profile of CAPS	% rate CAPS (95% Confidennce Interval)	I2	p-value (Q-test for heterogeneity)	Pooled sample size (k number of non-overlapping samples)
	Observational studies	Delusions	44.5 (35.391; 53.89)	0%		119 (k=1)
	Observational studies	Hallucinations	11.231 (6.37; 16.093)	99.19%	3.4e-85	12209 (k=14)
	Observational studies	Paranoia	25.362 (16.925; 33.798)	99.37%	4.8e-226	12808 (k=17)
	Observational studies	Psychosis-like	20.338 (5.947; 34.729)	99.35%	1.8e-266	6219 (k=5)
	Observational studies	Combined symptoms	19.393 (14.218; 24.568)	99.58%	0	13652 (k=20)
	Experiments	Delusions	4 (1.897; 7.327)	0%		239 (k=1)
	Experiments	Hallucinations	17.264 (11.826; 22.702)	45.8%	0.037	496 (k=5)
	Experiments	Paranoia	7.707 (2.066; 13.349)	80.6%	3.7e-06	560 (k=7)
	Experiments	Psychosis-like	34.696 (17.233; 52.158)	83.14%	2.5e-06	142 (k=5)
	Experiments	Combined symptoms	20.993 (11.291; 30.695)	97.15%	1.1e-29	754 (k=15)
	Medicinal cannabis studies	Delusions	0.667 (-0.146; 1.481)	78.56%	0.00011	4210 (k=4)
	Medicinal cannabis studies	Hallucinations	1.118 (0.769; 1.467)	84.11%	5.3e-29	26876 (k=46)
	Medicinal cannabis studies	Paranoia	1.674 (1.113; 2.234)	90.05%	1.2e-18	22175 (k=24)
	Medicinal cannabis studies	Psychosis-like	0.071 (0.009; 0.255)	0%		2833 (k=1)
	Medicinal cannabis studies	Combined symptoms	1.526 (1.147; 1.905)	95.88%	3.5e-61	32679 (k=58)

## Sheet: Table 4
	Table 4. Overview of studies assessing predictors of cannabis-associated psychotic symptoms
	Note. All questionnaires included in the column 'Measure' are listed with their corresponding reference in the Supplement.
	Author	Reference	Study design	Country	Age (mean)	Definition of CAPS	Measure	Assessed predictor	Cohen's d (95% Confidence Interval)	p-value (Cohen's d)	Number of included individuals
	Thomas et al. (1996)	Thomas, Huw. "A community survey of adverse effects of cannabis use." Drug and alcohol dependence 42, no. 3 (1996): 201-207.	Observational study	NewZealand	27	Cannabis-associated psychosis-like symptoms	Single item (after taking cannabis, have you had strange, unpleasant experiences such as hearing voices or becoming convinced that someone is trying to harm you, or that you are being persecuted?)	Gender	-0.175 (-0.612; 0.263)	0.4336	194
	Thomas et al. (1996)	Thomas, Huw. "A community survey of adverse effects of cannabis use." Drug and alcohol dependence 42, no. 3 (1996): 201-207.	Observational study	NewZealand	27	Cannabis-associated psychosis-like symptoms	Single item (after taking cannabis, have you had strange, unpleasant experiences such as hearing voices or becoming convinced that someone is trying to harm you, or that you are being persecuted?)	Severity of cannabis use	0.15 (-0.287; 0.587)	0.5009	195
	Thomas et al. (1996)	Thomas, Huw. "A community survey of adverse effects of cannabis use." Drug and alcohol dependence 42, no. 3 (1996): 201-207.	Observational study	NewZealand	27	Cannabis-associated psychosis-like symptoms	Single item (after taking cannabis, have you had strange, unpleasant experiences such as hearing voices or becoming convinced that someone is trying to harm you, or that you are being persecuted?)	Severity of cannabis use	-0.533 (-1.144; 0.077)	0.08699	191
	Thomas et al. (1996)	Thomas, Huw. "A community survey of adverse effects of cannabis use." Drug and alcohol dependence 42, no. 3 (1996): 201-207.	Observational study	NewZealand	27	Cannabis-associated psychosis-like symptoms	Single item (after taking cannabis, have you had strange, unpleasant experiences such as hearing voices or becoming convinced that someone is trying to harm you, or that you are being persecuted?)	Severity of cannabis use	0.415 (-0.031; 0.862)	0.06845	188
	Sexton et al. (2019)	Sexton, Michelle, Carrie Cuttler, and Laurie K. Mischley. "A survey of cannabis acute effects and withdrawal symptoms: Differential responses across user types and age." The Journal of Alternative and Complementary Medicine 25, no. 3 (2019): 326-335.	Observational study	US	34.96	Cannabis-associated paranoia	Single item (acute effects of cannabis (paranoia))	Reason (medicinal vs. recreational)	0.56 (0.406; 0.714)	1.128e-12	2001
	Sexton et al. (2019)	Sexton, Michelle, Carrie Cuttler, and Laurie K. Mischley. "A survey of cannabis acute effects and withdrawal symptoms: Differential responses across user types and age." The Journal of Alternative and Complementary Medicine 25, no. 3 (2019): 326-335.	Observational study	US	34.96	Cannabis-associated hallucinations	Single item (acute effects of cannabis (hallucinations))	Reason (medicinal vs. recreational)	0.22 (-0.034; 0.474)	0.09016	2001
	Sexton et al. (2019)	Sexton, Michelle, Carrie Cuttler, and Laurie K. Mischley. "A survey of cannabis acute effects and withdrawal symptoms: Differential responses across user types and age." The Journal of Alternative and Complementary Medicine 25, no. 3 (2019): 326-335.	Observational study	US	34.96	Cannabis-associated paranoia	Single item (acute effects of cannabis (paranoia))	Age	-0.213 (-0.287; -0.139)	1.714e-08	2855
	Sexton et al. (2019)	Sexton, Michelle, Carrie Cuttler, and Laurie K. Mischley. "A survey of cannabis acute effects and withdrawal symptoms: Differential responses across user types and age." The Journal of Alternative and Complementary Medicine 25, no. 3 (2019): 326-335.	Observational study	US	34.96	Cannabis-associated hallucinations	Single item (acute effects of cannabis (hallucinations))	Age	-0.067 (-0.14; 0.007)	0.0743	2855
	Arendt et al. (2007)	Arendt, Mikkel, Raben Rosenberg, Lone Fjordback, Jack Brandholdt, Leslie Foldager, Leo Sher, and Povl Munk-Jørgensen. "Testing the self-medication hypothesis of depression and aggression in cannabis-dependent subjects." Psychological medicine 37, no. 7 (2007): 935-945.	Observational study	Denmark	22.3	Cannabis-associated paranoia	Paranoia (total score)	Depression liability	0.624 (0.233; 1.015)	0.00224	119
	Arendt et al. (2007)	Arendt, Mikkel, Raben Rosenberg, Lone Fjordback, Jack Brandholdt, Leslie Foldager, Leo Sher, and Povl Munk-Jørgensen. "Testing the self-medication hypothesis of depression and aggression in cannabis-dependent subjects." Psychological medicine 37, no. 7 (2007): 935-945.	Observational study	Denmark	22.3	Cannabis-associated delusions	Delusions (total score)	Depression liability	0 (-0.339; 0.339)	1	119
	Arendt et al. (2007)	Arendt, Mikkel, Raben Rosenberg, Lone Fjordback, Jack Brandholdt, Leslie Foldager, Leo Sher, and Povl Munk-Jørgensen. "Testing the self-medication hypothesis of depression and aggression in cannabis-dependent subjects." Psychological medicine 37, no. 7 (2007): 935-945.	Observational study	Denmark	22.3	Cannabis-associated hallucinations	Hallucinations (total score)	Depression liability	0 (-0.339; 0.339)	1	119
	Arendt et al. (2007)	Arendt, Mikkel, Raben Rosenberg, Lone Fjordback, Jack Brandholdt, Leslie Foldager, Leo Sher, and Povl Munk-Jørgensen. "Testing the self-medication hypothesis of depression and aggression in cannabis-dependent subjects." Psychological medicine 37, no. 7 (2007): 935-945.	Observational study	Denmark	22.3	Cannabis-associated paranoia	Paranoia (total score)	Aggression (violent behaviour)	0 (-0.392; 0.392)	1	112
	Arendt et al. (2007)	Arendt, Mikkel, Raben Rosenberg, Lone Fjordback, Jack Brandholdt, Leslie Foldager, Leo Sher, and Povl Munk-Jørgensen. "Testing the self-medication hypothesis of depression and aggression in cannabis-dependent subjects." Psychological medicine 37, no. 7 (2007): 935-945.	Observational study	Denmark	22.3	Cannabis-associated delusions	Delusions (total score)	Aggression (violent behaviour)	0 (-0.392; 0.392)	1	112
	Arendt et al. (2007)	Arendt, Mikkel, Raben Rosenberg, Lone Fjordback, Jack Brandholdt, Leslie Foldager, Leo Sher, and Povl Munk-Jørgensen. "Testing the self-medication hypothesis of depression and aggression in cannabis-dependent subjects." Psychological medicine 37, no. 7 (2007): 935-945.	Observational study	Denmark	22.3	Cannabis-associated hallucinations	Hallucinations (total score)	Aggression (violent behaviour)	0 (-0.392; 0.392)	1	112
	Levy et al. (2018)	Levy, Sharon, and Elissa R. Weitzman. "Acute Mental Health Symptoms in Adolescent Marijuana Users." JAMA pediatrics 173, no. 2 (2019): 185-186.	Observational study	US	16.6	Cannabis-associated hallucinations	Single item (in the past 12 months, how often have you seen, felt, or heard things that were not really there [ie, hallucinations] during or after using marijuana?)	Age	0 (-0.339; 0.339)	1	146
	Levy et al. (2018)	Levy, Sharon, and Elissa R. Weitzman. "Acute Mental Health Symptoms in Adolescent Marijuana Users." JAMA pediatrics 173, no. 2 (2019): 185-186.	Observational study	US	16.6	Cannabis-associated hallucinations	Single item (in the past 12 months, how often have you seen, felt, or heard things that were not really there [ie, hallucinations] during or after using marijuana?)	Gender	0 (-0.339; 0.339)	1	146
	Levy et al. (2018)	Levy, Sharon, and Elissa R. Weitzman. "Acute Mental Health Symptoms in Adolescent Marijuana Users." JAMA pediatrics 173, no. 2 (2019): 185-186.	Observational study	US	16.6	Cannabis-associated hallucinations	Single item (in the past 12 months, how often have you seen, felt, or heard things that were not really there [ie, hallucinations] during or after using marijuana?)	Ethnic group	0 (-0.339; 0.339)	1	146
	Levy et al. (2018)	Levy, Sharon, and Elissa R. Weitzman. "Acute Mental Health Symptoms in Adolescent Marijuana Users." JAMA pediatrics 173, no. 2 (2019): 185-186.	Observational study	US	16.6	Cannabis-associated hallucinations	Single item (in the past 12 months, how often have you seen, felt, or heard things that were not really there [ie, hallucinations] during or after using marijuana?)	General health status	0 (-0.339; 0.339)	1	146
	Levy et al. (2018)	Levy, Sharon, and Elissa R. Weitzman. "Acute Mental Health Symptoms in Adolescent Marijuana Users." JAMA pediatrics 173, no. 2 (2019): 185-186.	Observational study	US	16.6	Cannabis-associated hallucinations	Single item (in the past 12 months, how often have you seen, felt, or heard things that were not really there [ie, hallucinations] during or after using marijuana?)	Socioeconomic status	0 (-0.339; 0.339)	1	146
	Levy et al. (2018)	Levy, Sharon, and Elissa R. Weitzman. "Acute Mental Health Symptoms in Adolescent Marijuana Users." JAMA pediatrics 173, no. 2 (2019): 185-186.	Observational study	US	16.6	Cannabis-associated hallucinations	Single item (in the past 12 months, how often have you seen, felt, or heard things that were not really there [ie, hallucinations] during or after using marijuana?)	Severity of cannabis use	0.716 (0.284; 1.147)	0.001159	146
	Levy et al. (2018)	Levy, Sharon, and Elissa R. Weitzman. "Acute Mental Health Symptoms in Adolescent Marijuana Users." JAMA pediatrics 173, no. 2 (2019): 185-186.	Observational study	US	16.6	Cannabis-associated hallucinations	Single item (in the past 12 months, how often have you seen, felt, or heard things that were not really there [ie, hallucinations] during or after using marijuana?)	Severity of cannabis use	0.699 (0.269; 1.13)	0.00144	146
	Levy et al. (2018)	Levy, Sharon, and Elissa R. Weitzman. "Acute Mental Health Symptoms in Adolescent Marijuana Users." JAMA pediatrics 173, no. 2 (2019): 185-186.	Observational study	US	16.6	Cannabis-associated hallucinations	Single item (in the past 12 months, how often have you seen, felt, or heard things that were not really there [ie, hallucinations] during or after using marijuana?)	Anxiety liability	0.347 (-0.145; 0.838)	0.167	146
	Levy et al. (2018)	Levy, Sharon, and Elissa R. Weitzman. "Acute Mental Health Symptoms in Adolescent Marijuana Users." JAMA pediatrics 173, no. 2 (2019): 185-186.	Observational study	US	16.6	Cannabis-associated hallucinations	Single item (in the past 12 months, how often have you seen, felt, or heard things that were not really there [ie, hallucinations] during or after using marijuana?)	Depression liability	0.24 (-0.211; 0.692)	0.2967	146
	Levy et al. (2018)	Levy, Sharon, and Elissa R. Weitzman. "Acute Mental Health Symptoms in Adolescent Marijuana Users." JAMA pediatrics 173, no. 2 (2019): 185-186.	Observational study	US	16.6	Cannabis-associated paranoia	Single item (in the past 12 months, how often have you felt anxious or paranoid during or after using marijuana?)	Age	0 (-0.339; 0.339)	1	146
	Levy et al. (2018)	Levy, Sharon, and Elissa R. Weitzman. "Acute Mental Health Symptoms in Adolescent Marijuana Users." JAMA pediatrics 173, no. 2 (2019): 185-186.	Observational study	US	16.6	Cannabis-associated paranoia	Single item (in the past 12 months, how often have you felt anxious or paranoid during or after using marijuana?)	Gender	0 (-0.339; 0.339)	1	146
	Levy et al. (2018)	Levy, Sharon, and Elissa R. Weitzman. "Acute Mental Health Symptoms in Adolescent Marijuana Users." JAMA pediatrics 173, no. 2 (2019): 185-186.	Observational study	US	16.6	Cannabis-associated paranoia	Single item (in the past 12 months, how often have you felt anxious or paranoid during or after using marijuana?)	Ethnic group	0 (-0.339; 0.339)	1	146
	Levy et al. (2018)	Levy, Sharon, and Elissa R. Weitzman. "Acute Mental Health Symptoms in Adolescent Marijuana Users." JAMA pediatrics 173, no. 2 (2019): 185-186.	Observational study	US	16.6	Cannabis-associated paranoia	Single item (in the past 12 months, how often have you felt anxious or paranoid during or after using marijuana?)	General health status	0 (-0.339; 0.339)	1	146
	Levy et al. (2018)	Levy, Sharon, and Elissa R. Weitzman. "Acute Mental Health Symptoms in Adolescent Marijuana Users." JAMA pediatrics 173, no. 2 (2019): 185-186.	Observational study	US	16.6	Cannabis-associated paranoia	Single item (in the past 12 months, how often have you felt anxious or paranoid during or after using marijuana?)	Socioeconomic status	0 (-0.339; 0.339)	1	146
	Levy et al. (2018)	Levy, Sharon, and Elissa R. Weitzman. "Acute Mental Health Symptoms in Adolescent Marijuana Users." JAMA pediatrics 173, no. 2 (2019): 185-186.	Observational study	US	16.6	Cannabis-associated paranoia	Single item (in the past 12 months, how often have you felt anxious or paranoid during or after using marijuana?)	Severity of cannabis use	0.62 (0.203; 1.037)	0.003551	146
	Levy et al. (2018)	Levy, Sharon, and Elissa R. Weitzman. "Acute Mental Health Symptoms in Adolescent Marijuana Users." JAMA pediatrics 173, no. 2 (2019): 185-186.	Observational study	US	16.6	Cannabis-associated paranoia	Single item (in the past 12 months, how often have you felt anxious or paranoid during or after using marijuana?)	Severity of cannabis use	0.666 (0.266; 1.065)	0.001083	146
	Levy et al. (2018)	Levy, Sharon, and Elissa R. Weitzman. "Acute Mental Health Symptoms in Adolescent Marijuana Users." JAMA pediatrics 173, no. 2 (2019): 185-186.	Observational study	US	16.6	Cannabis-associated paranoia	Single item (in the past 12 months, how often have you felt anxious or paranoid during or after using marijuana?)	Anxiety liability	0.467 (-0.008; 0.943)	0.0541	146
	Levy et al. (2018)	Levy, Sharon, and Elissa R. Weitzman. "Acute Mental Health Symptoms in Adolescent Marijuana Users." JAMA pediatrics 173, no. 2 (2019): 185-186.	Observational study	US	16.6	Cannabis-associated paranoia	Single item (in the past 12 months, how often have you felt anxious or paranoid during or after using marijuana?)	Depression liability	0.732 (0.295; 1.168)	0.001025	146
	Barkus et al. (2008)	Barkus, Emma, and Shon Lewis. "Schizotypy and psychosis-like experiences from recreational cannabis in a non-clinical sample." Psychological Medicine 38, no. 9 (2008): 1267-1276.	Observational study	UK	22	Cannabis-associated psychosis-like symptoms	CEQ-PLE subscale	Psychosis liability	0.493 (0.32; 0.665)	3.513e-08	532
	Bianconi et al. (2016)	Bianconi, F., M. Bonomo, A. Marconi, A. Kolliakou, S. A. Stilo, C. Iyegbe, P. Gurillo Muñoz et al. "Differences in cannabis-related experiences between patients with a first episode of psychosis and controls." Psychological medicine 46, no. 5 (2016): 995-1003.	Observational study	Uk	28.5	Cannabis-associated paranoia	Single item (how often have you felt suspicious while smoking cannabis?)	Psychosis liability	0.462 (0.167; 0.756)	0.002423	188
	Bianconi et al. (2016)	Bianconi, F., M. Bonomo, A. Marconi, A. Kolliakou, S. A. Stilo, C. Iyegbe, P. Gurillo Muñoz et al. "Differences in cannabis-related experiences between patients with a first episode of psychosis and controls." Psychological medicine 46, no. 5 (2016): 995-1003.	Observational study	Uk	28.5	Cannabis-associated hallucinations	Single item (how often have your heard voices while smoking cannabis?)	Psychosis liability	0.487 (0.193; 0.782)	0.00139	189
	Bianconi et al. (2016)	Bianconi, F., M. Bonomo, A. Marconi, A. Kolliakou, S. A. Stilo, C. Iyegbe, P. Gurillo Muñoz et al. "Differences in cannabis-related experiences between patients with a first episode of psychosis and controls." Psychological medicine 46, no. 5 (2016): 995-1003.	Observational study	Uk	28.5	Cannabis-associated psychosis-like symptoms	Psychosis-like (factor), with the following indicators: How often have you had visions while smoking cannabis?; How often have you heard voices while smoking cannabis?; How often have you felt like going mad while smoking cannabis?	Psychosis liability	0.133 (-0.049; 0.315)	0.1517	469
	Bianconi et al. (2016)	Bianconi, F., M. Bonomo, A. Marconi, A. Kolliakou, S. A. Stilo, C. Iyegbe, P. Gurillo Muñoz et al. "Differences in cannabis-related experiences between patients with a first episode of psychosis and controls." Psychological medicine 46, no. 5 (2016): 995-1003.	Observational study	Uk	28.5	Cannabis-associated psychosis-like symptoms	Psychosis-like (factor), with the following indicators: How often have you had visions while smoking cannabis?; How often have you heard voices while smoking cannabis?; How often have you felt like going mad while smoking cannabis?	Cannabis strain (high in THC)	0.28 (0.098; 0.462)	0.002712	469
	Bianconi et al. (2016)	Bianconi, F., M. Bonomo, A. Marconi, A. Kolliakou, S. A. Stilo, C. Iyegbe, P. Gurillo Muñoz et al. "Differences in cannabis-related experiences between patients with a first episode of psychosis and controls." Psychological medicine 46, no. 5 (2016): 995-1003.	Observational study	Uk	28.5	Cannabis-associated psychosis-like symptoms	Psychosis-like (factor), with the following indicators: How often have you had visions while smoking cannabis?; How often have you heard voices while smoking cannabis?; How often have you felt like going mad while smoking cannabis?	Other (Cannabis beliefs)	0.328 (0.146; 0.511)	0.0004537	469
	Bianconi et al. (2016)	Bianconi, F., M. Bonomo, A. Marconi, A. Kolliakou, S. A. Stilo, C. Iyegbe, P. Gurillo Muñoz et al. "Differences in cannabis-related experiences between patients with a first episode of psychosis and controls." Psychological medicine 46, no. 5 (2016): 995-1003.	Observational study	Uk	28.5	Cannabis-associated psychosis-like symptoms	Psychosis-like (factor), with the following indicators: How often have you had visions while smoking cannabis?; How often have you heard voices while smoking cannabis?; How often have you felt like going mad while smoking cannabis?	Use of alcohol	0 (-0.196; 0.196)	1	469
	Bianconi et al. (2016)	Bianconi, F., M. Bonomo, A. Marconi, A. Kolliakou, S. A. Stilo, C. Iyegbe, P. Gurillo Muñoz et al. "Differences in cannabis-related experiences between patients with a first episode of psychosis and controls." Psychological medicine 46, no. 5 (2016): 995-1003.	Observational study	Uk	28.5	Cannabis-associated psychosis-like symptoms	Psychosis-like (factor), with the following indicators: How often have you had visions while smoking cannabis?; How often have you heard voices while smoking cannabis?; How often have you felt like going mad while smoking cannabis?	Use of nicotine	0 (-0.196; 0.196)	1	469
	Bianconi et al. (2016)	Bianconi, F., M. Bonomo, A. Marconi, A. Kolliakou, S. A. Stilo, C. Iyegbe, P. Gurillo Muñoz et al. "Differences in cannabis-related experiences between patients with a first episode of psychosis and controls." Psychological medicine 46, no. 5 (2016): 995-1003.	Observational study	Uk	28.5	Cannabis-associated psychosis-like symptoms	Psychosis-like (factor), with the following indicators: How often have you had visions while smoking cannabis?; How often have you heard voices while smoking cannabis?; How often have you felt like going mad while smoking cannabis?	Severity of cannabis use	0 (-0.196; 0.196)	1	469
	Bianconi et al. (2016)	Bianconi, F., M. Bonomo, A. Marconi, A. Kolliakou, S. A. Stilo, C. Iyegbe, P. Gurillo Muñoz et al. "Differences in cannabis-related experiences between patients with a first episode of psychosis and controls." Psychological medicine 46, no. 5 (2016): 995-1003.	Observational study	Uk	28.5	Cannabis-associated psychosis-like symptoms	Psychosis-like (factor), with the following indicators: How often have you had visions while smoking cannabis?; How often have you heard voices while smoking cannabis?; How often have you felt like going mad while smoking cannabis?	Duration of cannabis use	0 (-0.196; 0.196)	1	469
	Bianconi et al. (2016)	Bianconi, F., M. Bonomo, A. Marconi, A. Kolliakou, S. A. Stilo, C. Iyegbe, P. Gurillo Muñoz et al. "Differences in cannabis-related experiences between patients with a first episode of psychosis and controls." Psychological medicine 46, no. 5 (2016): 995-1003.	Observational study	Uk	28.5	Cannabis-associated psychosis-like symptoms	Psychosis-like (factor), with the following indicators: How often have you had visions while smoking cannabis?; How often have you heard voices while smoking cannabis?; How often have you felt like going mad while smoking cannabis?	Severity of cannabis use	0 (-0.196; 0.196)	1	469
	Curran et al. (2019)	Curran, H. Valerie, Chandni Hindocha, Celia JA Morgan, Natacha Shaban, Ravi K. Das, and Tom P. Freeman. "Which biological and self-report measures of cannabis use predict cannabis dependency and acute psychotic-like effects?." Psychological medicine 49, no. 9 (2019): 1574-1580.	Experiment	UK	20.6	Cannabis-associated psychosis-like symptoms	PSI	Age	-0.064 (-0.257; 0.128)	0.5148	416
	Curran et al. (2019)	Curran, H. Valerie, Chandni Hindocha, Celia JA Morgan, Natacha Shaban, Ravi K. Das, and Tom P. Freeman. "Which biological and self-report measures of cannabis use predict cannabis dependency and acute psychotic-like effects?." Psychological medicine 49, no. 9 (2019): 1574-1580.	Experiment	UK	20.6	Cannabis-associated psychosis-like symptoms	BPRS	Age	-0.256 (-0.45; -0.062)	0.01002	416
	Curran et al. (2019)	Curran, H. Valerie, Chandni Hindocha, Celia JA Morgan, Natacha Shaban, Ravi K. Das, and Tom P. Freeman. "Which biological and self-report measures of cannabis use predict cannabis dependency and acute psychotic-like effects?." Psychological medicine 49, no. 9 (2019): 1574-1580.	Experiment	UK	20.6	Cannabis-associated psychosis-like symptoms	PSI	Gender	-0.038 (-0.23; 0.154)	0.6982	418
	Curran et al. (2019)	Curran, H. Valerie, Chandni Hindocha, Celia JA Morgan, Natacha Shaban, Ravi K. Das, and Tom P. Freeman. "Which biological and self-report measures of cannabis use predict cannabis dependency and acute psychotic-like effects?." Psychological medicine 49, no. 9 (2019): 1574-1580.	Experiment	UK	20.6	Cannabis-associated psychosis-like symptoms	BPRS	Gender	-0.46 (-0.657; -0.263)	6.313e-06	418
	Curran et al. (2019)	Curran, H. Valerie, Chandni Hindocha, Celia JA Morgan, Natacha Shaban, Ravi K. Das, and Tom P. Freeman. "Which biological and self-report measures of cannabis use predict cannabis dependency and acute psychotic-like effects?." Psychological medicine 49, no. 9 (2019): 1574-1580.	Experiment	UK	20.6	Cannabis-associated psychosis-like symptoms	PSI	Cannabis strain (high in THC)	-0.167 (-0.372; 0.039)	0.1137	366
	Curran et al. (2019)	Curran, H. Valerie, Chandni Hindocha, Celia JA Morgan, Natacha Shaban, Ravi K. Das, and Tom P. Freeman. "Which biological and self-report measures of cannabis use predict cannabis dependency and acute psychotic-like effects?." Psychological medicine 49, no. 9 (2019): 1574-1580.	Experiment	UK	20.6	Cannabis-associated psychosis-like symptoms	BPRS	Cannabis strain (high in THC)	-0.056 (-0.261; 0.149)	0.593	366
	Curran et al. (2019)	Curran, H. Valerie, Chandni Hindocha, Celia JA Morgan, Natacha Shaban, Ravi K. Das, and Tom P. Freeman. "Which biological and self-report measures of cannabis use predict cannabis dependency and acute psychotic-like effects?." Psychological medicine 49, no. 9 (2019): 1574-1580.	Experiment	UK	20.6	Cannabis-associated psychosis-like symptoms	PSI	Cannabis strain (high in CBD)	0.074 (-0.131; 0.279)	0.4801	366
	Curran et al. (2019)	Curran, H. Valerie, Chandni Hindocha, Celia JA Morgan, Natacha Shaban, Ravi K. Das, and Tom P. Freeman. "Which biological and self-report measures of cannabis use predict cannabis dependency and acute psychotic-like effects?." Psychological medicine 49, no. 9 (2019): 1574-1580.	Experiment	UK	20.6	Cannabis-associated psychosis-like symptoms	BPRS	Cannabis strain (high in CBD)	-0.134 (-0.34; 0.071)	0.2013	366
	Curran et al. (2019)	Curran, H. Valerie, Chandni Hindocha, Celia JA Morgan, Natacha Shaban, Ravi K. Das, and Tom P. Freeman. "Which biological and self-report measures of cannabis use predict cannabis dependency and acute psychotic-like effects?." Psychological medicine 49, no. 9 (2019): 1574-1580.	Experiment	UK	20.6	Cannabis-associated psychosis-like symptoms	PSI	THC-COOH levels	-0.4 (-0.614; -0.185)	0.0003014	348
	Curran et al. (2019)	Curran, H. Valerie, Chandni Hindocha, Celia JA Morgan, Natacha Shaban, Ravi K. Das, and Tom P. Freeman. "Which biological and self-report measures of cannabis use predict cannabis dependency and acute psychotic-like effects?." Psychological medicine 49, no. 9 (2019): 1574-1580.	Experiment	UK	20.6	Cannabis-associated psychosis-like symptoms	BPRS	THC-COOH levels	-0.156 (-0.368; 0.055)	0.1471	348
	Curran et al. (2019)	Curran, H. Valerie, Chandni Hindocha, Celia JA Morgan, Natacha Shaban, Ravi K. Das, and Tom P. Freeman. "Which biological and self-report measures of cannabis use predict cannabis dependency and acute psychotic-like effects?." Psychological medicine 49, no. 9 (2019): 1574-1580.	Experiment	UK	20.6	Cannabis-associated psychosis-like symptoms	PSI	Cannabis strain (high in CBD)	0.142 (-0.051; 0.336)	0.1508	412
	Curran et al. (2019)	Curran, H. Valerie, Chandni Hindocha, Celia JA Morgan, Natacha Shaban, Ravi K. Das, and Tom P. Freeman. "Which biological and self-report measures of cannabis use predict cannabis dependency and acute psychotic-like effects?." Psychological medicine 49, no. 9 (2019): 1574-1580.	Experiment	UK	20.6	Cannabis-associated psychosis-like symptoms	BPRS	Cannabis strain (high in CBD)	0.248 (0.053; 0.443)	0.01304	412
	Curran et al. (2019)	Curran, H. Valerie, Chandni Hindocha, Celia JA Morgan, Natacha Shaban, Ravi K. Das, and Tom P. Freeman. "Which biological and self-report measures of cannabis use predict cannabis dependency and acute psychotic-like effects?." Psychological medicine 49, no. 9 (2019): 1574-1580.	Experiment	UK	20.6	Cannabis-associated psychosis-like symptoms	PSI	Other (CBN in body (high))	-0.205 (-0.418; 0.008)	0.05973	344
	Curran et al. (2019)	Curran, H. Valerie, Chandni Hindocha, Celia JA Morgan, Natacha Shaban, Ravi K. Das, and Tom P. Freeman. "Which biological and self-report measures of cannabis use predict cannabis dependency and acute psychotic-like effects?." Psychological medicine 49, no. 9 (2019): 1574-1580.	Experiment	UK	20.6	Cannabis-associated psychosis-like symptoms	BPRS	Other (CBN in body (high))	-0.234 (-0.447; -0.02)	0.03239	344
	Curran et al. (2019)	Curran, H. Valerie, Chandni Hindocha, Celia JA Morgan, Natacha Shaban, Ravi K. Das, and Tom P. Freeman. "Which biological and self-report measures of cannabis use predict cannabis dependency and acute psychotic-like effects?." Psychological medicine 49, no. 9 (2019): 1574-1580.	Experiment	UK	20.6	Cannabis-associated psychosis-like symptoms	PSI	THC-COOH levels	-0.136 (-0.348; 0.076)	0.2088	344
	Curran et al. (2019)	Curran, H. Valerie, Chandni Hindocha, Celia JA Morgan, Natacha Shaban, Ravi K. Das, and Tom P. Freeman. "Which biological and self-report measures of cannabis use predict cannabis dependency and acute psychotic-like effects?." Psychological medicine 49, no. 9 (2019): 1574-1580.	Experiment	UK	20.6	Cannabis-associated psychosis-like symptoms	BPRS	THC-COOH levels	-0.175 (-0.387; 0.038)	0.108	344
	Curran et al. (2019)	Curran, H. Valerie, Chandni Hindocha, Celia JA Morgan, Natacha Shaban, Ravi K. Das, and Tom P. Freeman. "Which biological and self-report measures of cannabis use predict cannabis dependency and acute psychotic-like effects?." Psychological medicine 49, no. 9 (2019): 1574-1580.	Experiment	UK	20.6	Cannabis-associated psychosis-like symptoms	PSI	Age of onset (cannabis use)	0.421 (0.224; 0.618)	3.542e-05	413
	Curran et al. (2019)	Curran, H. Valerie, Chandni Hindocha, Celia JA Morgan, Natacha Shaban, Ravi K. Das, and Tom P. Freeman. "Which biological and self-report measures of cannabis use predict cannabis dependency and acute psychotic-like effects?." Psychological medicine 49, no. 9 (2019): 1574-1580.	Experiment	UK	20.6	Cannabis-associated psychosis-like symptoms	BPRS	Age of onset (cannabis use)	0.064 (-0.129; 0.257)	0.5164	413
	Curran et al. (2019)	Curran, H. Valerie, Chandni Hindocha, Celia JA Morgan, Natacha Shaban, Ravi K. Das, and Tom P. Freeman. "Which biological and self-report measures of cannabis use predict cannabis dependency and acute psychotic-like effects?." Psychological medicine 49, no. 9 (2019): 1574-1580.	Experiment	UK	20.6	Cannabis-associated psychosis-like symptoms	PSI	Cannabis strain (high in THC)	-0.152 (-0.346; 0.041)	0.1237	413
	Curran et al. (2019)	Curran, H. Valerie, Chandni Hindocha, Celia JA Morgan, Natacha Shaban, Ravi K. Das, and Tom P. Freeman. "Which biological and self-report measures of cannabis use predict cannabis dependency and acute psychotic-like effects?." Psychological medicine 49, no. 9 (2019): 1574-1580.	Experiment	UK	20.6	Cannabis-associated psychosis-like symptoms	BPRS	Cannabis strain (high in THC)	-0.146 (-0.34; 0.047)	0.1392	413
	Henquet et al. (2016)	Henquet, Cécile, Araceli Rosa, Lydia Krabbendam, Sergi Papiol, Lourdes Fa_anás, Marjan Drukker, Johannes G. Ramaekers, and Jim van Os. "An experimental study of catechol-o-methyltransferase Val 158 Met moderation of _-9-tetrahydrocannabinol-induced effects on psychosis and cognition." Neuropsychopharmacology 31, no. 12 (2006): 2748.	Experiment	Netherlands	27.4	Cannabis-associated psychosis-like symptoms	CAPE (positive dimension)	COMT	0.146 (-0.118; 0.411)	0.2787	222
	Cuttler et al. (2016)	Cuttler, Carrie, Laurie K. Mischley, and Michelle Sexton. "Sex differences in cannabis use and effects: a cross-sectional survey of cannabis users." Cannabis and cannabinoid research 1, no. 1 (2016): 166-175.	Observational study	US	33.72	Cannabis-associated paranoia	Single item (acute effects of cannabis (paranoia))	Gender	-0.031 (-0.157; 0.095)	0.6289	2374
	Cuttler et al. (2016)	Cuttler, Carrie, Laurie K. Mischley, and Michelle Sexton. "Sex differences in cannabis use and effects: a cross-sectional survey of cannabis users." Cannabis and cannabinoid research 1, no. 1 (2016): 166-175.	Observational study	US	33.72	Cannabis-associated hallucinations	Single item (acute effects of cannabis (hallucinations))	Gender	0.097 (-0.143; 0.338)	0.4266	2374
	Vadhan et al. (2017)	Vadhan, Nehal P., Cheryl M. Corcoran, Gill Bedi, John G. Keilp, and Margaret Haney. "Acute effects of smoked marijuana in marijuana smokers at clinical high-risk for psychosis: A preliminary study." Psychiatry research 257 (2017): 372-374.	Experiment	US		Cannabis-associated paranoia	VAS (paranoia)	Psychosis liability	1.23 (-0.004; 2.464)	0.0792	12
	Sami et al. (2018)	Sami, Musa, Caitlin Notley, Christos Kouimtsidis, Michael Lynskey, and Sagnik Bhattacharyya. "Psychotic-like experiences with cannabis use predict cannabis cessation and desire to quit: a cannabis discontinuation hypothesis." Psychological medicine 49, no. 1 (2019): 103-112.	Observational study	UK	29.5	Cannabis-associated psychosis-like symptoms	CEQ-PLE	Severity of cannabis use	-0.683 (-0.825; -0.541)	2e-20	1099
	Sami et al. (2018)	Sami, Musa, Caitlin Notley, Christos Kouimtsidis, Michael Lynskey, and Sagnik Bhattacharyya. "Psychotic-like experiences with cannabis use predict cannabis cessation and desire to quit: a cannabis discontinuation hypothesis." Psychological medicine 49, no. 1 (2019): 103-112.	Observational study	UK	29.5	Cannabis-associated psychosis-like symptoms	CEQ-PLE	Gender	-0.025 (-0.274; 0.225)	0.8472	259
	Sami et al. (2018)	Sami, Musa, Caitlin Notley, Christos Kouimtsidis, Michael Lynskey, and Sagnik Bhattacharyya. "Psychotic-like experiences with cannabis use predict cannabis cessation and desire to quit: a cannabis discontinuation hypothesis." Psychological medicine 49, no. 1 (2019): 103-112.	Observational study	UK	29.5	Cannabis-associated psychosis-like symptoms	CEQ-PLE	Gender	-0.138 (-0.306; 0.03)	0.1087	829
	Sami et al. (2018)	Sami, Musa, Caitlin Notley, Christos Kouimtsidis, Michael Lynskey, and Sagnik Bhattacharyya. "Psychotic-like experiences with cannabis use predict cannabis cessation and desire to quit: a cannabis discontinuation hypothesis." Psychological medicine 49, no. 1 (2019): 103-112.	Observational study	UK	29.5	Cannabis-associated psychosis-like symptoms	CEQ-PLE	Other (Intention to quit)	0.798 (0.616; 0.98)	3.5e-17	839
	Spindle1 et al. (2018)	Spindle, Tory R., Edward J. Cone, Nicolas J. Schlienz, John M. Mitchell, George E. Bigelow, Ronald Flegel, Eugene Hayes, and Ryan Vandrey. "Acute effects of smoked and vaporized cannabis in healthy adults who infrequently use cannabis: a crossover trial." JAMA network open 1, no. 7 (2018): e184841-e184841.	Experiment	US	27.3	Cannabis-associated paranoia	DEQ	Single dose THC (versus placebo)	0.309 (-0.177; 0.796)	0.2127	17
	Spindle1 et al. (2018)	Spindle, Tory R., Edward J. Cone, Nicolas J. Schlienz, John M. Mitchell, George E. Bigelow, Ronald Flegel, Eugene Hayes, and Ryan Vandrey. "Acute effects of smoked and vaporized cannabis in healthy adults who infrequently use cannabis: a crossover trial." JAMA network open 1, no. 7 (2018): e184841-e184841.	Experiment	US	27.3	Cannabis-associated paranoia	DEQ	Single dose THC (versus placebo)	0.455 (-0.044; 0.954)	0.07407	17
	Spindle1 et al. (2018)	Spindle, Tory R., Edward J. Cone, Nicolas J. Schlienz, John M. Mitchell, George E. Bigelow, Ronald Flegel, Eugene Hayes, and Ryan Vandrey. "Acute effects of smoked and vaporized cannabis in healthy adults who infrequently use cannabis: a crossover trial." JAMA network open 1, no. 7 (2018): e184841-e184841.	Experiment	US	27.3	Cannabis-associated paranoia	DEQ	Single dose THC (versus placebo)	0.467 (-0.033; 0.968)	0.06725	17
	Spindle1 et al. (2018)	Spindle, Tory R., Edward J. Cone, Nicolas J. Schlienz, John M. Mitchell, George E. Bigelow, Ronald Flegel, Eugene Hayes, and Ryan Vandrey. "Acute effects of smoked and vaporized cannabis in healthy adults who infrequently use cannabis: a crossover trial." JAMA network open 1, no. 7 (2018): e184841-e184841.	Experiment	US	27.3	Cannabis-associated paranoia	DEQ	Single dose THC (versus placebo)	0.58 (0.066; 1.094)	0.02693	17
	Spindle3 et al. (2020)	Spindle, Tory R., Edward J. Cone, Elia Goffi, Elise M. Weerts, John M. Mitchell, Ruth E. Winecker, George E. Bigelow, Ronald R. Flegel, and Ryan Vandrey. "Pharmacodynamic effects of vaporized and oral cannabidiol (CBD) and vaporized CBD-dominant cannabis in infrequent cannabis users." Drug and Alcohol Dependence (2020): 107937.	Experiment	US	31	Cannabis-associated paranoia	Single item (do you feel an unpleasant drug effect? (paranoid))	Single dose THC (versus placebo)	0.269 (-0.201; 0.74)	0.2615	18
	Schlienz et al. (2020)	Schlienz, Nicolas J., Tory R. Spindle, Edward J. Cone, Evan S. Herrmann, George E. Bigelow, John M. Mitchell, Ronald Flegel, Charles LoDico, and Ryan Vandrey. "Pharmacodynamic dose effects of oral cannabis ingestion in healthy adults who infrequently use cannabis." Drug and alcohol dependence (2020): 107969.	Experiment	US	25.2	Cannabis-associated paranoia	VAS (paranoia)	Single dose THC (versus placebo)	2.619 (1.618; 3.619)	2.889e-07	17
	Schlienz et al. (2020)	Schlienz, Nicolas J., Tory R. Spindle, Edward J. Cone, Evan S. Herrmann, George E. Bigelow, John M. Mitchell, Ronald Flegel, Charles LoDico, and Ryan Vandrey. "Pharmacodynamic dose effects of oral cannabis ingestion in healthy adults who infrequently use cannabis." Drug and alcohol dependence (2020): 107969.	Experiment	US	25.2	Cannabis-associated paranoia	VAS (paranoia)	Single dose THC (versus placebo)	4.193 (2.706; 5.681)	3.292e-08	17
	Schlienz et al. (2020)	Schlienz, Nicolas J., Tory R. Spindle, Edward J. Cone, Evan S. Herrmann, George E. Bigelow, John M. Mitchell, Ronald Flegel, Charles LoDico, and Ryan Vandrey. "Pharmacodynamic dose effects of oral cannabis ingestion in healthy adults who infrequently use cannabis." Drug and alcohol dependence (2020): 107969.	Experiment	US	25.2	Cannabis-associated paranoia	VAS (paranoia)	Single dose THC (versus placebo)	7.366 (4.845; 9.887)	1.026e-08	17
	Fuente et al. (2019)	de la Fuente, Alethia, Federico Zamberlan, Andrés Sánchez Ferrán, Facundo Carrillo, Enzo Tagliazucchi, and Carla Pallavicini. "Over eight hundred cannabis strains characterized by the relationship between their psychoactive effects, perceptual profiles, and chemical compositions." bioRxiv (2019): 759696.	Observational study	Worldwide		Cannabis-associated paranoia	Unpleasant drug effects (mean, paranoia)	Other (Indica (vs. sativa))	-0.248 (-0.441; -0.056)	0.01196	436
	Fuente et al. (2019)	de la Fuente, Alethia, Federico Zamberlan, Andrés Sánchez Ferrán, Facundo Carrillo, Enzo Tagliazucchi, and Carla Pallavicini. "Over eight hundred cannabis strains characterized by the relationship between their psychoactive effects, perceptual profiles, and chemical compositions." bioRxiv (2019): 759696.	Observational study	Worldwide		Cannabis-associated paranoia	Unpleasant drug effects (mean, paranoia)	Other (Indica (vs. hybrid))	-0.159 (-0.311; -0.007)	0.04012	716
	Fuente et al. (2019)	de la Fuente, Alethia, Federico Zamberlan, Andrés Sánchez Ferrán, Facundo Carrillo, Enzo Tagliazucchi, and Carla Pallavicini. "Over eight hundred cannabis strains characterized by the relationship between their psychoactive effects, perceptual profiles, and chemical compositions." bioRxiv (2019): 759696.	Observational study	Worldwide		Cannabis-associated paranoia	Unpleasant drug effects (mean, paranoia)	Other (Hybrid (vs. sativa))	-0.075 (-0.252; 0.101)	0.4012	622
	D'Souza et al. (2004)	D'Souza, Deepak Cyril, Edward Perry, Lisa MacDougall, Yola Ammerman, Thomas Cooper, Gabriel Braley, Ralitza Gueorguieva, and John Harrison Krystal. "The psychotomimetic effects of intravenous delta-9-tetrahydrocannabinol in healthy individuals: implications for psychosis." Neuropsychopharmacology 29, no. 8 (2004): 1558-1572.	Experiment	US	29	Cannabis-associated psychosis-like symptoms	PANSS (positive)	Psychosis liability	0.126 (-0.259; 0.511)	0.5224	105
	D'Souza et al. (2005)	D’Souza, Deepak Cyril, Walid Michel Abi-Saab, Steven Madonick, Kimberlee Forselius-Bielen, Anne Doersch, Gabriel Braley, Ralitza Gueorguieva, Thomas B. Cooper, and John Harrison Krystal. "Delta-9-tetrahydrocannabinol effects in schizophrenia: implications for cognition, psychosis, and addiction." Biological psychiatry 57, no. 6 (2005): 594-608.	Experiment	US	44	Cannabis-associated psychosis-like symptoms	PANSS (positive)	Single dose THC (versus placebo)	0.762 (0.287; 1.236)	0.001657	22
	D'Souza et al. (2005)	D’Souza, Deepak Cyril, Walid Michel Abi-Saab, Steven Madonick, Kimberlee Forselius-Bielen, Anne Doersch, Gabriel Braley, Ralitza Gueorguieva, Thomas B. Cooper, and John Harrison Krystal. "Delta-9-tetrahydrocannabinol effects in schizophrenia: implications for cognition, psychosis, and addiction." Biological psychiatry 57, no. 6 (2005): 594-608.	Experiment	US	44	Cannabis-associated psychosis-like symptoms	PANSS (positive)	Single dose THC (versus placebo)	1.051 (0.53; 1.572)	7.6e-05	22
	Krebs et al. (2014)	Krebs, M. O., Y. Morvan, T. Jay, R. Gaillard, and O. Kebir. "Psychotomimetic effects at initiation of cannabis use are associated with cannabinoid receptor 1 (CNR1) variants in healthy students." Molecular psychiatry 19, no. 4 (2014): 402-403.	Observational study	France	19.8	Cannabis-associated psychosis-like symptoms	CSE	Gender	0.315 (0.012; 0.618)	0.04138	544
	Krebs et al. (2014)	Krebs, M. O., Y. Morvan, T. Jay, R. Gaillard, and O. Kebir. "Psychotomimetic effects at initiation of cannabis use are associated with cannabinoid receptor 1 (CNR1) variants in healthy students." Molecular psychiatry 19, no. 4 (2014): 402-403.	Observational study	France	19.8	Cannabis-associated psychosis-like symptoms	CSE	Depression liability	0.049 (-0.273; 0.371)	0.7668	522
	Krebs et al. (2014)	Krebs, M. O., Y. Morvan, T. Jay, R. Gaillard, and O. Kebir. "Psychotomimetic effects at initiation of cannabis use are associated with cannabinoid receptor 1 (CNR1) variants in healthy students." Molecular psychiatry 19, no. 4 (2014): 402-403.	Observational study	France	19.8	Cannabis-associated psychosis-like symptoms	CSE	Psychosis liability	-0.096 (-0.919; 0.726)	0.8182	379
	Krebs et al. (2014)	Krebs, M. O., Y. Morvan, T. Jay, R. Gaillard, and O. Kebir. "Psychotomimetic effects at initiation of cannabis use are associated with cannabinoid receptor 1 (CNR1) variants in healthy students." Molecular psychiatry 19, no. 4 (2014): 402-403.	Observational study	France	19.8	Cannabis-associated psychosis-like symptoms	CSE	Age	-0.119 (-0.481; 0.243)	0.5204	544
	Krebs et al. (2014)	Krebs, M. O., Y. Morvan, T. Jay, R. Gaillard, and O. Kebir. "Psychotomimetic effects at initiation of cannabis use are associated with cannabinoid receptor 1 (CNR1) variants in healthy students." Molecular psychiatry 19, no. 4 (2014): 402-403.	Observational study	France	19.8	Cannabis-associated psychosis-like symptoms	CSE	CNR1	-0.212 (-0.381; -0.043)	0.01433	544
	Krebs et al. (2014)	Krebs, M. O., Y. Morvan, T. Jay, R. Gaillard, and O. Kebir. "Psychotomimetic effects at initiation of cannabis use are associated with cannabinoid receptor 1 (CNR1) variants in healthy students." Molecular psychiatry 19, no. 4 (2014): 402-403.	Observational study	France	19.8	Cannabis-associated psychosis-like symptoms	CSE	CNR1	0.166 (-0.003; 0.335)	0.05401	543
	Krebs et al. (2014)	Krebs, M. O., Y. Morvan, T. Jay, R. Gaillard, and O. Kebir. "Psychotomimetic effects at initiation of cannabis use are associated with cannabinoid receptor 1 (CNR1) variants in healthy students." Molecular psychiatry 19, no. 4 (2014): 402-403.	Observational study	France	19.8	Cannabis-associated psychosis-like symptoms	CSE	CNR1	-0.064 (-0.233; 0.105)	0.4611	540
	Krebs et al. (2014)	Krebs, M. O., Y. Morvan, T. Jay, R. Gaillard, and O. Kebir. "Psychotomimetic effects at initiation of cannabis use are associated with cannabinoid receptor 1 (CNR1) variants in healthy students." Molecular psychiatry 19, no. 4 (2014): 402-403.	Observational study	France	19.8	Cannabis-associated psychosis-like symptoms	CSE	CNR1	0.103 (-0.067; 0.273)	0.2338	535
	Krebs et al. (2014)	Krebs, M. O., Y. Morvan, T. Jay, R. Gaillard, and O. Kebir. "Psychotomimetic effects at initiation of cannabis use are associated with cannabinoid receptor 1 (CNR1) variants in healthy students." Molecular psychiatry 19, no. 4 (2014): 402-403.	Observational study	France	19.8	Cannabis-associated psychosis-like symptoms	CSE	CNR1	-0.089 (-0.257; 0.08)	0.3024	544
	Krebs et al. (2014)	Krebs, M. O., Y. Morvan, T. Jay, R. Gaillard, and O. Kebir. "Psychotomimetic effects at initiation of cannabis use are associated with cannabinoid receptor 1 (CNR1) variants in healthy students." Molecular psychiatry 19, no. 4 (2014): 402-403.	Observational study	France	19.8	Cannabis-associated psychosis-like symptoms	CSE	COMT	0.165 (-0.004; 0.335)	0.05656	538
	Krebs et al. (2014)	Krebs, M. O., Y. Morvan, T. Jay, R. Gaillard, and O. Kebir. "Psychotomimetic effects at initiation of cannabis use are associated with cannabinoid receptor 1 (CNR1) variants in healthy students." Molecular psychiatry 19, no. 4 (2014): 402-403.	Observational study	France	19.8	Cannabis-associated psychosis-like symptoms	CSE	BDNF	0.107 (-0.062; 0.276)	0.216	538
	Krebs et al. (2014)	Krebs, M. O., Y. Morvan, T. Jay, R. Gaillard, and O. Kebir. "Psychotomimetic effects at initiation of cannabis use are associated with cannabinoid receptor 1 (CNR1) variants in healthy students." Molecular psychiatry 19, no. 4 (2014): 402-403.	Observational study	France	19.8	Cannabis-associated psychosis-like symptoms	CSE	AKT1	0.105 (-0.065; 0.274)	0.227	538
	Krebs et al. (2014)	Krebs, M. O., Y. Morvan, T. Jay, R. Gaillard, and O. Kebir. "Psychotomimetic effects at initiation of cannabis use are associated with cannabinoid receptor 1 (CNR1) variants in healthy students." Molecular psychiatry 19, no. 4 (2014): 402-403.	Observational study	France	19.8	Cannabis-associated psychosis-like symptoms	CSE	AKT1	-0.094 (-0.264; 0.075)	0.2749	538
	Barkus et al. (2006)	Barkus, Emma J., John Stirling, Richard S. Hopkins, and Shon Lewis. "Cannabis-induced psychosis-like experiences are associated with high schizotypy." Psychopathology 39, no. 4 (2006): 175-178.	Observational study	UK	22.1	Cannabis-associated psychosis-like symptoms	CEQ	Psychosis liability	0.873 (0.441; 1.305)	0.0001423	99
	Barkus et al. (2006)	Barkus, Emma J., John Stirling, Richard S. Hopkins, and Shon Lewis. "Cannabis-induced psychosis-like experiences are associated with high schizotypy." Psychopathology 39, no. 4 (2006): 175-178.	Observational study	UK	22.1	Cannabis-associated psychosis-like symptoms	CEQ	Psychosis liability	0.699 (0.28; 1.119)	0.0015	99
	Barkus et al. (2006)	Barkus, Emma J., John Stirling, Richard S. Hopkins, and Shon Lewis. "Cannabis-induced psychosis-like experiences are associated with high schizotypy." Psychopathology 39, no. 4 (2006): 175-178.	Observational study	UK	22.1	Cannabis-associated psychosis-like symptoms	CEQ	Psychosis liability	0.98 (0.539; 1.421)	3.266e-05	99
	Winstock et al. (2013)	Winstock, Adam R., and Monica J. Barratt. "Synthetic cannabis: a comparison of patterns of use and effect profile with natural cannabis in a large global sample." Drug and alcohol dependence 131, no. 1-2 (2013): 106-111.	Observational study	Worldwide		Cannabis-associated paranoia	Single Item (effects when using cannabis (paranoia))	Cannabis strain (high in THC)	0.304 (0.234; 0.373)	8.697e-18	837
	Englund et al. (2016)	Englund, Amir, Zerrin Atakan, Aleksandra Kralj, Nigel Tunstall, Robin Murray, and Paul Morrison. "The effect of five day dosing with THCV on THC-induced cognitive, psychological and physiological effects in healthy male human volunteers: A placebo-controlled, double-blind, crossover pilot trial." Journal of Psychopharmacology 30, no. 2 (2016): 140-151.	Experiment	UK	23.8	Cannabis-associated psychosis-like symptoms	CAPE (positive dimension)	Single dose THC (versus placebo)	0.16 (-0.464; 0.784)	0.6149	10
	Stone et al. (2012)	Stone, J.M., Morrison, P.D., Brugger, S., Nottage, J., Bhattacharyya, S., Sumich, A., Wilson, D., Tunstall, N., Feilding, A., Brenneisen, R. and McGuire, P., 2012. Communication breakdown: delta-9 tetrahydrocannabinol effects on pre-speech neural coherence. Molecular psychiatry, 17(6), pp.568-569.	Experiment	UK	26	Cannabis-associated paranoia	SECQ (paranoia)	Single dose THC (versus placebo)	0.767 (0.192; 1.341)	0.008894	16
	Morgan et al. (2018)	Morgan CJA, Freeman TP, Hindocha C, Schafer G, Gardner C, Curran HV (2018) Individual and combined effects of acute delta-9-tetrahydrocannabinol and cannabidiol on psychotomimetic symptoms and memory function. Transl Psychiatry 8:181	Experiment	UK	22	Cannabis-associated delusions	PSI (delusion subscale)	Single dose THC (versus placebo)	0.045 (-0.239; 0.328)	0.7579	48
	Morgan et al. (2018)	Morgan CJA, Freeman TP, Hindocha C, Schafer G, Gardner C, Curran HV (2018) Individual and combined effects of acute delta-9-tetrahydrocannabinol and cannabidiol on psychotomimetic symptoms and memory function. Transl Psychiatry 8:181	Experiment	UK	22	Cannabis-associated paranoia	PSI (paranoia subscale)	Single dose THC (versus placebo)	0.181 (-0.105; 0.466)	0.2144	48
	Morgan et al. (2018)	Morgan CJA, Freeman TP, Hindocha C, Schafer G, Gardner C, Curran HV (2018) Individual and combined effects of acute delta-9-tetrahydrocannabinol and cannabidiol on psychotomimetic symptoms and memory function. Transl Psychiatry 8:181	Experiment	UK	22	Cannabis-associated psychosis-like symptoms	BPRS (positive subscale)	Single dose THC (versus placebo)	0.284 (-0.005; 0.572)	0.05386	48
	Morgan et al. (2018)	Morgan CJA, Freeman TP, Hindocha C, Schafer G, Gardner C, Curran HV (2018) Individual and combined effects of acute delta-9-tetrahydrocannabinol and cannabidiol on psychotomimetic symptoms and memory function. Transl Psychiatry 8:181	Experiment	UK	22	Cannabis-associated psychosis-like symptoms	BPRS (positive subscale)	CBD (administration)	-0.192 (-0.477; 0.094)	0.1878	48
	Morgan et al. (2018)	Morgan CJA, Freeman TP, Hindocha C, Schafer G, Gardner C, Curran HV (2018) Individual and combined effects of acute delta-9-tetrahydrocannabinol and cannabidiol on psychotomimetic symptoms and memory function. Transl Psychiatry 8:181	Experiment	UK	22	Cannabis-associated delusions	PSI (delusion subscale)	CBD (administration)	-0.029 (-0.312; 0.254)	0.8389	48
	Morgan et al. (2018)	Morgan CJA, Freeman TP, Hindocha C, Schafer G, Gardner C, Curran HV (2018) Individual and combined effects of acute delta-9-tetrahydrocannabinol and cannabidiol on psychotomimetic symptoms and memory function. Transl Psychiatry 8:181	Experiment	UK	22	Cannabis-associated paranoia	PSI (paranoia subscale)	CBD (administration)	-0.071 (-0.355; 0.212)	0.6213	48
	Colizzi et al. (2019)	Colizzi, Marco, Nathalie Weltens, Philip McGuire, David Lythgoe, Steve Williams, Lukas Van Oudenhove, and Sagnik Bhattacharyya. "Delta-9-tetrahydrocannabinol increases striatal glutamate levels in healthy individuals: implications for psychosis." Molecular psychiatry (2019): 1-10.	Experiment	UK	24.44	Cannabis-associated psychosis-like symptoms	PANSS (positive)	Single dose THC (versus placebo)	1.025 (0.423; 1.627)	0.001678	48
	Colizzi et al. (2019)	Colizzi, Marco, Nathalie Weltens, Philip McGuire, David Lythgoe, Steve Williams, Lukas Van Oudenhove, and Sagnik Bhattacharyya. "Delta-9-tetrahydrocannabinol increases striatal glutamate levels in healthy individuals: implications for psychosis." Molecular psychiatry (2019): 1-10.	Experiment	UK	24.44	Cannabis-associated psychosis-like symptoms	PANSS (positive)	Glutamate	-1.373 (-2.532; -0.214)	0.03586	16
	Colizzi et al. (2019)	Colizzi, Marco, Nathalie Weltens, Philip McGuire, David Lythgoe, Steve Williams, Lukas Van Oudenhove, and Sagnik Bhattacharyya. "Delta-9-tetrahydrocannabinol increases striatal glutamate levels in healthy individuals: implications for psychosis." Molecular psychiatry (2019): 1-10.	Experiment	UK	24.44	Cannabis-associated psychosis-like symptoms	PANSS (positive)	Other (Glutamate levels (change following THC))	-0.325 (-1.389; 0.738)	0.5581	16
	Sami et al. (2020)	Sami, M., Quattrone, D., Ferraro, L., Tripoli, G., Cascia, E., Gayer-Anderson, C., . . . Forti, M. (2020). Association of extent of cannabis use and psychotic like intoxication experiences in a multi-national sample of first episode psychosis patients and controls. Psychological Medicine, 1-9. doi:10.1017/S0033291720000847	Observational study	UK, Holland, Spain, France, Italy, Brazil	31.4	Cannabis-associated psychosis-like symptoms	CEQ	Psychosis liability	0.451 (0.337; 0.565)	1.772e-14	1213
	Sami et al. (2020)	Sami, M., Quattrone, D., Ferraro, L., Tripoli, G., Cascia, E., Gayer-Anderson, C., . . . Forti, M. (2020). Association of extent of cannabis use and psychotic like intoxication experiences in a multi-national sample of first episode psychosis patients and controls. Psychological Medicine, 1-9. doi:10.1017/S0033291720000847	Observational study	UK, Holland, Spain, France, Italy, Brazil	31.4	Cannabis-associated psychosis-like symptoms	CEQ	Severity of cannabis use	0.355 (0.241; 0.468)	1.173e-09	1213
	Sami et al. (2020)	Sami, M., Quattrone, D., Ferraro, L., Tripoli, G., Cascia, E., Gayer-Anderson, C., . . . Forti, M. (2020). Association of extent of cannabis use and psychotic like intoxication experiences in a multi-national sample of first episode psychosis patients and controls. Psychological Medicine, 1-9. doi:10.1017/S0033291720000847	Observational study	UK, Holland, Spain, France, Italy, Brazil	31.4	Cannabis-associated psychosis-like symptoms	CEQ	Cannabis strain (high in THC)	0.136 (0.023; 0.248)	0.01857	1213
	Sami et al. (2020)	Sami, M., Quattrone, D., Ferraro, L., Tripoli, G., Cascia, E., Gayer-Anderson, C., . . . Forti, M. (2020). Association of extent of cannabis use and psychotic like intoxication experiences in a multi-national sample of first episode psychosis patients and controls. Psychological Medicine, 1-9. doi:10.1017/S0033291720000847	Observational study	UK, Holland, Spain, France, Italy, Brazil	31.4	Cannabis-associated psychosis-like symptoms	CEQ	Severity of cannabis use	0.354 (0.241; 0.468)	1.245e-09	1213
	Sami et al. (2020)	Sami, M., Quattrone, D., Ferraro, L., Tripoli, G., Cascia, E., Gayer-Anderson, C., . . . Forti, M. (2020). Association of extent of cannabis use and psychotic like intoxication experiences in a multi-national sample of first episode psychosis patients and controls. Psychological Medicine, 1-9. doi:10.1017/S0033291720000847	Observational study	UK, Holland, Spain, France, Italy, Brazil	31.4	Cannabis-associated psychosis-like symptoms	CEQ	Other (Frequency (heavy))	0.2 (0.088; 0.313)	0.0005168	1213
	Sami et al. (2020)	Sami, M., Quattrone, D., Ferraro, L., Tripoli, G., Cascia, E., Gayer-Anderson, C., . . . Forti, M. (2020). Association of extent of cannabis use and psychotic like intoxication experiences in a multi-national sample of first episode psychosis patients and controls. Psychological Medicine, 1-9. doi:10.1017/S0033291720000847	Observational study	UK, Holland, Spain, France, Italy, Brazil	31.4	Cannabis-associated psychosis-like symptoms	CEQ	Other (Potency (high) x caseness interaction)	0.117 (0.004; 0.23)	0.04174	1213
	Sami et al. (2020)	Sami, M., Quattrone, D., Ferraro, L., Tripoli, G., Cascia, E., Gayer-Anderson, C., . . . Forti, M. (2020). Association of extent of cannabis use and psychotic like intoxication experiences in a multi-national sample of first episode psychosis patients and controls. Psychological Medicine, 1-9. doi:10.1017/S0033291720000847	Observational study	UK, Holland, Spain, France, Italy, Brazil	31.4	Cannabis-associated psychosis-like symptoms	CEQ	Other (Cannabis amount x caseness interaction)	0.189 (0.076; 0.302)	0.001058	1213
	Sami et al. (2020)	Sami, M., Quattrone, D., Ferraro, L., Tripoli, G., Cascia, E., Gayer-Anderson, C., . . . Forti, M. (2020). Association of extent of cannabis use and psychotic like intoxication experiences in a multi-national sample of first episode psychosis patients and controls. Psychological Medicine, 1-9. doi:10.1017/S0033291720000847	Observational study	UK, Holland, Spain, France, Italy, Brazil	31.4	Cannabis-associated psychosis-like symptoms	CEQ	Use of inhalants	0.09 (-0.022; 0.203)	0.1169	1213
	Sami et al. (2020)	Sami, M., Quattrone, D., Ferraro, L., Tripoli, G., Cascia, E., Gayer-Anderson, C., . . . Forti, M. (2020). Association of extent of cannabis use and psychotic like intoxication experiences in a multi-national sample of first episode psychosis patients and controls. Psychological Medicine, 1-9. doi:10.1017/S0033291720000847	Observational study	UK, Holland, Spain, France, Italy, Brazil	31.4	Cannabis-associated psychosis-like symptoms	CEQ	Use of inhalants	0.157 (0.045; 0.27)	0.006314	1213
	Sami et al. (2020)	Sami, M., Quattrone, D., Ferraro, L., Tripoli, G., Cascia, E., Gayer-Anderson, C., . . . Forti, M. (2020). Association of extent of cannabis use and psychotic like intoxication experiences in a multi-national sample of first episode psychosis patients and controls. Psychological Medicine, 1-9. doi:10.1017/S0033291720000847	Observational study	UK, Holland, Spain, France, Italy, Brazil	31.4	Cannabis-associated psychosis-like symptoms	CEQ	Use of crack	0.094 (-0.018; 0.207)	0.1015	1213
	Sami et al. (2020)	Sami, M., Quattrone, D., Ferraro, L., Tripoli, G., Cascia, E., Gayer-Anderson, C., . . . Forti, M. (2020). Association of extent of cannabis use and psychotic like intoxication experiences in a multi-national sample of first episode psychosis patients and controls. Psychological Medicine, 1-9. doi:10.1017/S0033291720000847	Observational study	UK, Holland, Spain, France, Italy, Brazil	31.4	Cannabis-associated psychosis-like symptoms	CEQ	Use of crack	0.167 (0.054; 0.279)	0.00386	1213
	Sami et al. (2020)	Sami, M., Quattrone, D., Ferraro, L., Tripoli, G., Cascia, E., Gayer-Anderson, C., . . . Forti, M. (2020). Association of extent of cannabis use and psychotic like intoxication experiences in a multi-national sample of first episode psychosis patients and controls. Psychological Medicine, 1-9. doi:10.1017/S0033291720000847	Observational study	UK, Holland, Spain, France, Italy, Brazil	31.4	Cannabis-associated psychosis-like symptoms	CEQ	Use of cocaine	0.026 (-0.087; 0.138)	0.6528	1213
	Sami et al. (2020)	Sami, M., Quattrone, D., Ferraro, L., Tripoli, G., Cascia, E., Gayer-Anderson, C., . . . Forti, M. (2020). Association of extent of cannabis use and psychotic like intoxication experiences in a multi-national sample of first episode psychosis patients and controls. Psychological Medicine, 1-9. doi:10.1017/S0033291720000847	Observational study	UK, Holland, Spain, France, Italy, Brazil	31.4	Cannabis-associated psychosis-like symptoms	CEQ	Use of cocaine	0.02 (-0.092; 0.133)	0.7264	1213
	Sami et al. (2020)	Sami, M., Quattrone, D., Ferraro, L., Tripoli, G., Cascia, E., Gayer-Anderson, C., . . . Forti, M. (2020). Association of extent of cannabis use and psychotic like intoxication experiences in a multi-national sample of first episode psychosis patients and controls. Psychological Medicine, 1-9. doi:10.1017/S0033291720000847	Observational study	UK, Holland, Spain, France, Italy, Brazil	31.4	Cannabis-associated psychosis-like symptoms	CEQ	Use of stimulants	0.063 (-0.05; 0.175)	0.276	1213
	Sami et al. (2020)	Sami, M., Quattrone, D., Ferraro, L., Tripoli, G., Cascia, E., Gayer-Anderson, C., . . . Forti, M. (2020). Association of extent of cannabis use and psychotic like intoxication experiences in a multi-national sample of first episode psychosis patients and controls. Psychological Medicine, 1-9. doi:10.1017/S0033291720000847	Observational study	UK, Holland, Spain, France, Italy, Brazil	31.4	Cannabis-associated psychosis-like symptoms	CEQ	Use of stimulants	0.026 (-0.087; 0.138)	0.6528	1213
	Sami et al. (2020)	Sami, M., Quattrone, D., Ferraro, L., Tripoli, G., Cascia, E., Gayer-Anderson, C., . . . Forti, M. (2020). Association of extent of cannabis use and psychotic like intoxication experiences in a multi-national sample of first episode psychosis patients and controls. Psychological Medicine, 1-9. doi:10.1017/S0033291720000847	Observational study	UK, Holland, Spain, France, Italy, Brazil	31.4	Cannabis-associated psychosis-like symptoms	CEQ	Use of sedatives	0.103 (-0.01; 0.215)	0.07389	1213
	Sami et al. (2020)	Sami, M., Quattrone, D., Ferraro, L., Tripoli, G., Cascia, E., Gayer-Anderson, C., . . . Forti, M. (2020). Association of extent of cannabis use and psychotic like intoxication experiences in a multi-national sample of first episode psychosis patients and controls. Psychological Medicine, 1-9. doi:10.1017/S0033291720000847	Observational study	UK, Holland, Spain, France, Italy, Brazil	31.4	Cannabis-associated psychosis-like symptoms	CEQ	Use of sedatives	0.141 (0.029; 0.254)	0.01415	1213
	Sami et al. (2020)	Sami, M., Quattrone, D., Ferraro, L., Tripoli, G., Cascia, E., Gayer-Anderson, C., . . . Forti, M. (2020). Association of extent of cannabis use and psychotic like intoxication experiences in a multi-national sample of first episode psychosis patients and controls. Psychological Medicine, 1-9. doi:10.1017/S0033291720000847	Observational study	UK, Holland, Spain, France, Italy, Brazil	31.4	Cannabis-associated psychosis-like symptoms	CEQ	Use of opioids	-0.053 (-0.165; 0.06)	0.3578	1213
	Sami et al. (2020)	Sami, M., Quattrone, D., Ferraro, L., Tripoli, G., Cascia, E., Gayer-Anderson, C., . . . Forti, M. (2020). Association of extent of cannabis use and psychotic like intoxication experiences in a multi-national sample of first episode psychosis patients and controls. Psychological Medicine, 1-9. doi:10.1017/S0033291720000847	Observational study	UK, Holland, Spain, France, Italy, Brazil	31.4	Cannabis-associated psychosis-like symptoms	CEQ	Use of opioids	-0.111 (-0.223; 0.002)	0.05402	1213
	Sami et al. (2020)	Sami, M., Quattrone, D., Ferraro, L., Tripoli, G., Cascia, E., Gayer-Anderson, C., . . . Forti, M. (2020). Association of extent of cannabis use and psychotic like intoxication experiences in a multi-national sample of first episode psychosis patients and controls. Psychological Medicine, 1-9. doi:10.1017/S0033291720000847	Observational study	UK, Holland, Spain, France, Italy, Brazil	31.4	Cannabis-associated psychosis-like symptoms	CEQ	Use of hallucinogens	-0.068 (-0.181; 0.044)	0.2344	1213
	Sami et al. (2020)	Sami, M., Quattrone, D., Ferraro, L., Tripoli, G., Cascia, E., Gayer-Anderson, C., . . . Forti, M. (2020). Association of extent of cannabis use and psychotic like intoxication experiences in a multi-national sample of first episode psychosis patients and controls. Psychological Medicine, 1-9. doi:10.1017/S0033291720000847	Observational study	UK, Holland, Spain, France, Italy, Brazil	31.4	Cannabis-associated psychosis-like symptoms	CEQ	Use of hallucinogens	0.036 (-0.076; 0.149)	0.5288	1213
	Sami et al. (2020)	Sami, M., Quattrone, D., Ferraro, L., Tripoli, G., Cascia, E., Gayer-Anderson, C., . . . Forti, M. (2020). Association of extent of cannabis use and psychotic like intoxication experiences in a multi-national sample of first episode psychosis patients and controls. Psychological Medicine, 1-9. doi:10.1017/S0033291720000847	Observational study	UK, Holland, Spain, France, Italy, Brazil	31.4	Cannabis-associated psychosis-like symptoms	CEQ	Use of ketamine	-0.059 (-0.172; 0.053)	0.3033	1213
	Sami et al. (2020)	Sami, M., Quattrone, D., Ferraro, L., Tripoli, G., Cascia, E., Gayer-Anderson, C., . . . Forti, M. (2020). Association of extent of cannabis use and psychotic like intoxication experiences in a multi-national sample of first episode psychosis patients and controls. Psychological Medicine, 1-9. doi:10.1017/S0033291720000847	Observational study	UK, Holland, Spain, France, Italy, Brazil	31.4	Cannabis-associated psychosis-like symptoms	CEQ	Use of ketamine	-0.007 (-0.12; 0.105)	0.8966	1213
	Sami et al. (2020)	Sami, M., Quattrone, D., Ferraro, L., Tripoli, G., Cascia, E., Gayer-Anderson, C., . . . Forti, M. (2020). Association of extent of cannabis use and psychotic like intoxication experiences in a multi-national sample of first episode psychosis patients and controls. Psychological Medicine, 1-9. doi:10.1017/S0033291720000847	Observational study	UK, Holland, Spain, France, Italy, Brazil	31.4	Cannabis-associated psychosis-like symptoms	CEQ	Use of new psychoactive substances	-0.006 (-0.118; 0.107)	0.9204	1213
	Sami et al. (2020)	Sami, M., Quattrone, D., Ferraro, L., Tripoli, G., Cascia, E., Gayer-Anderson, C., . . . Forti, M. (2020). Association of extent of cannabis use and psychotic like intoxication experiences in a multi-national sample of first episode psychosis patients and controls. Psychological Medicine, 1-9. doi:10.1017/S0033291720000847	Observational study	UK, Holland, Spain, France, Italy, Brazil	31.4	Cannabis-associated psychosis-like symptoms	CEQ	Use of new psychoactive substances	0.067 (-0.046; 0.179)	0.2464	1213
	Bhattacharyya et al. (2012)	Bhattacharyya, S., Atakan, Z., Martin-Santos, R., Crippa, J.A., Kambeitz, J., Prata, D., Williams, S., Brammer, M., Collier, D.A. and McGuire, P.K., 2012. Preliminary report of biological basis of sensitivity to the effects of cannabis on psychosis: AKT1 and DAT1 genotype modulates the effects of δ-9-tetrahydrocannabinol on midbrain and striatal function. Molecular psychiatry, 17(12), pp.1152-115…	Experiment	UK	25.97	Cannabis-associated psychosis-like symptoms	PANSS (total)	AKT1	-0.627 (-1.309; 0.054)	0.08009	35
	Bhattacharyya et al. (2012)	Bhattacharyya, S., Atakan, Z., Martin-Santos, R., Crippa, J.A., Kambeitz, J., Prata, D., Williams, S., Brammer, M., Collier, D.A. and McGuire, P.K., 2012. Preliminary report of biological basis of sensitivity to the effects of cannabis on psychosis: AKT1 and DAT1 genotype modulates the effects of δ-9-tetrahydrocannabinol on midbrain and striatal function. Molecular psychiatry, 17(12), pp.1152-115…	Experiment	UK	25.97	Cannabis-associated psychosis-like symptoms	PANSS (total)	DAT1	0.924 (0.226; 1.621)	0.01396	35
	Atakan et al. (2013)	Atakan, Z., S. Bhattacharyya, P. Allen, R. Martin-Santos, J. A. Crippa, 2SJ Borgwardt, P. Fusar-Poli et al. "Cannabis affects people differently: inter-subject variation in the psychotogenic effects of Δ9-tetrahydrocannabinol: a functional magnetic resonance imaging study with healthy volunteers." Psychological medicine 43, no. 6 (2013): 1255-1267.	Experiment	UK	26.2	Cannabis-associated psychosis-like symptoms	PANSS (positive)	EmploymentStatus	-0.903 (-2.209; 0.404)	0.2055	12
	Atakan et al. (2013)	Atakan, Z., S. Bhattacharyya, P. Allen, R. Martin-Santos, J. A. Crippa, 2SJ Borgwardt, P. Fusar-Poli et al. "Cannabis affects people differently: inter-subject variation in the psychotogenic effects of Δ9-tetrahydrocannabinol: a functional magnetic resonance imaging study with healthy volunteers." Psychological medicine 43, no. 6 (2013): 1255-1267.	Experiment	UK	26.2	Cannabis-associated psychosis-like symptoms	PANSS (positive)	Anxiety liability	-0.135 (-0.993; 0.722)	0.7603	21
	Atakan et al. (2013)	Atakan, Z., S. Bhattacharyya, P. Allen, R. Martin-Santos, J. A. Crippa, 2SJ Borgwardt, P. Fusar-Poli et al. "Cannabis affects people differently: inter-subject variation in the psychotogenic effects of Δ9-tetrahydrocannabinol: a functional magnetic resonance imaging study with healthy volunteers." Psychological medicine 43, no. 6 (2013): 1255-1267.	Experiment	UK	26.2	Cannabis-associated psychosis-like symptoms	PANSS (positive)	Subjective high	0.673 (-0.207; 1.553)	0.1504	21
	Atakan et al. (2013)	Atakan, Z., S. Bhattacharyya, P. Allen, R. Martin-Santos, J. A. Crippa, 2SJ Borgwardt, P. Fusar-Poli et al. "Cannabis affects people differently: inter-subject variation in the psychotogenic effects of Δ9-tetrahydrocannabinol: a functional magnetic resonance imaging study with healthy volunteers." Psychological medicine 43, no. 6 (2013): 1255-1267.	Experiment	UK	26.2	Cannabis-associated psychosis-like symptoms	PANSS (positive)	Subjective high	0.352 (-0.511; 1.215)	0.4335	21
	Atakan et al. (2013)	Atakan, Z., S. Bhattacharyya, P. Allen, R. Martin-Santos, J. A. Crippa, 2SJ Borgwardt, P. Fusar-Poli et al. "Cannabis affects people differently: inter-subject variation in the psychotogenic effects of Δ9-tetrahydrocannabinol: a functional magnetic resonance imaging study with healthy volunteers." Psychological medicine 43, no. 6 (2013): 1255-1267.	Experiment	UK	26.2	Cannabis-associated psychosis-like symptoms	PANSS (positive)	Other (VAMS tranquillization subscale)	-0.183 (-1.041; 0.675)	0.6806	21
	Atakan et al. (2013)	Atakan, Z., S. Bhattacharyya, P. Allen, R. Martin-Santos, J. A. Crippa, 2SJ Borgwardt, P. Fusar-Poli et al. "Cannabis affects people differently: inter-subject variation in the psychotogenic effects of Δ9-tetrahydrocannabinol: a functional magnetic resonance imaging study with healthy volunteers." Psychological medicine 43, no. 6 (2013): 1255-1267.	Experiment	UK	26.2	Cannabis-associated psychosis-like symptoms	PANSS (positive)	Psychosis liability	-0.673 (-1.553; 0.207)	0.1504	21
	Atakan et al. (2013)	Atakan, Z., S. Bhattacharyya, P. Allen, R. Martin-Santos, J. A. Crippa, 2SJ Borgwardt, P. Fusar-Poli et al. "Cannabis affects people differently: inter-subject variation in the psychotogenic effects of Δ9-tetrahydrocannabinol: a functional magnetic resonance imaging study with healthy volunteers." Psychological medicine 43, no. 6 (2013): 1255-1267.	Experiment	UK	26.2	Cannabis-associated psychosis-like symptoms	PANSS (positive)	Other (PANSS negative score prior THC administration)	-0.393 (-1.257; 0.472)	0.3844	21
	Atakan et al. (2013)	Atakan, Z., S. Bhattacharyya, P. Allen, R. Martin-Santos, J. A. Crippa, 2SJ Borgwardt, P. Fusar-Poli et al. "Cannabis affects people differently: inter-subject variation in the psychotogenic effects of Δ9-tetrahydrocannabinol: a functional magnetic resonance imaging study with healthy volunteers." Psychological medicine 43, no. 6 (2013): 1255-1267.	Experiment	UK	26.2	Cannabis-associated psychosis-like symptoms	PANSS (positive)	Other (PANSS general symptom score prior THC administration)	-0.183 (-1.041; 0.675)	0.6806	21
	Atakan et al. (2013)	Atakan, Z., S. Bhattacharyya, P. Allen, R. Martin-Santos, J. A. Crippa, 2SJ Borgwardt, P. Fusar-Poli et al. "Cannabis affects people differently: inter-subject variation in the psychotogenic effects of Δ9-tetrahydrocannabinol: a functional magnetic resonance imaging study with healthy volunteers." Psychological medicine 43, no. 6 (2013): 1255-1267.	Experiment	UK	26.2	Cannabis-associated psychosis-like symptoms	PANSS (positive)	Other (PANSS total score prior THC administration)	-0.446 (-1.313; 0.421)	0.3258	21
	Atakan et al. (2013)	Atakan, Z., S. Bhattacharyya, P. Allen, R. Martin-Santos, J. A. Crippa, 2SJ Borgwardt, P. Fusar-Poli et al. "Cannabis affects people differently: inter-subject variation in the psychotogenic effects of Δ9-tetrahydrocannabinol: a functional magnetic resonance imaging study with healthy volunteers." Psychological medicine 43, no. 6 (2013): 1255-1267.	Experiment	UK	26.2	Cannabis-associated psychosis-like symptoms	PANSS (positive)	Other (Reaction time to Go signals (Go/No-Go task))	-0.166 (-1.024; 0.692)	0.709	21
	Atakan et al. (2013)	Atakan, Z., S. Bhattacharyya, P. Allen, R. Martin-Santos, J. A. Crippa, 2SJ Borgwardt, P. Fusar-Poli et al. "Cannabis affects people differently: inter-subject variation in the psychotogenic effects of Δ9-tetrahydrocannabinol: a functional magnetic resonance imaging study with healthy volunteers." Psychological medicine 43, no. 6 (2013): 1255-1267.	Experiment	UK	26.2	Cannabis-associated psychosis-like symptoms	PANSS (positive)	Other (Reaction time to Oddball signals (Go/No-Go task))	-0.529 (-1.4; 0.343)	0.2489	21
	Atakan et al. (2013)	Atakan, Z., S. Bhattacharyya, P. Allen, R. Martin-Santos, J. A. Crippa, 2SJ Borgwardt, P. Fusar-Poli et al. "Cannabis affects people differently: inter-subject variation in the psychotogenic effects of Δ9-tetrahydrocannabinol: a functional magnetic resonance imaging study with healthy volunteers." Psychological medicine 43, no. 6 (2013): 1255-1267.	Experiment	UK	26.2	Cannabis-associated psychosis-like symptoms	PANSS (positive)	Other (Inhibition error (Go/No-Go task))	-0.221 (-1.08; 0.638)	0.6204	21
	Atakan et al. (2013)	Atakan, Z., S. Bhattacharyya, P. Allen, R. Martin-Santos, J. A. Crippa, 2SJ Borgwardt, P. Fusar-Poli et al. "Cannabis affects people differently: inter-subject variation in the psychotogenic effects of Δ9-tetrahydrocannabinol: a functional magnetic resonance imaging study with healthy volunteers." Psychological medicine 43, no. 6 (2013): 1255-1267.	Experiment	UK	26.2	Cannabis-associated psychosis-like symptoms	PANSS (positive)	Other (Heart rate prior THC administration)	0 (-0.856; 0.856)	1	21
	Atakan et al. (2013)	Atakan, Z., S. Bhattacharyya, P. Allen, R. Martin-Santos, J. A. Crippa, 2SJ Borgwardt, P. Fusar-Poli et al. "Cannabis affects people differently: inter-subject variation in the psychotogenic effects of Δ9-tetrahydrocannabinol: a functional magnetic resonance imaging study with healthy volunteers." Psychological medicine 43, no. 6 (2013): 1255-1267.	Experiment	UK	26.2	Cannabis-associated psychosis-like symptoms	PANSS (positive)	Other (Attenuated activation in right middle temporal gyrus)	1.768 (0.758; 2.777)	0.002795	21
	Atakan et al. (2013)	Atakan, Z., S. Bhattacharyya, P. Allen, R. Martin-Santos, J. A. Crippa, 2SJ Borgwardt, P. Fusar-Poli et al. "Cannabis affects people differently: inter-subject variation in the psychotogenic effects of Δ9-tetrahydrocannabinol: a functional magnetic resonance imaging study with healthy volunteers." Psychological medicine 43, no. 6 (2013): 1255-1267.	Experiment	UK	26.2	Cannabis-associated psychosis-like symptoms	PANSS (positive)	Other (Attenuated activation in the cerebellum)	1.391 (0.437; 2.345)	0.01009	21
	Bloomfield et al. (2014)	Bloomfield, Michael AP, Celia JA Morgan, Alice Egerton, Shitij Kapur, H. Valerie Curran, and Oliver D. Howes. "Dopaminergic function in cannabis users and its relationship to cannabis-induced psychotic symptoms." Biological psychiatry 75, no. 6 (2014): 470-478.	Experiment	UK	21.55	Cannabis-associated psychosis-like symptoms	PSI (total)	Dopaminergic function	0.676 (-0.3; 1.651)	0.1914	19
	Radhakrishnan et al. (2015)	Radhakrishnan, Rajiv, Patrick D. Skosnik, Jose Cortes-Briones, R. Andrew Sewell, Michelle Carbuto, Ashley Schnakenberg, John Cahill et al. "GABA deficits enhance the psychotomimetic effects of Δ 9-THC." Neuropsychopharmacology 40, no. 8 (2015): 2047-2056.	Experiment	US	25.44	Cannabis-associated psychosis-like symptoms	PANSS (total)	GABAergic function	-0.6 (-1.065; -0.136)	0.01132	21
	Radhakrishnan et al. (2015)	Radhakrishnan, Rajiv, Patrick D. Skosnik, Jose Cortes-Briones, R. Andrew Sewell, Michelle Carbuto, Ashley Schnakenberg, John Cahill et al. "GABA deficits enhance the psychotomimetic effects of Δ 9-THC." Neuropsychopharmacology 40, no. 8 (2015): 2047-2056.	Experiment	US	25.44	Cannabis-associated psychosis-like symptoms	PANSS (positive)	Other (ERP)	0.658 (-0.407; 1.724)	0.2448	16
	Radhakrishnan et al. (2015)	Radhakrishnan, Rajiv, Patrick D. Skosnik, Jose Cortes-Briones, R. Andrew Sewell, Michelle Carbuto, Ashley Schnakenberg, John Cahill et al. "GABA deficits enhance the psychotomimetic effects of Δ 9-THC." Neuropsychopharmacology 40, no. 8 (2015): 2047-2056.	Experiment	US	25.44	Cannabis-associated psychosis-like symptoms	PANSS (positive)	Other (ERP)	0.373 (-0.657; 1.403)	0.4885	16
	Morrison et al. (2009)	Morrison, P. D., V. Zois, D. A. McKeown, T. D. Lee, D. W. Holt, J. F. Powell, S. Kapur, and R. M. Murray. "The acute effects of synthetic intravenous Δ 9-tetrahydrocannabinol on psychosis, mood and cognitive functioning." Psychological medicine 39, no. 10 (2009): 1607-1616.	Experiment	UK	28	Cannabis-associated psychosis-like symptoms	PANSS (positive symptoms)	Single dose THC (versus placebo)	0.669 (0.196; 1.142)	0.005571	21
	Morrison et al. (2009)	Morrison, P. D., V. Zois, D. A. McKeown, T. D. Lee, D. W. Holt, J. F. Powell, S. Kapur, and R. M. Murray. "The acute effects of synthetic intravenous Δ 9-tetrahydrocannabinol on psychosis, mood and cognitive functioning." Psychological medicine 39, no. 10 (2009): 1607-1616.	Experiment	UK	28	Cannabis-associated psychosis-like symptoms	CAPE (positive symptoms)	Single dose THC (versus placebo)	0.917 (0.35; 1.483)	0.001517	17
	Liem-Moolenaar et al. (2010)	Liem-Moolenaar, Marieke, Erik T. te Beek, Marieke L. de Kam, Kari L. Franson, René S. Kahn, Ron Hijman, Daan Touw, and J. MA van Gerven. "Central nervous system effects of haloperidol on THC in healthy male volunteers." Journal of psychopharmacology 24, no. 11 (2010): 1697-1708.	Experiment	Netherlands		Cannabis-associated psychosis-like symptoms	PANSS (positive)	Single dose THC (versus placebo)	1.114 (0.362; 1.867)	0.003694	11
	Liem-Moolenaar et al. (2010)	Liem-Moolenaar, Marieke, Erik T. te Beek, Marieke L. de Kam, Kari L. Franson, René S. Kahn, Ron Hijman, Daan Touw, and J. MA van Gerven. "Central nervous system effects of haloperidol on THC in healthy male volunteers." Journal of psychopharmacology 24, no. 11 (2010): 1697-1708.	Experiment	Netherlands		Cannabis-associated psychosis-like symptoms	PANSS (positive)	Single dose THC (versus placebo)	1.427 (0.588; 2.267)	0.0008627	11
	Liem-Moolenaar et al. (2010)	Liem-Moolenaar, Marieke, Erik T. te Beek, Marieke L. de Kam, Kari L. Franson, René S. Kahn, Ron Hijman, Daan Touw, and J. MA van Gerven. "Central nervous system effects of haloperidol on THC in healthy male volunteers." Journal of psychopharmacology 24, no. 11 (2010): 1697-1708.	Experiment	Netherlands		Cannabis-associated psychosis-like symptoms	PANSS (positive)	Single dose THC (versus placebo)	1.342 (0.527; 2.157)	0.001244	11
	Liem-Moolenaar et al. (2010)	Liem-Moolenaar, Marieke, Erik T. te Beek, Marieke L. de Kam, Kari L. Franson, René S. Kahn, Ron Hijman, Daan Touw, and J. MA van Gerven. "Central nervous system effects of haloperidol on THC in healthy male volunteers." Journal of psychopharmacology 24, no. 11 (2010): 1697-1708.	Experiment	Netherlands		Cannabis-associated psychosis-like symptoms	PANSS (positive)	Dopaminergic function	0.792 (0.083; 1.501)	0.03614	33
	Stokes et al. (2009)	Stokes, Paul RA, Mitul A. Mehta, H. Valerie Curran, Gerome Breen, and Paul M. Grasby. "Can recreational doses of THC produce significant dopamine release in the human striatum?." Neuroimage 48, no. 1 (2009): 186-190.	Experiment	UK	33	Cannabis-associated psychosis-like symptoms	PSI (total)	Single dose THC (versus placebo)	1.558 (0.749; 2.366)	0.00016	13
	Stokes et al. (2009)	Stokes, Paul RA, Mitul A. Mehta, H. Valerie Curran, Gerome Breen, and Paul M. Grasby. "Can recreational doses of THC produce significant dopamine release in the human striatum?." Neuroimage 48, no. 1 (2009): 186-190.	Experiment	UK	33	Cannabis-associated delusions	PSI (delusion subscale)	Single dose THC (versus placebo)	0.143 (-0.404; 0.689)	0.6083	13
	Stokes et al. (2009)	Stokes, Paul RA, Mitul A. Mehta, H. Valerie Curran, Gerome Breen, and Paul M. Grasby. "Can recreational doses of THC produce significant dopamine release in the human striatum?." Neuroimage 48, no. 1 (2009): 186-190.	Experiment	UK	33	Cannabis-associated paranoia	PSI (paranoia subscale)	Single dose THC (versus placebo)	0.627 (0.032; 1.221)	0.03887	13
	Stokes et al. (2009)	Stokes, Paul RA, Mitul A. Mehta, H. Valerie Curran, Gerome Breen, and Paul M. Grasby. "Can recreational doses of THC produce significant dopamine release in the human striatum?." Neuroimage 48, no. 1 (2009): 186-190.	Experiment	UK	33	Cannabis-associated psychosis-like symptoms	PSI (total)	THC placma level	0 (-0.628; 0.628)	1	39
	Stokes et al. (2009)	Stokes, Paul RA, Mitul A. Mehta, H. Valerie Curran, Gerome Breen, and Paul M. Grasby. "Can recreational doses of THC produce significant dopamine release in the human striatum?." Neuroimage 48, no. 1 (2009): 186-190.	Experiment	UK	33	Cannabis-associated delusions	PSI (delusion subscale)	THC placma level	0 (-0.628; 0.628)	1	39
	Stokes et al. (2009)	Stokes, Paul RA, Mitul A. Mehta, H. Valerie Curran, Gerome Breen, and Paul M. Grasby. "Can recreational doses of THC produce significant dopamine release in the human striatum?." Neuroimage 48, no. 1 (2009): 186-190.	Experiment	UK	33	Cannabis-associated paranoia	PSI (paranoia subscale)	THC placma level	0 (-0.628; 0.628)	1	39
	D'Souza et al. (2008)	D’Souza, Deepak Cyril, Gabriel Braley, Rebecca Blaise, Michael Vendetti, Stephen Oliver, Brian Pittman, Mohini Ranganathan et al. "Effects of haloperidol on the behavioral, subjective, cognitive, motor, and neuroendocrine effects of Δ-9-tetrahydrocannabinol in humans." Psychopharmacology 198, no. 4 (2008): 587-603.	Experiment	US	24.89	Cannabis-associated psychosis-like symptoms	PANSS (positive)	Single dose THC (versus placebo)	1.186 (0.614; 1.758)	4.815e-05	20
	D'Souza et al. (2008)	D’Souza, Deepak Cyril, Gabriel Braley, Rebecca Blaise, Michael Vendetti, Stephen Oliver, Brian Pittman, Mohini Ranganathan et al. "Effects of haloperidol on the behavioral, subjective, cognitive, motor, and neuroendocrine effects of Δ-9-tetrahydrocannabinol in humans." Psychopharmacology 198, no. 4 (2008): 587-603.	Experiment	US	24.89	Cannabis-associated psychosis-like symptoms	PANSS (positive)	Dopaminergic function	0.365 (-0.088; 0.818)	0.1141	20
	Freeman et al. (2015)	Freeman, D., Dunn, G., Murray, R.M., Evans, N., Lister, R., Antley, A., Slater, M., Godlewska, B., Cornish, R., Williams, J. and Di Simplicio, M., 2015. How cannabis causes paranoia: using the intravenous administration of∆ 9-tetrahydrocannabinol (THC) to identify key cognitive mechanisms leading to paranoia. Schizophrenia bulletin, 41(2), pp.391-399.	Experiment	UK	30	Cannabis-associated paranoia	Paranoid VAS, Hostile VAS, SSPS, PANSS suscpiciousness	Single dose THC (versus placebo)	0.475 (0.036; 0.914)	0.03708	82
	Freeman et al. (2015)	Freeman, D., Dunn, G., Murray, R.M., Evans, N., Lister, R., Antley, A., Slater, M., Godlewska, B., Cornish, R., Williams, J. and Di Simplicio, M., 2015. How cannabis causes paranoia: using the intravenous administration of∆ 9-tetrahydrocannabinol (THC) to identify key cognitive mechanisms leading to paranoia. Schizophrenia bulletin, 41(2), pp.391-399.	Experiment	UK	30	Cannabis-associated paranoia	Paranoid VAS, Hostile VAS, SSPS, PANSS suscpiciousness	Other (Awareness training)	0.259 (-0.181; 0.7)	0.2516	80
	Tunbridge et al. (2015)	Tunbridge, Elizabeth M., Graham Dunn, Robin M. Murray, Nicole Evans, Rachel Lister, Katharina Stumpenhorst, Paul J. Harrison, Paul D. Morrison, and Daniel Freeman. "Genetic moderation of the effects of cannabis: catechol-O-methyltransferase (COMT) affects the impact of Δ9-tetrahydrocannabinol (THC) on working memory performance but not on the occurrence of psychotic experiences." Journal of psych…	Experiment	UK	32	Cannabis-associated psychosis-like symptoms	CAPE (positive dimension)	COMT	-0.179 (-0.624; 0.265)	0.432	78
	Peters et al. (2009)	Peters, Bart D., Pelle de Koning, Peter Dingemans, Hiske Becker, Don H. Linszen, and Lieuwe de Haan. "Subjective effects of cannabis before the first psychotic episode." Australian and New Zealand Journal of Psychiatry 43, no. 12 (2009): 1155-1162.	Observational study	Netherlands	22.8	Cannabis-associated hallucinations	Single item (what did you notice after using cannabis (unusual visual experiences))	Psychosis liability	0.872 (0.22; 1.525)	0.008785	104
	Peters et al. (2009)	Peters, Bart D., Pelle de Koning, Peter Dingemans, Hiske Becker, Don H. Linszen, and Lieuwe de Haan. "Subjective effects of cannabis before the first psychotic episode." Australian and New Zealand Journal of Psychiatry 43, no. 12 (2009): 1155-1162.	Observational study	Netherlands	22.8	Cannabis-associated hallucinations	Single item (what did you notice after using cannabis (unusual visual experiences))	Psychosis liability	0.72 (-0.115; 1.556)	0.09112	69
	Peters et al. (2009)	Peters, Bart D., Pelle de Koning, Peter Dingemans, Hiske Becker, Don H. Linszen, and Lieuwe de Haan. "Subjective effects of cannabis before the first psychotic episode." Australian and New Zealand Journal of Psychiatry 43, no. 12 (2009): 1155-1162.	Observational study	Netherlands	22.8	Cannabis-associated hallucinations	Single item (what did you notice after using cannabis (unusual visual experiences))	Psychosis liability	0.278 (-0.212; 0.768)	0.2656	104
	Peters et al. (2009)	Peters, Bart D., Pelle de Koning, Peter Dingemans, Hiske Becker, Don H. Linszen, and Lieuwe de Haan. "Subjective effects of cannabis before the first psychotic episode." Australian and New Zealand Journal of Psychiatry 43, no. 12 (2009): 1155-1162.	Observational study	Netherlands	22.8	Cannabis-associated hallucinations	Single item (what did you notice after using cannabis (unusual visual experiences))	Psychosis liability	0.076 (-0.643; 0.794)	0.8368	69
	Peters et al. (2009)	Peters, Bart D., Pelle de Koning, Peter Dingemans, Hiske Becker, Don H. Linszen, and Lieuwe de Haan. "Subjective effects of cannabis before the first psychotic episode." Australian and New Zealand Journal of Psychiatry 43, no. 12 (2009): 1155-1162.	Observational study	Netherlands	22.8	Cannabis-associated hallucinations	Single item (what did you notice after using cannabis (unusual visual experiences))	Psychosis liability	1.617 (0.475; 2.759)	0.00552	104
	Peters et al. (2009)	Peters, Bart D., Pelle de Koning, Peter Dingemans, Hiske Becker, Don H. Linszen, and Lieuwe de Haan. "Subjective effects of cannabis before the first psychotic episode." Australian and New Zealand Journal of Psychiatry 43, no. 12 (2009): 1155-1162.	Observational study	Netherlands	22.8	Cannabis-associated hallucinations	Single item (what did you notice after using cannabis (unusual visual experiences))	Psychosis liability	1.318 (0.029; 2.608)	0.0451	69
	Peters et al. (2009)	Peters, Bart D., Pelle de Koning, Peter Dingemans, Hiske Becker, Don H. Linszen, and Lieuwe de Haan. "Subjective effects of cannabis before the first psychotic episode." Australian and New Zealand Journal of Psychiatry 43, no. 12 (2009): 1155-1162.	Observational study	Netherlands	22.8	Cannabis-associated paranoia	Single item (what did you notice after using cannabis (suspicion))	Psychosis liability	1.582 (0.873; 2.292)	1.225e-05	104
	Peters et al. (2009)	Peters, Bart D., Pelle de Koning, Peter Dingemans, Hiske Becker, Don H. Linszen, and Lieuwe de Haan. "Subjective effects of cannabis before the first psychotic episode." Australian and New Zealand Journal of Psychiatry 43, no. 12 (2009): 1155-1162.	Observational study	Netherlands	22.8	Cannabis-associated paranoia	Single item (what did you notice after using cannabis (suspicion))	Psychosis liability	1.343 (0.509; 2.178)	0.001608	69
	D'Souza et al. (2008)	D'souza, Deepak Cyril, Mohini Ranganathan, Gabriel Braley, Ralitza Gueorguieva, Zoran Zimolo, Thomas Cooper, Edward Perry, and John Krystal. "Blunted psychotomimetic and amnestic effects of Δ-9-tetrahydrocannabinol in frequent users of cannabis." Neuropsychopharmacology 33, no. 10 (2008): 2505-2516.	Experiment	US	24.8	Cannabis-associated psychosis-like symptoms	PANSS (total)	Other (Single dose IV (2.5mg THC) [in individuals with CUD])	0.74 (0.336; 1.143)	0.0003308	30
	D'Souza et al. (2008)	D'souza, Deepak Cyril, Mohini Ranganathan, Gabriel Braley, Ralitza Gueorguieva, Zoran Zimolo, Thomas Cooper, Edward Perry, and John Krystal. "Blunted psychotomimetic and amnestic effects of Δ-9-tetrahydrocannabinol in frequent users of cannabis." Neuropsychopharmacology 33, no. 10 (2008): 2505-2516.	Experiment	US	29	Cannabis-associated psychosis-like symptoms	PANSS (total)	Single dose THC (versus placebo)	0.826 (0.342; 1.31)	0.0008239	22
	D'Souza et al. (2008)	D'souza, Deepak Cyril, Mohini Ranganathan, Gabriel Braley, Ralitza Gueorguieva, Zoran Zimolo, Thomas Cooper, Edward Perry, and John Krystal. "Blunted psychotomimetic and amnestic effects of Δ-9-tetrahydrocannabinol in frequent users of cannabis." Neuropsychopharmacology 33, no. 10 (2008): 2505-2516.	Experiment	US	24.8	Cannabis-associated psychosis-like symptoms	PANSS (total)	Other (Single dose IV (5mg THC) [in individuals with CUD])	1.055 (0.608; 1.501)	3.641e-06	30
	D'Souza et al. (2008)	D'souza, Deepak Cyril, Mohini Ranganathan, Gabriel Braley, Ralitza Gueorguieva, Zoran Zimolo, Thomas Cooper, Edward Perry, and John Krystal. "Blunted psychotomimetic and amnestic effects of Δ-9-tetrahydrocannabinol in frequent users of cannabis." Neuropsychopharmacology 33, no. 10 (2008): 2505-2516.	Experiment	US	29	Cannabis-associated psychosis-like symptoms	PANSS (total)	Single dose THC (versus placebo)	0.951 (0.448; 1.455)	0.0002141	22
	Green et al. (2004)	Green, Bob, David Kavanagh, and Ross MCD Young. "Reasons for cannabis use in men with and without psychosis." Drug and alcohol review 23, no. 4 (2004): 445-453.	Observational study	Australia	30	Cannabis-associated psychosis-like symptoms	Single item (the last time you smoked cannabis, did you experience psychotic symptoms?)	Psychosis liability	0.41 (0.018; 0.802)	0.05	92
	Green et al. (2004)	Green, Bob, David Kavanagh, and Ross MCD Young. "Reasons for cannabis use in men with and without psychosis." Drug and alcohol review 23, no. 4 (2004): 445-453.	Observational study	Australia	30	Cannabis-associated paranoia	Single item (the last time you smoked cannabis, did you experience paranoia?)	Psychosis liability	0.687 (0.009; 1.365)	0.04694	92
	Englund et al. (2013)	Englund, Amir, Paul D. Morrison, Judith Nottage, Dominic Hague, Fergus Kane, Stefania Bonaccorso, James M. Stone et al. "Cannabidiol inhibits THC-elicited paranoid symptoms and hippocampal-dependent memory impairment." Journal of psychopharmacology 27, no. 1 (2013): 19-27.	Experiment	UK	26	Cannabis-associated psychosis-like symptoms	PANSS (positive)	Single dose THC (versus placebo)	0.774 (0.336; 1.212)	0.0005348	26
	Englund et al. (2013)	Englund, Amir, Paul D. Morrison, Judith Nottage, Dominic Hague, Fergus Kane, Stefania Bonaccorso, James M. Stone et al. "Cannabidiol inhibits THC-elicited paranoid symptoms and hippocampal-dependent memory impairment." Journal of psychopharmacology 27, no. 1 (2013): 19-27.	Experiment	UK	26	Cannabis-associated psychosis-like symptoms	PANSS (positive)	CBD (administration)	-0.464 (-1.039; 0.112)	0.1211	48
	Englund et al. (2013)	Englund, Amir, Paul D. Morrison, Judith Nottage, Dominic Hague, Fergus Kane, Stefania Bonaccorso, James M. Stone et al. "Cannabidiol inhibits THC-elicited paranoid symptoms and hippocampal-dependent memory impairment." Journal of psychopharmacology 27, no. 1 (2013): 19-27.	Experiment	UK	26	Cannabis-associated psychosis-like symptoms	PANSS (positive, Acute psychotic reaction)	CBD (administration)	-0.655 (-1.257; -0.053)	0.0384	48
	Englund et al. (2013)	Englund, Amir, Paul D. Morrison, Judith Nottage, Dominic Hague, Fergus Kane, Stefania Bonaccorso, James M. Stone et al. "Cannabidiol inhibits THC-elicited paranoid symptoms and hippocampal-dependent memory impairment." Journal of psychopharmacology 27, no. 1 (2013): 19-27.	Experiment	UK	26	Cannabis-associated paranoia	SSPS	CBD (administration)	-0.66 (-1.243; -0.078)	0.03134	48
	Morgan et al. (2010)	Morgan, Celia JA, Grainne Schafer, Tom P. Freeman, and H. Valerie Curran. "Impact of cannabidiol on the acute memory and psychotomimetic effects of smoked cannabis: naturalistic study." The British Journal of Psychiatry 197, no. 4 (2010): 285-290.	Experiment	UK	21.47	Cannabis-associated psychosis-like symptoms	PSI (total)	Cannabis strain (high in CBD)	-0.406 (-1.072; 0.261)	0.2327	44
	Kleinloog et al. (2012)	Kleinloog, Daniël, Marieke Liem-Moolenaar, Gabriël Jacobs, Erica Klaassen, Marieke de Kam, Ron Hijman, and Joop van Gerven. "Does olanzapine inhibit the psychomimetic effects of Δ9-tetrahydrocannabinol?." Journal of Psychopharmacology 26, no. 10 (2012): 1307-1316.	Experiment	Netherlands		Cannabis-associated psychosis-like symptoms	PANSS (positive)	Dopaminergic function	0.306 (-0.02; 0.631)	0.06756	147
	Kleinloog et al. (2012)	Kleinloog, Daniël, Marieke Liem-Moolenaar, Gabriël Jacobs, Erica Klaassen, Marieke de Kam, Ron Hijman, and Joop van Gerven. "Does olanzapine inhibit the psychomimetic effects of Δ9-tetrahydrocannabinol?." Journal of Psychopharmacology 26, no. 10 (2012): 1307-1316.	Experiment	Netherlands		Cannabis-associated psychosis-like symptoms	PANSS (positive)	Single dose THC (versus placebo)	0.559 (0.23; 0.889)	0.001117	147
	Collin et al. (2010)	Collin, C., E. Ehler, G. Waberzinek, Z. Alsindi, P. Davies, K. Powell, W. Notcutt et al. "A double-blind, randomized, placebo-controlled, parallel-group study of Sativex, in subjects with symptoms of spasticity due to multiple sclerosis." Neurological research 32, no. 5 (2010): 451-459.	Medicinal cannabis study	UK	48	Cannabis-associated hallucinations	Single item (reported adverse drug effect (hallucinations))	Medicinal cannabis (placebo controlled)	0.395 (-0.933; 1.724)	0.5598	337
	Collin et al. (2010)	Collin, C., E. Ehler, G. Waberzinek, Z. Alsindi, P. Davies, K. Powell, W. Notcutt et al. "A double-blind, randomized, placebo-controlled, parallel-group study of Sativex, in subjects with symptoms of spasticity due to multiple sclerosis." Neurological research 32, no. 5 (2010): 451-459.	Medicinal cannabis study	UK	48	Cannabis-associated paranoia	Single item (reported adverse drug effect (paranoia))	Medicinal cannabis (placebo controlled)	0.01 (-1.523; 1.543)	0.9899	337
	Aragona et al. (2009)	Aragona, Massimiliano, Emanuela Onesti, Valentina Tomassini, Antonella Conte, Shiva Gupta, Francesca Gilio, Patrizia Pantano, Carlo Pozzilli, and Maurizio Inghilleri. "Psychopathological and cognitive effects of therapeutic cannabinoids in multiple sclerosis: a double-blind, placebo controlled, crossover study." Clinical neuropharmacology 32, no. 1 (2009): 41-47.	Medicinal cannabis study	Italy	49.8	Cannabis-associated paranoia	SCL-90-R	Medicinal cannabis (placebo controlled)	0.08 (-0.396; 0.557)	0.7408	17
	Aragona et al. (2009)	Aragona, Massimiliano, Emanuela Onesti, Valentina Tomassini, Antonella Conte, Shiva Gupta, Francesca Gilio, Patrizia Pantano, Carlo Pozzilli, and Maurizio Inghilleri. "Psychopathological and cognitive effects of therapeutic cannabinoids in multiple sclerosis: a double-blind, placebo controlled, crossover study." Clinical neuropharmacology 32, no. 1 (2009): 41-47.	Medicinal cannabis study	Italy	49.8	Cannabis-associated psychosis-like symptoms	SCL-90-R	Medicinal cannabis (placebo controlled)	-0.207 (-0.688; 0.273)	0.3982	17
	Duran et al. (2010)	Duran, Marta, Eulàlia Pérez, Sergio Abanades, Xavier Vidal, Cristina Saura, Margarita Majem, Edurne Arriola et al. "Preliminary efficacy and safety of an oromucosal standardized cannabis extract in chemotherapy‐induced nausea and vomiting." British journal of clinical pharmacology 70, no. 5 (2010): 656-663.	Medicinal cannabis study	Spain	50	Cannabis-associated hallucinations	Single item (reported adverse drug effect (psychosis))	Medicinal cannabis (placebo controlled)	0.593 (-0.466; 1.651)	0.2908	16
	Ranganathan et al. (2019)	Ranganathan, Mohini, Joao P. De Aquino, Jose A. Cortes-Briones, Rajiv Radhakrishnan, Brian Pittman, Savita Bhakta, and Deepak C. D’Souza. "Highs and lows of cannabinoid-dopamine interactions: effects of genetic variability and pharmacological modulation of catechol-O-methyl transferase on the acute response to delta-9-tetrahydrocannabinol in humans." Psychopharmacology 236, no. 11 (2019): 3209-32…	Experiment	US	25	Cannabis-associated psychosis-like symptoms	PANSS (positive)	Single dose THC (versus placebo)	0.536 (0.268; 0.803)	0.0001181	222
	Ranganathan et al. (2019)	Ranganathan, Mohini, Joao P. De Aquino, Jose A. Cortes-Briones, Rajiv Radhakrishnan, Brian Pittman, Savita Bhakta, and Deepak C. D’Souza. "Highs and lows of cannabinoid-dopamine interactions: effects of genetic variability and pharmacological modulation of catechol-O-methyl transferase on the acute response to delta-9-tetrahydrocannabinol in humans." Psychopharmacology 236, no. 11 (2019): 3209-32…	Experiment	US	25	Cannabis-associated psychosis-like symptoms	PANSS (positive)	COMT	0 (-0.263; 0.263)	1	222
	Ranganathan et al. (2019)	Ranganathan, Mohini, Joao P. De Aquino, Jose A. Cortes-Briones, Rajiv Radhakrishnan, Brian Pittman, Savita Bhakta, and Deepak C. D’Souza. "Highs and lows of cannabinoid-dopamine interactions: effects of genetic variability and pharmacological modulation of catechol-O-methyl transferase on the acute response to delta-9-tetrahydrocannabinol in humans." Psychopharmacology 236, no. 11 (2019): 3209-32…	Experiment	US	25	Cannabis-associated psychosis-like symptoms	PANSS (positive)	Other (Inhibition of COMT)	0 (-0.483; 0.483)	1	66
	Lichtman et al. (2018)	Lichtman, Aron H., Eberhard Albert Lux, Robert McQuade, Sandro Rossetti, Raymond Sanchez, Wei Sun, Stephen Wright, Elena Kornyeyeva, and Marie T. Fallon. "Results of a double-blind, randomized, placebo-controlled study of nabiximols oromucosal spray as an adjunctive therapy in advanced cancer patients with chronic uncontrolled pain." Journal of pain and symptom management 55, no. 2 (2018): 179-18…	Medicinal cannabis study	Worldwide	60	Cannabis-associated hallucinations	Study withdrawal due to hallucinations	Medicinal cannabis (placebo controlled)	0.1 (-0.097; 0.297)	0.3197	397
	Camera et al. (2012)	Camera, Ariella A., Veronica Tomaselli, Jerry Fleming, Gul A. Jabbar, Melissa Trachtenberg, Juan A. Galvez-Buccollini, Ashley C. Proal, Richard N. Rosenthal, and Lynn E. DeLisi. "Correlates to the variable effects of cannabis in young adults: a preliminary study." Harm reduction journal 9, no. 1 (2012): 15.	Observational study	US	22.9	Cannabis-associated hallucinations	Single item (experiences while under the influence of cannabis ( hallucinations))	Psychosis liability	0.078 (-0.316; 0.472)	0.6985	100
	Camera et al. (2012)	Camera, Ariella A., Veronica Tomaselli, Jerry Fleming, Gul A. Jabbar, Melissa Trachtenberg, Juan A. Galvez-Buccollini, Ashley C. Proal, Richard N. Rosenthal, and Lynn E. DeLisi. "Correlates to the variable effects of cannabis in young adults: a preliminary study." Harm reduction journal 9, no. 1 (2012): 15.	Observational study	US	22.9	Cannabis-associated psychosis-like symptoms	Multiple items	Age of onset (cannabis use)	-0.527 (-0.935; -0.12)	0.01273	100
	Camera et al. (2012)	Camera, Ariella A., Veronica Tomaselli, Jerry Fleming, Gul A. Jabbar, Melissa Trachtenberg, Juan A. Galvez-Buccollini, Ashley C. Proal, Richard N. Rosenthal, and Lynn E. DeLisi. "Correlates to the variable effects of cannabis in young adults: a preliminary study." Harm reduction journal 9, no. 1 (2012): 15.	Observational study	US	22.9	Cannabis-associated psychosis-like symptoms	Multiple items	Addiction liability	0.472 (0.047; 0.898)	0.03183	100
	Camera et al. (2012)	Camera, Ariella A., Veronica Tomaselli, Jerry Fleming, Gul A. Jabbar, Melissa Trachtenberg, Juan A. Galvez-Buccollini, Ashley C. Proal, Richard N. Rosenthal, and Lynn E. DeLisi. "Correlates to the variable effects of cannabis in young adults: a preliminary study." Harm reduction journal 9, no. 1 (2012): 15.	Observational study	US	22.9	Cannabis-associated hallucinations	Single item (experiences while under the influence of cannabis (hallucinations))	Use of alcohol	0.682 (0.265; 1.098)	0.001807	100
	Hindocha et al. (2020)	Hindocha, C., Quattrone, D., Freeman, T.P. et al. Do AKT1, COMT and FAAH influence reports of acute cannabis intoxication experiences in patients with first episode psychosis, controls and young adult cannabis users?. Transl Psychiatry 10, 143 (2020). https://doi.org/10.1038/s41398-020-0823-9	Observational study	UK	23.5	Cannabis-associated psychosis-like symptoms	CEQ	FAAH	-0.065 (-0.227; 0.096)	0.4268	590
	Hindocha et al. (2020)	Hindocha, C., Quattrone, D., Freeman, T.P. et al. Do AKT1, COMT and FAAH influence reports of acute cannabis intoxication experiences in patients with first episode psychosis, controls and young adult cannabis users?. Transl Psychiatry 10, 143 (2020). https://doi.org/10.1038/s41398-020-0823-9	Observational study	UK	23.5	Cannabis-associated psychosis-like symptoms	CEQ	Other (FAAH genotype (rs324420) x caseness (healhy vs psychosis))	-0.055 (-0.216; 0.107)	0.5072	590
	Hindocha et al. (2020)	Hindocha, C., Quattrone, D., Freeman, T.P. et al. Do AKT1, COMT and FAAH influence reports of acute cannabis intoxication experiences in patients with first episode psychosis, controls and young adult cannabis users?. Transl Psychiatry 10, 143 (2020). https://doi.org/10.1038/s41398-020-0823-9	Observational study	UK	23.5	Cannabis-associated psychosis-like symptoms	CEQ	COMT	-0.03 (-0.191; 0.131)	0.7119	592
	Hindocha et al. (2020)	Hindocha, C., Quattrone, D., Freeman, T.P. et al. Do AKT1, COMT and FAAH influence reports of acute cannabis intoxication experiences in patients with first episode psychosis, controls and young adult cannabis users?. Transl Psychiatry 10, 143 (2020). https://doi.org/10.1038/s41398-020-0823-9	Observational study	UK	23.5	Cannabis-associated psychosis-like symptoms	CEQ	Other (COMT genotype (rs4680) x caseness (healhy vs psychosis))	-0.007 (-0.168; 0.154)	0.9356	592
	Hindocha et al. (2020)	Hindocha, C., Quattrone, D., Freeman, T.P. et al. Do AKT1, COMT and FAAH influence reports of acute cannabis intoxication experiences in patients with first episode psychosis, controls and young adult cannabis users?. Transl Psychiatry 10, 143 (2020). https://doi.org/10.1038/s41398-020-0823-9	Observational study	UK	23.5	Cannabis-associated psychosis-like symptoms	CEQ	AKT1	0.153 (-0.01; 0.316)	0.06709	578
	Hindocha et al. (2020)	Hindocha, C., Quattrone, D., Freeman, T.P. et al. Do AKT1, COMT and FAAH influence reports of acute cannabis intoxication experiences in patients with first episode psychosis, controls and young adult cannabis users?. Transl Psychiatry 10, 143 (2020). https://doi.org/10.1038/s41398-020-0823-9	Observational study	UK	23.5	Cannabis-associated psychosis-like symptoms	CEQ	Other (AKT genotype (rs2494732) x caseness (healhy vs psychosis))	-0.198 (-0.361; -0.034)	0.01802	578
	Kaufmann et al. (2010)	Kaufmann RM, Kraft B, Frey R, et al. Acute psychotropic effects of oral cannabis extract with a defined content of Delta9-tetrahydrocannabinol (THC) in healthy volunteers. Pharmacopsychiatry. 2010;43(1):24‐32. doi:10.1055/s-0029-1237397	Experiment	Austria	23.6	Cannabis-associated psychosis-like symptoms	BPRS	Single dose THC (versus placebo)	1.242 (0.569; 1.916)	0.0003004	15
	Kaufmann et al. (2010)	Kaufmann RM, Kraft B, Frey R, et al. Acute psychotropic effects of oral cannabis extract with a defined content of Delta9-tetrahydrocannabinol (THC) in healthy volunteers. Pharmacopsychiatry. 2010;43(1):24‐32. doi:10.1055/s-0029-1237397	Experiment	Austria	23.6	Cannabis-associated paranoia	BPRS (paranoia factor)	Single dose THC (versus placebo)	0.571 (0.026; 1.117)	0.04017	15
	Hindocha et al. (2017)	Hindocha, Chandni, T. P. Freeman, J. X. Xia, Natacha DC Shaban, and Helen V. Curran. "Acute memory and psychotomimetic effects of cannabis and tobacco both ‘joint’and individually: a placebo-controlled trial." Psychological medicine 47, no. 15 (2017): 2708-2719.	Experiment	UK	24.5	Cannabis-associated psychosis-like symptoms	PSI	Use of nicotine	0 (-0.48; 0.48)	1	72
	Mokrysz et al. (2016)	Mokrysz, Claire, Tom P. Freeman, Saana Korkki, Kirsty Griffiths, and H. Valerie Curran. "Are adolescents more vulnerable to the harmful effects of cannabis than adults? A placebo-controlled study in human males." Translational psychiatry 6, no. 11 (2016): e961-e961.	Experiment	UK	21.3	Cannabis-associated paranoia	PSI subscale	Single dose THC (versus placebo)	0.369 (0.048; 0.69)	0.02437	40
	Mokrysz et al. (2016)	Mokrysz, Claire, Tom P. Freeman, Saana Korkki, Kirsty Griffiths, and H. Valerie Curran. "Are adolescents more vulnerable to the harmful effects of cannabis than adults? A placebo-controlled study in human males." Translational psychiatry 6, no. 11 (2016): e961-e961.	Experiment	UK	21.3	Cannabis-associated paranoia	PSI subscale	Age	-0.242 (-0.885; 0.401)	0.4612	40
	Dalzell et al. (1986)	Dalzell, A. M., H. Bartlett, and J. S. Lilleyman. "Nabilone: an alternative antiemetic for cancer chemotherapy." Archives of disease in childhood 61, no. 5 (1986): 502-505.	Medicinal cannabis study	UK	8	Cannabis-associated hallucinations	Adverse effects of medicinal cannabis (hallucinations)	Medicinal cannabis (placebo controlled)	0.275 (-0.269; 0.818)	0.3264	54
	Jain et al. (1981)	JAIN, A.K., RYAN, J.R., McMAHON, F.G. and SMITH, G., 1981. Evaluation of intramuscular levonantradol and placebo in acute postoperative pain. The Journal of Clinical Pharmacology, 21(S1), pp.320S-326S.	Medicinal cannabis study	US	28	Cannabis-associated hallucinations	Adverse effects of medicinal cannabis (hallucinations)	Medicinal cannabis (placebo controlled)	0.302 (-0.233; 0.836)	0.2737	56
	Herman et al. (1979)	Herman, Terence S., Lawrence H. Einhorn, Stephen E. Jones, Catherine Nagy, Aurelia B. Chester, Judith C. Dean, Becky Furnas et al. "Superiority of nabilone over prochlorperazine as an antiemetic in patients receiving cancer chemotherapy." New England Journal of Medicine 300, no. 23 (1979): 1295-1297.	Medicinal cannabis study	US	33	Cannabis-associated hallucinations	Adverse effects of medicinal cannabis (hallucinations)	Medicinal cannabis (placebo controlled)	0.219 (0.005; 0.433)	0.04566	340
	Dittrich et al. (1976)	Dittrich A, Bickel P, Schöpf J, Zimmer D. Vergleich veränderter Bewusstseinszustände unter den Halluzinogenen (--)-delta9-trans-Tetrahydrocannabinol (delta9-THC) und N,N-Dimethyltryptamin (DMT) [Comparison of altered states of consciousness induced by the hallucinogens (--)-delta9-trans-tetrahydrocannabinol (delta9-THC) and N,N-dimethyltryptamine (DMT) (author's transl)]. Arch Psychiatr Nervenkr …	Experiment	Germany	27	Cannabis-associated hallucinations	ASC subscale	Single dose THC (versus placebo)	0.902 (0.179; 1.626)	0.01986	36
	Dittrich et al. (1976)	Dittrich A, Bickel P, Schöpf J, Zimmer D. Vergleich veränderter Bewusstseinszustände unter den Halluzinogenen (--)-delta9-trans-Tetrahydrocannabinol (delta9-THC) und N,N-Dimethyltryptamin (DMT) [Comparison of altered states of consciousness induced by the hallucinogens (--)-delta9-trans-tetrahydrocannabinol (delta9-THC) and N,N-dimethyltryptamine (DMT) (author's transl)]. Arch Psychiatr Nervenkr …	Experiment	Germany	27	Cannabis-associated hallucinations	ASC subscale	Single dose THC (versus placebo)	0.802 (0.084; 1.519)	0.03542	36
	Zuurman et al. (2008)	Zuurman, L., C. Roy, R. C. Schoemaker, A. Hazekamp, J. Den Hartigh, J. C. M. E. Bender, R. Verpoorte, J. L. Pinquier, A. F. Cohen, and J. M. A. Van Gerven. "Effect of intrapulmonary tetrahydrocannabinol administration in humans." Journal of psychopharmacology 22, no. 7 (2008): 707-716.	Experiment	Netherlands	23	Cannabis-associated hallucinations	VAS (single item)	Single dose THC (versus placebo)	0.729 (0.031; 1.426)	0.04054	10
	Zuurman et al. (2008)	Zuurman, L., C. Roy, R. C. Schoemaker, A. Hazekamp, J. Den Hartigh, J. C. M. E. Bender, R. Verpoorte, J. L. Pinquier, A. F. Cohen, and J. M. A. Van Gerven. "Effect of intrapulmonary tetrahydrocannabinol administration in humans." Journal of psychopharmacology 22, no. 7 (2008): 707-716.	Experiment	Netherlands	23	Cannabis-associated paranoia	VAS (single item)	Single dose THC (versus placebo)	0.393 (-0.251; 1.036)	0.2316	10
	Kleinloog et al. (2014)	Kleinloog, Daniël, Frits Roozen, Willem De Winter, Jan Freijer, and Joop Van Gerven. "Profiling the subjective effects of Δ9‐tetrahydrocannabinol using visual analogue scales." International journal of methods in psychiatric research 23, no. 2 (2014): 245-256.	Experiment	Netherlands		Cannabis-associated hallucinations	VAS (single item)	Single dose THC (versus placebo)	0.337 (0.059; 0.616)	0.01848	205
	Kleinloog et al. (2014)	Kleinloog, Daniël, Frits Roozen, Willem De Winter, Jan Freijer, and Joop Van Gerven. "Profiling the subjective effects of Δ9‐tetrahydrocannabinol using visual analogue scales." International journal of methods in psychiatric research 23, no. 2 (2014): 245-256.	Experiment	Netherlands		Cannabis-associated hallucinations	VAS (single item)	Single dose THC (versus placebo)	0.731 (0.439; 1.024)	1.919e-06	205
	Kleinloog et al. (2014)	Kleinloog, Daniël, Frits Roozen, Willem De Winter, Jan Freijer, and Joop Van Gerven. "Profiling the subjective effects of Δ9‐tetrahydrocannabinol using visual analogue scales." International journal of methods in psychiatric research 23, no. 2 (2014): 245-256.	Experiment	Netherlands		Cannabis-associated hallucinations	VAS (single item)	Single dose THC (versus placebo)	0.983 (0.677; 1.289)	1.846e-09	205
	Kleinloog et al. (2014)	Kleinloog, Daniël, Frits Roozen, Willem De Winter, Jan Freijer, and Joop Van Gerven. "Profiling the subjective effects of Δ9‐tetrahydrocannabinol using visual analogue scales." International journal of methods in psychiatric research 23, no. 2 (2014): 245-256.	Experiment	Netherlands		Cannabis-associated paranoia	VAS (single item)	Single dose THC (versus placebo)	0.248 (-0.029; 0.524)	0.08064	205
	Kleinloog et al. (2014)	Kleinloog, Daniël, Frits Roozen, Willem De Winter, Jan Freijer, and Joop Van Gerven. "Profiling the subjective effects of Δ9‐tetrahydrocannabinol using visual analogue scales." International journal of methods in psychiatric research 23, no. 2 (2014): 245-256.	Experiment	Netherlands		Cannabis-associated paranoia	VAS (single item)	Single dose THC (versus placebo)	0.539 (0.255; 0.823)	0.0002612	205
	Kleinloog et al. (2014)	Kleinloog, Daniël, Frits Roozen, Willem De Winter, Jan Freijer, and Joop Van Gerven. "Profiling the subjective effects of Δ9‐tetrahydrocannabinol using visual analogue scales." International journal of methods in psychiatric research 23, no. 2 (2014): 245-256.	Experiment	Netherlands		Cannabis-associated paranoia	VAS (single item)	Single dose THC (versus placebo)	0.744 (0.451; 1.037)	1.354e-06	205
	Kleinloog et al. (2014)	Kleinloog, Daniël, Frits Roozen, Willem De Winter, Jan Freijer, and Joop Van Gerven. "Profiling the subjective effects of Δ9‐tetrahydrocannabinol using visual analogue scales." International journal of methods in psychiatric research 23, no. 2 (2014): 245-256.	Experiment	Netherlands		Cannabis-associated paranoia	VAS (single item)	Dose-response effects (THC)	0.28 (0.084; 0.476)	0	615
	Cooper et al. (2017)	Cooper, Ruth E., Emma Williams, Seth Seegobin, Charlotte Tye, Jonna Kuntsi, and Philip Asherson. "Cannabinoids in attention-deficit/hyperactivity disorder: A randomised-controlled trial." European Neuropsychopharmacology 27, no. 8 (2017): 795-808.	Medicinal cannabis study	UK	37.9	Cannabis-associated paranoia	Adverse effects of medicinal cannabis	Medicinal cannabis (placebo controlled)	0 (-1.055; 1.055)	1	14
	Ganesh et al. (2020)	Ganesh, Suhas, Jose Cortes-Briones, Mohini Ranganathan, Rajiv Radhakrishnan, Patrick D. Skosnik, and Deepak Cyril D’Souza. "Psychosis-relevant effects of intravenous delta-9-tetrahydrocannabinol-A mega analysis of individual participant-data from human laboratory studies." International Journal of Neuropsychopharmacology (2020).	Experiment	US	25.3	Cannabis-associated psychosis-like symptoms	PANSS (positive)	Dose-response effects (THC)	0.496 (0.277; 0.715)	1.188e-05	342
	Ganesh et al. (2020)	Ganesh, Suhas, Jose Cortes-Briones, Mohini Ranganathan, Rajiv Radhakrishnan, Patrick D. Skosnik, and Deepak Cyril D’Souza. "Psychosis-relevant effects of intravenous delta-9-tetrahydrocannabinol-A mega analysis of individual participant-data from human laboratory studies." International Journal of Neuropsychopharmacology (2020).	Experiment	US	25.3	Cannabis-associated psychosis-like symptoms	PANSS (positive)	Tolerance	-0.572 (-0.836; -0.307)	3.204e-05	239
	Ganesh et al. (2020)	Ganesh, Suhas, Jose Cortes-Briones, Mohini Ranganathan, Rajiv Radhakrishnan, Patrick D. Skosnik, and Deepak Cyril D’Souza. "Psychosis-relevant effects of intravenous delta-9-tetrahydrocannabinol-A mega analysis of individual participant-data from human laboratory studies." International Journal of Neuropsychopharmacology (2020).	Experiment	US	25.3	Cannabis-associated psychosis-like symptoms	PANSS (positive)	Age	-0.267 (-0.501; -0.033)	0.0259	287
	Ganesh et al. (2020)	Ganesh, Suhas, Jose Cortes-Briones, Mohini Ranganathan, Rajiv Radhakrishnan, Patrick D. Skosnik, and Deepak Cyril D’Souza. "Psychosis-relevant effects of intravenous delta-9-tetrahydrocannabinol-A mega analysis of individual participant-data from human laboratory studies." International Journal of Neuropsychopharmacology (2020).	Experiment	US	25.3	Cannabis-associated psychosis-like symptoms	PANSS (positive)	Gender	0 (-0.196; 0.196)	1	287
	Ganesh et al. (2020)	Ganesh, Suhas, Jose Cortes-Briones, Mohini Ranganathan, Rajiv Radhakrishnan, Patrick D. Skosnik, and Deepak Cyril D’Souza. "Psychosis-relevant effects of intravenous delta-9-tetrahydrocannabinol-A mega analysis of individual participant-data from human laboratory studies." International Journal of Neuropsychopharmacology (2020).	Experiment	US	25.3	Cannabis-associated psychosis-like symptoms	PANSS (positive)	Use of nicotine	-0.382 (-0.638; -0.125)	0.00389	269
	Ranganathan et al. (2012)	Ranganathan, Mohini, Michelle Carbuto, Gabriel Braley, Jaqueline Elander, Edward Perry, Brian Pittman, Rajiv Radhakrishnan, Richard A. Sewell, and Deepak C. D'Souza. "Naltrexone does not attenuate the effects of intravenous Δ9-tetrahydrocannabinol in healthy humans." International Journal of Neuropsychopharmacology 15, no. 9 (2012): 1251-1264.	Experiment	US	27.14	Cannabis-associated psychosis-like symptoms	PANSS (positive)	Opioidergic function	0 (-0.392; 0.392)	1	90
	Freeman et al. (2021)	Freeman, Abigail M., Claire Mokrysz, Chandni Hindocha, Will Lawn, Celia JA Morgan, Tom P. Freeman, Rob Saunders, and H. Valerie Curran. "Does variation in trait schizotypy and frequency of cannabis use influence the acute subjective, cognitive and psychotomimetic effects of delta-9-tetrahydrocannabinol? A mega-analysis." Journal of Psychopharmacology: 0269881120959601.	Experiment	UK	21.8	Cannabis-associated psychosis-like symptoms	PSI (total)	Single dose THC (versus placebo)	0.15 (-0.189; 0.489)	0.38	144
	Freeman et al. (2021)	Freeman, Abigail M., Claire Mokrysz, Chandni Hindocha, Will Lawn, Celia JA Morgan, Tom P. Freeman, Rob Saunders, and H. Valerie Curran. "Does variation in trait schizotypy and frequency of cannabis use influence the acute subjective, cognitive and psychotomimetic effects of delta-9-tetrahydrocannabinol? A mega-analysis." Journal of Psychopharmacology: 0269881120959601.	Experiment	UK	24.5	Cannabis-associated psychosis-like symptoms	PSI (total)	Single dose THC (versus placebo)	0.52 (0.181; 0.859)	0	144
	Freeman et al. (2021)	Freeman, Abigail M., Claire Mokrysz, Chandni Hindocha, Will Lawn, Celia JA Morgan, Tom P. Freeman, Rob Saunders, and H. Valerie Curran. "Does variation in trait schizotypy and frequency of cannabis use influence the acute subjective, cognitive and psychotomimetic effects of delta-9-tetrahydrocannabinol? A mega-analysis." Journal of Psychopharmacology: 0269881120959601.	Experiment	UK	26.9	Cannabis-associated psychosis-like symptoms	PSI (total)	Single dose THC (versus placebo)	0.31 (-0.244; 0.864)	0.27	51
	Freeman et al. (2021)	Freeman, Abigail M., Claire Mokrysz, Chandni Hindocha, Will Lawn, Celia JA Morgan, Tom P. Freeman, Rob Saunders, and H. Valerie Curran. "Does variation in trait schizotypy and frequency of cannabis use influence the acute subjective, cognitive and psychotomimetic effects of delta-9-tetrahydrocannabinol? A mega-analysis." Journal of Psychopharmacology: 0269881120959601.	Experiment	UK	21.3	Cannabis-associated psychosis-like symptoms	PSI (total)	Single dose THC (versus placebo)	0.66 (0.268; 1.052)	0	120
	Freeman et al. (2021)	Freeman, Abigail M., Claire Mokrysz, Chandni Hindocha, Will Lawn, Celia JA Morgan, Tom P. Freeman, Rob Saunders, and H. Valerie Curran. "Does variation in trait schizotypy and frequency of cannabis use influence the acute subjective, cognitive and psychotomimetic effects of delta-9-tetrahydrocannabinol? A mega-analysis." Journal of Psychopharmacology: 0269881120959601.	Experiment	UK	22.7	Cannabis-associated psychosis-like symptoms	PSI (total)	Tolerance	-0.07 (-0.266; 0.126)	0.52	384
	Bonn-Miller et al. (2021)	Bonn-Miller, Marcel O., Sue Sisley, Paula Riggs, Berra Yazar-Klosinski, Julie B. Wang, Mallory JE Loflin, Benjamin Shechet et al. "The short-term impact of 3 smoked cannabis preparations versus placebo on PTSD symptoms: A randomized cross-over clinical trial." Plos one 16, no. 3 (2021): e0246990.	Medicinal cannabis study	US	44.9	Cannabis-associated paranoia	Adverse effects of medicinal cannabis (paranoia)	Medicinal cannabis (placebo controlled)	0.433 (-0.09; 0.955)	0.1098	60
	Bonn-Miller et al. (2021)	Bonn-Miller, Marcel O., Sue Sisley, Paula Riggs, Berra Yazar-Klosinski, Julie B. Wang, Mallory JE Loflin, Benjamin Shechet et al. "The short-term impact of 3 smoked cannabis preparations versus placebo on PTSD symptoms: A randomized cross-over clinical trial." Plos one 16, no. 3 (2021): e0246990.	Medicinal cannabis study	US	44.9	Cannabis-associated hallucinations	Adverse effects of medicinal cannabis (hallucinations)	Medicinal cannabis (placebo controlled)	0.183 (-0.329; 0.696)	0.486	60
	Theunissen et al. (2021)	Theunissen, Eef L., Johannes T. Reckweg, Nadia RPW Hutten, Kim PC Kuypers, Stefan W. Toennes, Merja A. Neukamm, Sebastian Halter, and Johannes G. Ramaekers. "Psychotomimetic symptoms after a moderate dose of a synthetic cannabinoid (JWH-018): implications for psychosis." Psychopharmacology (2021): 1-11.	Experiment	Netherlands	22.8	Cannabis-associated paranoia	Adverse effects of THC (paranoia)	Single dose THC (versus placebo)	0.237 (-0.231; 0.706)	0.3241	72
	Aran et al. (2021)	Aran, Adi, Moria Harel, Hanoch Cassuto, Lola Polyansky, Aviad Schnapp, Nadia Wattad, Dorit Shmueli, Daphna Golan, and F. Xavier Castellanos. "Cannabinoid treatment for autism: a proof-of-concept randomized trial." Molecular autism 12, no. 1 (2021): 1-11.	Medicinal cannabis study	Israel	11.8	Cannabis-associated hallucinations	Adverse effects of medicinal cannabis (hallucinations)	Medicinal cannabis (placebo controlled)	0 (-0.235; 0.235)	1	280
	Aran et al. (2021)	Aran, Adi, Moria Harel, Hanoch Cassuto, Lola Polyansky, Aviad Schnapp, Nadia Wattad, Dorit Shmueli, Daphna Golan, and F. Xavier Castellanos. "Cannabinoid treatment for autism: a proof-of-concept randomized trial." Molecular autism 12, no. 1 (2021): 1-11.	Medicinal cannabis study	Israel	11.8	Cannabis-associated delusions	Adverse effects of medicinal cannabis (delusions)	Medicinal cannabis (placebo controlled)	-0.102 (-0.337; 0.133)	0.3956	280
	Fairhurst et al. (2020)	Fairhurst, Charlie, Ram Kumar, Daniel Checketts, Bola Tayo, and Susie Turner. "Efficacy and safety of nabiximols cannabinoid medicine for paediatric spasticity in cerebral palsy or traumatic brain injury: a randomized controlled trial." Developmental Medicine & Child Neurology 62, no. 9 (2020): 1031-1039.	Medicinal cannabis study	UK,Israel,Czech Republic	12	Cannabis-associated hallucinations	Adverse effects of medicinal cannabis (hallucinations)	Medicinal cannabis (placebo controlled)	0.306 (-0.165; 0.776)	0.2074	72
	Okey et al. (2020)	Okey, Sarah A., and Madeline H. Meier. "A within-person comparison of the subjective effects of higher vs. lower-potency cannabis." Drug and alcohol dependence 216 (2020): 108225.	Observational study	US	32.2	Cannabis-associated psychosis-like symptoms	CEQ-PLE (total score)	Cannabis strain (high in THC)	-0.08 (-0.164; 0.004)	0.06286	545
	Abrams et al. (2020)	Abrams, Donald I., Paul Couey, Niharika Dixit, Varun Sagi, Ward Hagar, Elliott Vichinsky, Mary Ellen Kelly, John E. Connett, and Kalpna Gupta. "Effect of Inhaled Cannabis for Pain in Adults With Sickle Cell Disease: A Randomized Clinical Trial." JAMA network open 3, no. 7 (2020): e2010874-e2010874.	Medicinal cannabis study	US	37.6	Cannabis-associated paranoia	Adverse effects of medicinal cannabis (paranoia)	Medicinal cannabis (placebo controlled)	-0.133 (-0.544; 0.277)	0.5239	23
	Grimison et al. (2020)	Grimison, P., A. Mersiades, A. Kirby, N. Lintzeris, R. Morton, P. Haber, I. Olver et al. "Oral THC: CBD cannabis extract for refractory chemotherapy-induced nausea and vomiting: a randomised, placebo-controlled, phase II crossover trial." Annals of Oncology 31, no. 11 (2020): 1553-1560.# 19 patients received either nabilone (median dose = 0.75 mg) or pla- cebo	Medicinal cannabis study	Australia	55	Cannabis-associated hallucinations	Adverse effects of medicinal cannabis (hallucinations)	Medicinal cannabis (placebo controlled)	0 (-0.277; 0.277)	1	234
	Naef et al. (2003)	Naef, Myrtha, Michele Curatolo, Steen Petersen-Felix, Lars Arendt-Nielsen, Alex Zbinden, and Rudolf Brenneisen. "The analgesic effect of oral delta-9-tetrahydrocannabinol (THC), morphine, and a THC-morphine combination in healthy subjects under experimental pain conditions." Pain 105, no. 1-2 (2003): 79-88.	Experiment	Switzerland	26	Cannabis-associated hallucinations	VAS	Single dose THC (versus placebo)	1.394 (0.583; 2.206)	0.001895	36
	Naef et al. (2003)	Naef, Myrtha, Michele Curatolo, Steen Petersen-Felix, Lars Arendt-Nielsen, Alex Zbinden, and Rudolf Brenneisen. "The analgesic effect of oral delta-9-tetrahydrocannabinol (THC), morphine, and a THC-morphine combination in healthy subjects under experimental pain conditions." Pain 105, no. 1-2 (2003): 79-88.	Experiment	Switzerland	26	Cannabis-associated hallucinations	VAS	Opioidergic function	-0.214 (-0.786; 0.358)	0.4635	12
	Sholler et al. (2020)	Sholler, D.J., Strickland, J.C., Spindle, T.R., Weerts, E.M. and Vandrey, R., 2020. Sex differences in the acute effects of oral and vaporized cannabis among healthy adults. Addiction biology, p.e12968.	Experiment	US	27	Cannabis-associated paranoia	DEQ	Dose-response effects (THC)	0.553 (0.227; 0.88)	0.001112	150
	Sholler et al. (2020)	Sholler, D.J., Strickland, J.C., Spindle, T.R., Weerts, E.M. and Vandrey, R., 2020. Sex differences in the acute effects of oral and vaporized cannabis among healthy adults. Addiction biology, p.e12968.	Experiment	US	27	Cannabis-associated paranoia	DEQ	Route (vaporized)	0.252 (-0.069; 0.573)	0.1265	150
	Sholler et al. (2020)	Sholler, D.J., Strickland, J.C., Spindle, T.R., Weerts, E.M. and Vandrey, R., 2020. Sex differences in the acute effects of oral and vaporized cannabis among healthy adults. Addiction biology, p.e12968.	Experiment	US	27	Cannabis-associated paranoia	DEQ	Gender	-0.249 (-0.57; 0.073)	0.1315	150
	Colizzi et al. (2019)	Colizzi, Marco, Nathalie Weltens, David J. Lythgoe, Steve CR Williams, Lukas Van Oudenhove, and Sagnik Bhattacharyya. "Differential sensitivity to the acute psychotomimetic effects of delta-9-tetrahydrocannabinol associated with its differential acute effects on glial function and cortisol." Psychological Medicine 52, no. 11 (2022): 2024-2031.	Experiment	UK	24.44	Cannabis-associated psychosis-like symptoms	PANSS (positive)	Other (THC-induced change in myo-inositol levels)	-1.326 (-2.479; -0.173)	0.04067	16
	Colizzi et al. (2019)	Colizzi, Marco, Nathalie Weltens, David J. Lythgoe, Steve CR Williams, Lukas Van Oudenhove, and Sagnik Bhattacharyya. "Differential sensitivity to the acute psychotomimetic effects of delta-9-tetrahydrocannabinol associated with its differential acute effects on glial function and cortisol." Psychological Medicine 52, no. 11 (2022): 2024-2031.	Experiment	UK	24.44	Cannabis-associated psychosis-like symptoms	PANSS (positive)	Other (THC-induced change in cortisol levels)	-1.681 (-2.887; -0.474)	0.0163	16
	Bhattacharyya et al. (2018)	Bhattacharyya, Sagnik, Thomas Sainsbury, Paul Allen, Chiara Nosarti, Zerrin Atakan, Vincent Giampietro, Michael Brammer, and P. K. McGuire. "Increased hippocampal engagement during learning as a marker of sensitivity to psychotomimetic effects of δ-9-THC." Psychological medicine 48, no. 16 (2018): 2748-2756.	Experiment	UK	25.97	Cannabis-associated psychosis-like symptoms	PANSS (>3 on PANSS-positive)	Other (Hippocampal activation)	0.98 (0.242; 1.718)	0.01346	36
	Bhattacharyya et al. (2018)	Bhattacharyya, Sagnik, Thomas Sainsbury, Paul Allen, Chiara Nosarti, Zerrin Atakan, Vincent Giampietro, Michael Brammer, and P. K. McGuire. "Increased hippocampal engagement during learning as a marker of sensitivity to psychotomimetic effects of δ-9-THC." Psychological medicine 48, no. 16 (2018): 2748-2756.	Experiment	UK	25.97	Cannabis-associated psychosis-like symptoms	PANSS (>3 on PANSS-positive)	Age	-0.034 (-0.704; 0.637)	0.9224	36
	Bhattacharyya et al. (2018)	Bhattacharyya, Sagnik, Thomas Sainsbury, Paul Allen, Chiara Nosarti, Zerrin Atakan, Vincent Giampietro, Michael Brammer, and P. K. McGuire. "Increased hippocampal engagement during learning as a marker of sensitivity to psychotomimetic effects of δ-9-THC." Psychological medicine 48, no. 16 (2018): 2748-2756.	Experiment	UK	25.97	Cannabis-associated psychosis-like symptoms	PANSS (>3 on PANSS-positive)	Other (Intellectual functioning)	-0.176 (-0.847; 0.495)	0.611	36
	Bhattacharyya et al. (2018)	Bhattacharyya, Sagnik, Thomas Sainsbury, Paul Allen, Chiara Nosarti, Zerrin Atakan, Vincent Giampietro, Michael Brammer, and P. K. McGuire. "Increased hippocampal engagement during learning as a marker of sensitivity to psychotomimetic effects of δ-9-THC." Psychological medicine 48, no. 16 (2018): 2748-2756.	Experiment	UK	25.97	Cannabis-associated psychosis-like symptoms	PANSS (>3 on PANSS-positive)	Education	-0.194 (-0.866; 0.477)	0.5745	36
	Bhattacharyya et al. (2018)	Bhattacharyya, Sagnik, Thomas Sainsbury, Paul Allen, Chiara Nosarti, Zerrin Atakan, Vincent Giampietro, Michael Brammer, and P. K. McGuire. "Increased hippocampal engagement during learning as a marker of sensitivity to psychotomimetic effects of δ-9-THC." Psychological medicine 48, no. 16 (2018): 2748-2756.	Experiment	UK	25.97	Cannabis-associated psychosis-like symptoms	PANSS (>3 on PANSS-positive)	Use of nicotine	0.084 (-0.587; 0.754)	0.8081	36
	Bhattacharyya et al. (2018)	Bhattacharyya, Sagnik, Thomas Sainsbury, Paul Allen, Chiara Nosarti, Zerrin Atakan, Vincent Giampietro, Michael Brammer, and P. K. McGuire. "Increased hippocampal engagement during learning as a marker of sensitivity to psychotomimetic effects of δ-9-THC." Psychological medicine 48, no. 16 (2018): 2748-2756.	Experiment	UK	25.97	Cannabis-associated psychosis-like symptoms	PANSS (>3 on PANSS-positive)	Tolerance	-0.258 (-0.931; 0.414)	0.4567	36
	Bhattacharyya et al. (2018)	Bhattacharyya, Sagnik, Thomas Sainsbury, Paul Allen, Chiara Nosarti, Zerrin Atakan, Vincent Giampietro, Michael Brammer, and P. K. McGuire. "Increased hippocampal engagement during learning as a marker of sensitivity to psychotomimetic effects of δ-9-THC." Psychological medicine 48, no. 16 (2018): 2748-2756.	Experiment	UK	25.97	Cannabis-associated psychosis-like symptoms	PANSS (>3 on PANSS-positive)	Caffeine	0.026 (-0.644; 0.697)	0.9387	36
	Bhattacharyya et al. (2018)	Bhattacharyya, Sagnik, Thomas Sainsbury, Paul Allen, Chiara Nosarti, Zerrin Atakan, Vincent Giampietro, Michael Brammer, and P. K. McGuire. "Increased hippocampal engagement during learning as a marker of sensitivity to psychotomimetic effects of δ-9-THC." Psychological medicine 48, no. 16 (2018): 2748-2756.	Experiment	UK	25.97	Cannabis-associated psychosis-like symptoms	PANSS (>3 on PANSS-positive)	Use of alcohol	-0.176 (-1.049; 0.698)	0.6936	36
	Bhattacharyya et al. (2018)	Bhattacharyya, Sagnik, Thomas Sainsbury, Paul Allen, Chiara Nosarti, Zerrin Atakan, Vincent Giampietro, Michael Brammer, and P. K. McGuire. "Increased hippocampal engagement during learning as a marker of sensitivity to psychotomimetic effects of δ-9-THC." Psychological medicine 48, no. 16 (2018): 2748-2756.	Experiment	UK	25.97	Cannabis-associated psychosis-like symptoms	PANSS (>3 on PANSS-positive)	Use of stimulants	1.173 (-0.104; 2.451)	0.07183	36
	Bhattacharyya et al. (2018)	Bhattacharyya, Sagnik, Thomas Sainsbury, Paul Allen, Chiara Nosarti, Zerrin Atakan, Vincent Giampietro, Michael Brammer, and P. K. McGuire. "Increased hippocampal engagement during learning as a marker of sensitivity to psychotomimetic effects of δ-9-THC." Psychological medicine 48, no. 16 (2018): 2748-2756.	Experiment	UK	25.97	Cannabis-associated psychosis-like symptoms	PANSS (>3 on PANSS-positive)	Use of hallucinogens	-0.296 (-1.156; 0.564)	0.4999	36
	Bhattacharyya et al. (2018)	Bhattacharyya, Sagnik, Thomas Sainsbury, Paul Allen, Chiara Nosarti, Zerrin Atakan, Vincent Giampietro, Michael Brammer, and P. K. McGuire. "Increased hippocampal engagement during learning as a marker of sensitivity to psychotomimetic effects of δ-9-THC." Psychological medicine 48, no. 16 (2018): 2748-2756.	Experiment	UK	25.97	Cannabis-associated psychosis-like symptoms	PANSS (>3 on PANSS-positive)	Use of cocaine	-0.145 (-1.523; 1.234)	0.837	36
	Bhattacharyya et al. (2018)	Bhattacharyya, Sagnik, Thomas Sainsbury, Paul Allen, Chiara Nosarti, Zerrin Atakan, Vincent Giampietro, Michael Brammer, and P. K. McGuire. "Increased hippocampal engagement during learning as a marker of sensitivity to psychotomimetic effects of δ-9-THC." Psychological medicine 48, no. 16 (2018): 2748-2756.	Experiment	UK	25.97	Cannabis-associated psychosis-like symptoms	PANSS (>3 on PANSS-positive)	Use of MDMA	-0.085 (-0.893; 0.723)	0.8367	36
	Bhattacharyya et al. (2018)	Bhattacharyya, Sagnik, Thomas Sainsbury, Paul Allen, Chiara Nosarti, Zerrin Atakan, Vincent Giampietro, Michael Brammer, and P. K. McGuire. "Increased hippocampal engagement during learning as a marker of sensitivity to psychotomimetic effects of δ-9-THC." Psychological medicine 48, no. 16 (2018): 2748-2756.	Experiment	UK	25.97	Cannabis-associated psychosis-like symptoms	PANSS (>3 on PANSS-positive)	Opioid	0.264 (-1.311; 1.839)	0.7421	36
	Abdallah et al. (2018)	Abdallah, Sara J., Benjamin M. Smith, Mark A. Ware, Michelle Moore, Pei Zhi Li, Jean Bourbeau, and Dennis Jensen. "Effect of vaporized cannabis on exertional breathlessness and exercise endurance in advanced chronic obstructive pulmonary disease. A randomized controlled trial." Annals of the American Thoracic Society 15, no. 10 (2018): 1146-1158.	Medicinal cannabis study	Canada	65	Cannabis-associated paranoia	VAS	Medicinal cannabis (placebo controlled)	0.262 (-0.723; 1.246)	0.6025	16
	Bloomfield et al. (2016)	Bloomfield, M. A. P., E. Mouchlianitis, C. J. A. Morgan, T. P. Freeman, H. V. Curran, J. P. Roiser, and O. D. Howes. "Salience attribution and its relationship to cannabis-induced psychotic symptoms." Psychological medicine 46, no. 16 (2016): 3383-3395.	Experiment	UK	22.4	Cannabis-associated psychosis-like symptoms	PSI (total)	Other (Aberrant salience (explicit))	1.54 (0.303; 2.776)	0.0267	17
	Bloomfield et al. (2016)	Bloomfield, M. A. P., E. Mouchlianitis, C. J. A. Morgan, T. P. Freeman, H. V. Curran, J. P. Roiser, and O. D. Howes. "Salience attribution and its relationship to cannabis-induced psychotic symptoms." Psychological medicine 46, no. 16 (2016): 3383-3395.	Experiment	UK	22.4	Cannabis-associated psychosis-like symptoms	PSI (total)	Other (Aberrant salience (implicit))	0 (-0.951; 0.951)	1	17
	Bhattacharyya et al. (2015)	Bhattacharyya, Sagnik, Z. Atakan, R. Martin-Santos, J. A. Crippa, J. Kambeitz, S. Malhi, V. Giampietro et al. "Impairment of inhibitory control processing related to acute psychotomimetic effects of cannabis." European Neuropsychopharmacology 25, no. 1 (2015): 26-37.	Experiment	UK	25.97	Cannabis-associated psychosis-like symptoms	PANSS (positive)	Single dose THC (versus placebo)	0.726 (0.359; 1.093)	0.0001071	36
	Bhattacharyya et al. (2015)	Bhattacharyya, Sagnik, Z. Atakan, R. Martin-Santos, J. A. Crippa, J. Kambeitz, S. Malhi, V. Giampietro et al. "Impairment of inhibitory control processing related to acute psychotomimetic effects of cannabis." European Neuropsychopharmacology 25, no. 1 (2015): 26-37.	Experiment	UK	25.97	Cannabis-associated psychosis-like symptoms	PANSS (positive)	Other (Inhibitory processing)	1.07 (0.311; 1.829)	0.01	36
	Bhattacharyya et al. (2015)	Bhattacharyya, Sagnik, Z. Atakan, R. Martin-Santos, J. A. Crippa, J. Kambeitz, S. Malhi, V. Giampietro et al. "Impairment of inhibitory control processing related to acute psychotomimetic effects of cannabis." European Neuropsychopharmacology 25, no. 1 (2015): 26-37.	Experiment	UK	25.97	Cannabis-associated psychosis-like symptoms	PANSS (positive)	Other (THC-induced inhibitory impairment)	-0.82 (-1.527; -0.113)	0.03	36
	Cortes-Briones et al. (2015)	Cortes-Briones, Jose A., John D. Cahill, Patrick D. Skosnik, Daniel H. Mathalon, Ashley Williams, R. Andrew Sewell, Brian J. Roach, Judith M. Ford, Mohini Ranganathan, and Deepak Cyril D’Souza. "The psychosis-like effects of Δ9-tetrahydrocannabinol are associated with increased cortical noise in healthy humans." Biological psychiatry 78, no. 11 (2015): 805-813.	Experiment	US	26.21	Cannabis-associated psychosis-like symptoms	PANSS (positive)	Single dose THC (versus placebo)	0.969 (0.473; 1.464)	0.0001267	23
	Cortes-Briones et al. (2015)	Cortes-Briones, Jose A., John D. Cahill, Patrick D. Skosnik, Daniel H. Mathalon, Ashley Williams, R. Andrew Sewell, Brian J. Roach, Judith M. Ford, Mohini Ranganathan, and Deepak Cyril D’Souza. "The psychosis-like effects of Δ9-tetrahydrocannabinol are associated with increased cortical noise in healthy humans." Biological psychiatry 78, no. 11 (2015): 805-813.	Experiment	US	26.21	Cannabis-associated psychosis-like symptoms	PANSS (positive)	Single dose THC (versus placebo)	1.607 (0.988; 2.226)	3.551e-07	23
	Cortes-Briones et al. (2015)	Cortes-Briones, Jose A., John D. Cahill, Patrick D. Skosnik, Daniel H. Mathalon, Ashley Williams, R. Andrew Sewell, Brian J. Roach, Judith M. Ford, Mohini Ranganathan, and Deepak Cyril D’Souza. "The psychosis-like effects of Δ9-tetrahydrocannabinol are associated with increased cortical noise in healthy humans." Biological psychiatry 78, no. 11 (2015): 805-813.	Experiment	US	26.21	Cannabis-associated psychosis-like symptoms	PANSS (positive)	Other (Neural noise)	0.99 (0.05; 1.93)	0.05	23
	D'Souza et al. (2012)	D'Souza, Deepak Cyril, Daniel J. Fridberg, Patrick D. Skosnik, Ashley Williams, Brian Roach, Nagendra Singh, Michelle Carbuto et al. "Dose-related modulation of event-related potentials to novel and target stimuli by intravenous Δ 9-THC in humans." Neuropsychopharmacology 37, no. 7 (2012): 1632-1646.	Experiment	US	25.9	Cannabis-associated psychosis-like symptoms	PANSS (positive)	Other (P3b amplitude)	-0.54 (-1.348; 0.268)	0.21	26
	D'Souza et al. (2012)	D'Souza, Deepak Cyril, Daniel J. Fridberg, Patrick D. Skosnik, Ashley Williams, Brian Roach, Nagendra Singh, Michelle Carbuto et al. "Dose-related modulation of event-related potentials to novel and target stimuli by intravenous Δ 9-THC in humans." Neuropsychopharmacology 37, no. 7 (2012): 1632-1646.	Experiment	US	25.9	Cannabis-associated psychosis-like symptoms	PANSS (positive)	Other (P3b amplitude)	-0.5 (-1.308; 0.308)	0.24	26
	D'Souza et al. (2012)	D'Souza, Deepak Cyril, Daniel J. Fridberg, Patrick D. Skosnik, Ashley Williams, Brian Roach, Nagendra Singh, Michelle Carbuto et al. "Dose-related modulation of event-related potentials to novel and target stimuli by intravenous Δ 9-THC in humans." Neuropsychopharmacology 37, no. 7 (2012): 1632-1646.	Experiment	US	25.9	Cannabis-associated psychosis-like symptoms	PANSS (positive)	Other (P3b latency)	-0.23 (-1.014; 0.554)	0.58	26
	D'Souza et al. (2012)	D'Souza, Deepak Cyril, Daniel J. Fridberg, Patrick D. Skosnik, Ashley Williams, Brian Roach, Nagendra Singh, Michelle Carbuto et al. "Dose-related modulation of event-related potentials to novel and target stimuli by intravenous Δ 9-THC in humans." Neuropsychopharmacology 37, no. 7 (2012): 1632-1646.	Experiment	US	25.9	Cannabis-associated psychosis-like symptoms	PANSS (positive)	Other (P3a latency)	-0.06 (-0.844; 0.724)	0.89	26
	Kleinloog et al. (2014)	Kleinloog, Daniël, Jasper Stevens, Jules Heuberger, Philip Spinhoven, and Joop van Gerven. "The influence of personality on the sensitivity to subjective effects of Δ9-tetrahydrocannabinol." Psychiatry research 220, no. 3 (2014): 945-953.	Experiment	Netherlands	22	Cannabis-associated psychosis-like symptoms	PANSS (positive)	Personality	0.23 (-0.109; 0.569)	0.2	127
	Kleinloog et al. (2014)	Kleinloog, Daniël, Jasper Stevens, Jules Heuberger, Philip Spinhoven, and Joop van Gerven. "The influence of personality on the sensitivity to subjective effects of Δ9-tetrahydrocannabinol." Psychiatry research 220, no. 3 (2014): 945-953.	Experiment	Netherlands	22	Cannabis-associated psychosis-like symptoms	PANSS (positive)	Personality	0.21 (-0.129; 0.549)	0.25	127
	Kleinloog et al. (2014)	Kleinloog, Daniël, Jasper Stevens, Jules Heuberger, Philip Spinhoven, and Joop van Gerven. "The influence of personality on the sensitivity to subjective effects of Δ9-tetrahydrocannabinol." Psychiatry research 220, no. 3 (2014): 945-953.	Experiment	Netherlands	22	Cannabis-associated psychosis-like symptoms	PANSS (positive)	Personality	0.16 (-0.179; 0.499)	0.36	127
	Kleinloog et al. (2014)	Kleinloog, Daniël, Jasper Stevens, Jules Heuberger, Philip Spinhoven, and Joop van Gerven. "The influence of personality on the sensitivity to subjective effects of Δ9-tetrahydrocannabinol." Psychiatry research 220, no. 3 (2014): 945-953.	Experiment	Netherlands	22	Cannabis-associated psychosis-like symptoms	PANSS (positive)	Personality	0.25 (-0.089; 0.589)	0.17	127
	Kleinloog et al. (2014)	Kleinloog, Daniël, Jasper Stevens, Jules Heuberger, Philip Spinhoven, and Joop van Gerven. "The influence of personality on the sensitivity to subjective effects of Δ9-tetrahydrocannabinol." Psychiatry research 220, no. 3 (2014): 945-953.	Experiment	Netherlands	22	Cannabis-associated psychosis-like symptoms	PANSS (positive)	Personality	0.16 (-0.179; 0.499)	0.38	127
	Kleinloog et al. (2014)	Kleinloog, Daniël, Jasper Stevens, Jules Heuberger, Philip Spinhoven, and Joop van Gerven. "The influence of personality on the sensitivity to subjective effects of Δ9-tetrahydrocannabinol." Psychiatry research 220, no. 3 (2014): 945-953.	Experiment	Netherlands	22	Cannabis-associated psychosis-like symptoms	PANSS (positive)	Personality	0.09 (-0.249; 0.429)	0.61	127
	Kleinloog et al. (2014)	Kleinloog, Daniël, Jasper Stevens, Jules Heuberger, Philip Spinhoven, and Joop van Gerven. "The influence of personality on the sensitivity to subjective effects of Δ9-tetrahydrocannabinol." Psychiatry research 220, no. 3 (2014): 945-953.	Experiment	Netherlands	22	Cannabis-associated psychosis-like symptoms	PANSS (positive)	Personality	0.43 (0.091; 0.769)	0.02	127
	Ahmed et al. (2014)	Ahmed, Amir IA, Geke AH van den Elsen, Angela Colbers, Marjolein A. van der Marck, David M. Burger, Ton B. Feuth, Marcel GM Olde Rikkert, and Cornelis Kramers. "Safety and pharmacokinetics of oral delta-9-tetrahydrocannabinol in healthy older subjects: a randomized controlled trial." European Neuropsychopharmacology 24, no. 9 (2014): 1475-1482.	Medicinal cannabis study	Netherlands	72	Cannabis-associated hallucinations	Adverse effects of medicinal cannabis (hallucinations)	Medicinal cannabis (placebo controlled)	0.526 (-0.203; 1.255)	0.1674	32
	Portenoy et al. (2012)	Portenoy, R.K., Ganae-Motan, E.D., Allende, S., Yanagihara, R., Shaiova, L., Weinstein, S., McQuade, R., Wright, S. and Fallon, M.T., 2012. Nabiximols for opioid-treated cancer patients with poorly-controlled chronic pain: a randomized, placebo-controlled, graded-dose trial. The Journal of Pain, 13(5), pp.438-449.	Medicinal cannabis study	US		Cannabis-associated hallucinations	Adverse effects of medicinal cannabis (hallucinations)	Medicinal cannabis (placebo controlled)	0.117 (-0.091; 0.324)	0.2703	359
	Morrison et al. (2011)	Morrison, Paul D., Judith Nottage, James M. Stone, Sagnik Bhattacharyya, Nigel Tunstall, Rudolf Brenneisen, David Holt et al. "Disruption of frontal theta coherence by Δ 9-tetrahydrocannabinol is associated with positive psychotic symptoms." Neuropsychopharmacology 36, no. 4 (2011): 827-836.	Experiment	UK	26	Cannabis-associated psychosis-like symptoms	PANSS (positive)	Other (Theta power (EEG))	0 (-1.012; 1.012)	1	16
	Morrison et al. (2011)	Morrison, Paul D., Judith Nottage, James M. Stone, Sagnik Bhattacharyya, Nigel Tunstall, Rudolf Brenneisen, David Holt et al. "Disruption of frontal theta coherence by Δ 9-tetrahydrocannabinol is associated with positive psychotic symptoms." Neuropsychopharmacology 36, no. 4 (2011): 827-836.	Experiment	UK	26	Cannabis-associated psychosis-like symptoms	PANSS (positive)	Other (Theta coherence (EEG))	2.268 (0.738; 3.798)	0.01089	16
	Ware et al. (2010)	Ware, Mark A., Tongtong Wang, Stan Shapiro, Ann Robinson, Thierry Ducruet, Thao Huynh, Ann Gamsa, Gary J. Bennett, and Jean-Paul Collet. "Smoked cannabis for chronic neuropathic pain: a randomized controlled trial." Cmaj 182, no. 14 (2010): E694-E701.	Medicinal cannabis study	Canada	45.4	Cannabis-associated paranoia	Adverse effects of medicinal cannabis (paranoia)	Medicinal cannabis (placebo controlled)	0.362 (-0.14; 0.864)	0.1622	64
	Bhattacharyya et al. (2010)	Bhattacharyya, Sagnik, Paul D. Morrison, Paolo Fusar-Poli, Rocio Martin-Santos, Stefan Borgwardt, Toby Winton-Brown, Chiara Nosarti et al. "Opposite effects of Δ-9-tetrahydrocannabinol and cannabidiol on human brain function and psychopathology." Neuropsychopharmacology 35, no. 3 (2010): 764-774.	Experiment	UK	26	Cannabis-associated psychosis-like symptoms	PANSS (positive)	Other (THC-induced changes in striatum)	-1.4 (-2.685; -0.115)	0.05	15
	Bhattacharyya et al. (2009)	Bhattacharyya, Sagnik, Paolo Fusar-Poli, Stefan Borgwardt, Rocio Martin-Santos, Chiara Nosarti, Colin O’Carroll, Paul Allen et al. "Modulation of mediotemporal and ventrostriatal function in humans by Δ9-tetrahydrocannabinol: a neural basis for the effects of Cannabis sativa on learning and psychosis." Archives of general psychiatry 66, no. 4 (2009): 442-451.	Experiment	UK	26	Cannabis-associated psychosis-like symptoms	PANSS (positive)	Other (THC-induced changes in ventral stiatum)	1.05 (-0.126; 2.226)	0.1	15
	Bhattacharyya et al. (2009)	Bhattacharyya, Sagnik, Paolo Fusar-Poli, Stefan Borgwardt, Rocio Martin-Santos, Chiara Nosarti, Colin O’Carroll, Paul Allen et al. "Modulation of mediotemporal and ventrostriatal function in humans by Δ9-tetrahydrocannabinol: a neural basis for the effects of Cannabis sativa on learning and psychosis." Archives of general psychiatry 66, no. 4 (2009): 442-451.	Experiment	UK	26	Cannabis-associated psychosis-like symptoms	PANSS (positive)	Other (THC-induced changes in rostro-anterior cingulate cortex)	0.84 (-0.303; 1.983)	0.17	15
	Abrams et al. (2007)	Abrams, Donald I., C. A. Jay, S. B. Shade, H. Vizoso, H. Reda, S. Press, M. E. Kelly, M. C. Rowbotham, and K. L. Petersen. "Cannabis in painful HIV-associated sensory neuropathy: a randomized placebo-controlled trial." Neurology 68, no. 7 (2007): 515-521.	Medicinal cannabis study	US	49	Cannabis-associated paranoia	Adverse effects of medicinal cannabis (paranoia)	Medicinal cannabis (placebo controlled)	0.22 (-0.299; 0.739)	0.43	54
	Haney et al. (2007)	Haney, Margaret. "Opioid antagonism of cannabinoid effects: differences between marijuana smokers and nonmarijuana smokers." Neuropsychopharmacology 32, no. 6 (2007): 1391-1403.	Experiment	US	29.7	Cannabis-associated paranoia	Side effects of THC (paranoia)	Opioidergic function	-0.463 (-0.974; 0.048)	0.08095	63
	Haney et al. (2007)	Haney, Margaret. "Opioid antagonism of cannabinoid effects: differences between marijuana smokers and nonmarijuana smokers." Neuropsychopharmacology 32, no. 6 (2007): 1391-1403.	Experiment	US	29.7	Cannabis-associated paranoia	Side effects of THC (paranoia)	Single dose THC (versus placebo)	0.365 (-0.141; 0.871)	0.1624	63
	Buggy et al. (2003)	Buggy, Donal J., Lynn Toogood, Shelagh Maric, Paul Sharpe, David G. Lambert, and David J. Rowbotham. "Lack of analgesic efficacy of oral δ-9-tetrahydrocannabinol in postoperative pain." Pain 106, no. 1-2 (2003): 169-172.	Medicinal cannabis study	UK	45	Cannabis-associated hallucinations	Adverse effects of medicinal cannabis (hallucinations)	Medicinal cannabis (placebo controlled)	-0.32 (-0.956; 0.316)	0.3297	40
	Noyes et al. (1976)	Noyes, Russell, S. Fred Brunk, David H. Avery, and Arthur Canter. "Psychologic effects of oral delta-9-tetrahydrocannabinol in advanced cancer patients." Comprehensive psychiatry (1976).	Medicinal cannabis study	US	51	Cannabis-associated hallucinations	SDES	Medicinal cannabis (placebo controlled)	0.56 (0.204; 0.916)	0.002493	132
	Kassim et al. (2022)	Kassim, Faiz M., Sophie Tod, Jennifer Rodger, Sean D. Hood, Joseph WY Lee, Matthew A. Albrecht, and Mathew T. Martin-Iverson. "Nabilone Impairs Spatial and Verbal Working Memory in Healthy Volunteers." Cannabis and Cannabinoid Research (2022).	Observational study	Australia	25.9	Cannabis-associated psychosis-like symptoms	Summary score (BPRS, PANSS-positive, LSHS-R, MIS, PAS)	Single dose THC (versus placebo)	0.16 (-0.303; 0.623)	0.5007	72
	Schoeler et al. (2022)	Schoeler, Tabea, Jason Ferris, and Adam R. Winstock. "Rates and correlates of cannabis-associated psychotic symptoms in over 230,000 people who use cannabis." Translational psychiatry 12, no. 1 (2022): 1-8.	Observational study	Wordwide		Cannabis-associated psychosis-like symptoms	Single item (have you ever sought emergency medical treatment [for hallucinations or paranoia] following your use of cannabis?)	Gender	-0.206 (-0.344; -0.068)	0.003349	146561
	Schoeler et al. (2022)	Schoeler, Tabea, Jason Ferris, and Adam R. Winstock. "Rates and correlates of cannabis-associated psychotic symptoms in over 230,000 people who use cannabis." Translational psychiatry 12, no. 1 (2022): 1-8.	Observational study	Wordwide		Cannabis-associated psychosis-like symptoms	Single item (have you ever sought emergency medical treatment [for hallucinations or paranoia] following your use of cannabis?)	Age	-0.54 (-0.672; -0.408)	1.143e-15	147625
	Schoeler et al. (2022)	Schoeler, Tabea, Jason Ferris, and Adam R. Winstock. "Rates and correlates of cannabis-associated psychotic symptoms in over 230,000 people who use cannabis." Translational psychiatry 12, no. 1 (2022): 1-8.	Observational study	Wordwide		Cannabis-associated psychosis-like symptoms	Single item (have you ever sought emergency medical treatment [for hallucinations or paranoia] following your use of cannabis?)	Other (Exercise)	-0.09 (-0.236; 0.055)	0.2248	125732
	Schoeler et al. (2022)	Schoeler, Tabea, Jason Ferris, and Adam R. Winstock. "Rates and correlates of cannabis-associated psychotic symptoms in over 230,000 people who use cannabis." Translational psychiatry 12, no. 1 (2022): 1-8.	Observational study	Wordwide		Cannabis-associated psychosis-like symptoms	Single item (have you ever sought emergency medical treatment [for hallucinations or paranoia] following your use of cannabis?)	Education	0.164 (-0.072; 0.4)	0.1726	71657
	Schoeler et al. (2022)	Schoeler, Tabea, Jason Ferris, and Adam R. Winstock. "Rates and correlates of cannabis-associated psychotic symptoms in over 230,000 people who use cannabis." Translational psychiatry 12, no. 1 (2022): 1-8.	Observational study	Wordwide		Cannabis-associated psychosis-like symptoms	Single item (have you ever sought emergency medical treatment [for hallucinations or paranoia] following your use of cannabis?)	Other (Underweight)	0.04 (-0.184; 0.265)	0.7244	62735
	Schoeler et al. (2022)	Schoeler, Tabea, Jason Ferris, and Adam R. Winstock. "Rates and correlates of cannabis-associated psychotic symptoms in over 230,000 people who use cannabis." Translational psychiatry 12, no. 1 (2022): 1-8.	Observational study	Wordwide		Cannabis-associated psychosis-like symptoms	Single item (have you ever sought emergency medical treatment [for hallucinations or paranoia] following your use of cannabis?)	Other (Overweight)	-0.046 (-0.221; 0.129)	0.6088	84441
	Schoeler et al. (2022)	Schoeler, Tabea, Jason Ferris, and Adam R. Winstock. "Rates and correlates of cannabis-associated psychotic symptoms in over 230,000 people who use cannabis." Translational psychiatry 12, no. 1 (2022): 1-8.	Observational study	Wordwide		Cannabis-associated psychosis-like symptoms	Single item (have you ever sought emergency medical treatment [for hallucinations or paranoia] following your use of cannabis?)	Reason (medicinal vs. recreational)	-0.064 (-0.31; 0.181)	0.608	146795
	Schoeler et al. (2022)	Schoeler, Tabea, Jason Ferris, and Adam R. Winstock. "Rates and correlates of cannabis-associated psychotic symptoms in over 230,000 people who use cannabis." Translational psychiatry 12, no. 1 (2022): 1-8.	Observational study	Wordwide		Cannabis-associated psychosis-like symptoms	Single item (have you ever sought emergency medical treatment [for hallucinations or paranoia] following your use of cannabis?)	Cannabis strain (high in THC)	-0.021 (-0.171; 0.129)	0.783	120560
	Schoeler et al. (2022)	Schoeler, Tabea, Jason Ferris, and Adam R. Winstock. "Rates and correlates of cannabis-associated psychotic symptoms in over 230,000 people who use cannabis." Translational psychiatry 12, no. 1 (2022): 1-8.	Observational study	Wordwide		Cannabis-associated psychosis-like symptoms	Single item (have you ever sought emergency medical treatment [for hallucinations or paranoia] following your use of cannabis?)	Severity of cannabis use	-0.095 (-0.227; 0.037)	0.159	148109
	Schoeler et al. (2022)	Schoeler, Tabea, Jason Ferris, and Adam R. Winstock. "Rates and correlates of cannabis-associated psychotic symptoms in over 230,000 people who use cannabis." Translational psychiatry 12, no. 1 (2022): 1-8.	Observational study	Wordwide		Cannabis-associated psychosis-like symptoms	Single item (have you ever sought emergency medical treatment [for hallucinations or paranoia] following your use of cannabis?)	Use of nicotine	0.423 (0.288; 0.557)	8.458e-10	139082
	Schoeler et al. (2022)	Schoeler, Tabea, Jason Ferris, and Adam R. Winstock. "Rates and correlates of cannabis-associated psychotic symptoms in over 230,000 people who use cannabis." Translational psychiatry 12, no. 1 (2022): 1-8.	Observational study	Wordwide		Cannabis-associated psychosis-like symptoms	Single item (have you ever sought emergency medical treatment [for hallucinations or paranoia] following your use of cannabis?)	Other (ROA (eaten))	-0.106 (-0.736; 0.525)	0.7428	66503
	Schoeler et al. (2022)	Schoeler, Tabea, Jason Ferris, and Adam R. Winstock. "Rates and correlates of cannabis-associated psychotic symptoms in over 230,000 people who use cannabis." Translational psychiatry 12, no. 1 (2022): 1-8.	Observational study	Wordwide		Cannabis-associated psychosis-like symptoms	Single item (have you ever sought emergency medical treatment [for hallucinations or paranoia] following your use of cannabis?)	Other (ROA (knife))	-0.472 (-1.56; 0.615)	0.3943	65216
	Schoeler et al. (2022)	Schoeler, Tabea, Jason Ferris, and Adam R. Winstock. "Rates and correlates of cannabis-associated psychotic symptoms in over 230,000 people who use cannabis." Translational psychiatry 12, no. 1 (2022): 1-8.	Observational study	Wordwide		Cannabis-associated psychosis-like symptoms	Single item (have you ever sought emergency medical treatment [for hallucinations or paranoia] following your use of cannabis?)	Other (ROA (pipe))	-0.083 (-0.278; 0.112)	0.4057	82766
	Schoeler et al. (2022)	Schoeler, Tabea, Jason Ferris, and Adam R. Winstock. "Rates and correlates of cannabis-associated psychotic symptoms in over 230,000 people who use cannabis." Translational psychiatry 12, no. 1 (2022): 1-8.	Observational study	Wordwide		Cannabis-associated psychosis-like symptoms	Single item (have you ever sought emergency medical treatment [for hallucinations or paranoia] following your use of cannabis?)	Other (ROA (vape))	-0.734 (-1.364; -0.105)	0.02228	69601
	Schoeler et al. (2022)	Schoeler, Tabea, Jason Ferris, and Adam R. Winstock. "Rates and correlates of cannabis-associated psychotic symptoms in over 230,000 people who use cannabis." Translational psychiatry 12, no. 1 (2022): 1-8.	Observational study	Wordwide		Cannabis-associated psychosis-like symptoms	Single item (have you ever sought emergency medical treatment [for hallucinations or paranoia] following your use of cannabis?)	Use of alcohol	-0.324 (-0.564; -0.083)	0.008275	146463
	Schoeler et al. (2022)	Schoeler, Tabea, Jason Ferris, and Adam R. Winstock. "Rates and correlates of cannabis-associated psychotic symptoms in over 230,000 people who use cannabis." Translational psychiatry 12, no. 1 (2022): 1-8.	Observational study	Wordwide		Cannabis-associated psychosis-like symptoms	Single item (have you ever sought emergency medical treatment [for hallucinations or paranoia] following your use of cannabis?)	Use of cocaine	-0.067 (-0.223; 0.088)	0.3957	90047
	Schoeler et al. (2022)	Schoeler, Tabea, Jason Ferris, and Adam R. Winstock. "Rates and correlates of cannabis-associated psychotic symptoms in over 230,000 people who use cannabis." Translational psychiatry 12, no. 1 (2022): 1-8.	Observational study	Wordwide		Cannabis-associated psychosis-like symptoms	Single item (have you ever sought emergency medical treatment [for hallucinations or paranoia] following your use of cannabis?)	Use of MDMA	0.208 (0.042; 0.374)	0.01404	95596
	Schoeler et al. (2022)	Schoeler, Tabea, Jason Ferris, and Adam R. Winstock. "Rates and correlates of cannabis-associated psychotic symptoms in over 230,000 people who use cannabis." Translational psychiatry 12, no. 1 (2022): 1-8.	Observational study	Wordwide		Cannabis-associated psychosis-like symptoms	Single item (have you ever sought emergency medical treatment [for hallucinations or paranoia] following your use of cannabis?)	Use of stimulants	0.143 (-0.017; 0.302)	0.07986	78752
	Schoeler et al. (2022)	Schoeler, Tabea, Jason Ferris, and Adam R. Winstock. "Rates and correlates of cannabis-associated psychotic symptoms in over 230,000 people who use cannabis." Translational psychiatry 12, no. 1 (2022): 1-8.	Observational study	Wordwide		Cannabis-associated psychosis-like symptoms	Single item (have you ever sought emergency medical treatment [for hallucinations or paranoia] following your use of cannabis?)	Use of stimulants	0.103 (-0.197; 0.402)	0.5025	43484
	Schoeler et al. (2022)	Schoeler, Tabea, Jason Ferris, and Adam R. Winstock. "Rates and correlates of cannabis-associated psychotic symptoms in over 230,000 people who use cannabis." Translational psychiatry 12, no. 1 (2022): 1-8.	Observational study	Wordwide		Cannabis-associated psychosis-like symptoms	Single item (have you ever sought emergency medical treatment [for hallucinations or paranoia] following your use of cannabis?)	Use of ketamine	-0.3 (-0.521; -0.079)	0.007757	59655
	Schoeler et al. (2022)	Schoeler, Tabea, Jason Ferris, and Adam R. Winstock. "Rates and correlates of cannabis-associated psychotic symptoms in over 230,000 people who use cannabis." Translational psychiatry 12, no. 1 (2022): 1-8.	Observational study	Wordwide		Cannabis-associated psychosis-like symptoms	Single item (have you ever sought emergency medical treatment [for hallucinations or paranoia] following your use of cannabis?)	Use of hallucinogens	-0.13 (-0.301; 0.041)	0.1373	80127
	Schoeler et al. (2022)	Schoeler, Tabea, Jason Ferris, and Adam R. Winstock. "Rates and correlates of cannabis-associated psychotic symptoms in over 230,000 people who use cannabis." Translational psychiatry 12, no. 1 (2022): 1-8.	Observational study	Wordwide		Cannabis-associated psychosis-like symptoms	Single item (have you ever sought emergency medical treatment [for hallucinations or paranoia] following your use of cannabis?)	Depression liability	0.545 (0.382; 0.709)	5.903e-11	117166
	Schoeler et al. (2022)	Schoeler, Tabea, Jason Ferris, and Adam R. Winstock. "Rates and correlates of cannabis-associated psychotic symptoms in over 230,000 people who use cannabis." Translational psychiatry 12, no. 1 (2022): 1-8.	Observational study	Wordwide		Cannabis-associated psychosis-like symptoms	Single item (have you ever sought emergency medical treatment [for hallucinations or paranoia] following your use of cannabis?)	Anxiety liability	0.481 (0.291; 0.672)	7.05e-07	110845
	Schoeler et al. (2022)	Schoeler, Tabea, Jason Ferris, and Adam R. Winstock. "Rates and correlates of cannabis-associated psychotic symptoms in over 230,000 people who use cannabis." Translational psychiatry 12, no. 1 (2022): 1-8.	Observational study	Wordwide		Cannabis-associated psychosis-like symptoms	Single item (have you ever sought emergency medical treatment [for hallucinations or paranoia] following your use of cannabis?)	Bipolar liability	0.806 (0.517; 1.095)	4.63e-08	98338
	Schoeler et al. (2022)	Schoeler, Tabea, Jason Ferris, and Adam R. Winstock. "Rates and correlates of cannabis-associated psychotic symptoms in over 230,000 people who use cannabis." Translational psychiatry 12, no. 1 (2022): 1-8.	Observational study	Wordwide		Cannabis-associated psychosis-like symptoms	Single item (have you ever sought emergency medical treatment [for hallucinations or paranoia] following your use of cannabis?)	Psychosis liability	1.464 (1.22; 1.708)	7.174e-32	96672
	Schoeler et al. (2022)	Schoeler, Tabea, Jason Ferris, and Adam R. Winstock. "Rates and correlates of cannabis-associated psychotic symptoms in over 230,000 people who use cannabis." Translational psychiatry 12, no. 1 (2022): 1-8.	Observational study	Wordwide		Cannabis-associated psychosis-like symptoms	Single item (have you ever sought emergency medical treatment [for hallucinations or paranoia] following your use of cannabis?)	ADHD	0.43 (0.124; 0.737)	0.005893	100574
	Rup et al. (2022)	Rup, Jennifer, Tom P. Freeman, Chris Perlman, and David Hammond. "Cannabis and Mental Health: Adverse Outcomes and Self-Reported Impact of Cannabis Use by Mental Health Status." Substance Use & Misuse 57, no. 5 (2022): 719-729.	Observational study	Canada/US	21.4	Cannabis-associated hallucinations	Single item (in the past 12 months, did you seek medical help for any adverse or negative health effects? (hallucinations))	Anxiety liability	-0.41 (-0.926; 0.105)	0.1187	75
	Rup et al. (2022)	Rup, Jennifer, Tom P. Freeman, Chris Perlman, and David Hammond. "Cannabis and Mental Health: Adverse Outcomes and Self-Reported Impact of Cannabis Use by Mental Health Status." Substance Use & Misuse 57, no. 5 (2022): 719-729.	Observational study	Canada/US	21.4	Cannabis-associated hallucinations	Single item (in the past 12 months, did you seek medical help for any adverse or negative health effects? (hallucinations))	Depression liability	-0.366 (-0.875; 0.142)	0.1578	76
	Rup et al. (2022)	Rup, Jennifer, Tom P. Freeman, Chris Perlman, and David Hammond. "Cannabis and Mental Health: Adverse Outcomes and Self-Reported Impact of Cannabis Use by Mental Health Status." Substance Use & Misuse 57, no. 5 (2022): 719-729.	Observational study	Canada/US	21.4	Cannabis-associated hallucinations	Single item (in the past 12 months, did you seek medical help for any adverse or negative health effects? (hallucinations))	Anxiety liability	0.774 (0.203; 1.345)	0.00784	76
	Rup et al. (2022)	Rup, Jennifer, Tom P. Freeman, Chris Perlman, and David Hammond. "Cannabis and Mental Health: Adverse Outcomes and Self-Reported Impact of Cannabis Use by Mental Health Status." Substance Use & Misuse 57, no. 5 (2022): 719-729.	Observational study	Canada/US	21.4	Cannabis-associated hallucinations	Single item (in the past 12 months, did you seek medical help for any adverse or negative health effects? (hallucinations))	Bipolar liability	0.774 (0.203; 1.345)	0.00784	76
	Rup et al. (2022)	Rup, Jennifer, Tom P. Freeman, Chris Perlman, and David Hammond. "Cannabis and Mental Health: Adverse Outcomes and Self-Reported Impact of Cannabis Use by Mental Health Status." Substance Use & Misuse 57, no. 5 (2022): 719-729.	Observational study	Canada/US	21.4	Cannabis-associated hallucinations	Single item (in the past 12 months, did you seek medical help for any adverse or negative health effects? (hallucinations))	Psychosis liability	0.978 (0.352; 1.603)	0.002182	75
	Peters et al. (2022)	Peters, Erica N., Irina Mosesova, Laura MacNair, Ryan Vandrey, M. Hunter Land, Mark A. Ware, Cynthia Turcotte, and Marcel O. Bonn-Miller. "Safety, Pharmacokinetics and Pharmacodynamics of Spectrum Red Softgels in Healthy Participants." Journal of Analytical Toxicology 46, no. 5 (2022): 528-539.	Medicinal cannabis study	Australia	28.1	Cannabis-associated paranoia	Adverse effects of medicinal cannabis (paranoia)	Medicinal cannabis (placebo controlled)	0.425 (-0.209; 1.059)	0.1963	41
	Gibson et al. (2021)	Gibson, Laurel P., Hollis C. Karoly, Jarrod M. Ellingson, Jost Klawitter, Cristina Sempio, Julia E. Squeri, Angela D. Bryan, L. Cinnamon Bidwell, and Kent E. Hutchison. "Effects of cannabidiol in cannabis flower: implications for harm reduction." Addiction Biology 27, no. 1 (2022): e13092.	Experiment	US	36	Cannabis-associated psychosis-like symptoms	POMS	CBD (administration)	-0.354 (-0.68; -0.027)	0.03527	159
	Gibson et al. (2021)	Gibson, Laurel P., Hollis C. Karoly, Jarrod M. Ellingson, Jost Klawitter, Cristina Sempio, Julia E. Squeri, Angela D. Bryan, L. Cinnamon Bidwell, and Kent E. Hutchison. "Effects of cannabidiol in cannabis flower: implications for harm reduction." Addiction Biology 27, no. 1 (2022): e13092.	Experiment	US	36	Cannabis-associated psychosis-like symptoms	POMS	THC placma level	-0.04 (-0.352; 0.272)	0.8018	159
	Drennan et al. (2021)	Drennan, M. L., H. C. Karoly, A. D. Bryan, K. E. Hutchison, and L. C. Bidwell. "Acute objective and subjective intoxication effects of legal-market high potency THC-dominant versus CBD-dominant cannabis concentrates." Scientific reports 11, no. 1 (2021): 1-10.	Experiment	US	29.8	Cannabis-associated paranoia	POMS	Cannabis strain (high in CBD)	-0.55 (-1.104; 0.004)	0.05	54
	Carlyle et al. (2021)	Carlyle, Molly, Toby Constable, Zoe C. Walter, Joanna Wilson, Grace Newland, and Leanne Hides. "Cannabis-induced dysphoria/paranoia mediates the link between childhood trauma and psychotic-like experiences in young cannabis users." Schizophrenia Research 238 (2021): 178-184.	Observational study	Australia	19.24	Cannabis-associated paranoia	CEQ (paranoid-dysphoric subscale)	Other (Childhood trauma)	0.366 (0.279; 0.453)	3.335e-16	2090
	Carlyle et al. (2021)	Carlyle, Molly, Toby Constable, Zoe C. Walter, Joanna Wilson, Grace Newland, and Leanne Hides. "Cannabis-induced dysphoria/paranoia mediates the link between childhood trauma and psychotic-like experiences in young cannabis users." Schizophrenia Research 238 (2021): 178-184.	Observational study	Australia	19.24	Cannabis-associated paranoia	CEQ (paranoid-dysphoric subscale)	Age	-0.1 (-0.186; -0.014)	0.0224	2090
	Carlyle et al. (2021)	Carlyle, Molly, Toby Constable, Zoe C. Walter, Joanna Wilson, Grace Newland, and Leanne Hides. "Cannabis-induced dysphoria/paranoia mediates the link between childhood trauma and psychotic-like experiences in young cannabis users." Schizophrenia Research 238 (2021): 178-184.	Observational study	Australia	19.24	Cannabis-associated paranoia	CEQ (paranoid-dysphoric subscale)	Other (Indigenous Status )	0.02 (-0.066; 0.106)	0.6477	2090
	Carlyle et al. (2021)	Carlyle, Molly, Toby Constable, Zoe C. Walter, Joanna Wilson, Grace Newland, and Leanne Hides. "Cannabis-induced dysphoria/paranoia mediates the link between childhood trauma and psychotic-like experiences in young cannabis users." Schizophrenia Research 238 (2021): 178-184.	Observational study	Australia	19.24	Cannabis-associated paranoia	CEQ (paranoid-dysphoric subscale)	Anxiety liability	1.186 (1.086; 1.286)	0	2090
	Carlyle et al. (2021)	Carlyle, Molly, Toby Constable, Zoe C. Walter, Joanna Wilson, Grace Newland, and Leanne Hides. "Cannabis-induced dysphoria/paranoia mediates the link between childhood trauma and psychotic-like experiences in young cannabis users." Schizophrenia Research 238 (2021): 178-184.	Observational study	Australia	19.24	Cannabis-associated paranoia	CEQ (paranoid-dysphoric subscale)	Depression liability	1.186 (1.086; 1.286)	0	2090
	Carlyle et al. (2021)	Carlyle, Molly, Toby Constable, Zoe C. Walter, Joanna Wilson, Grace Newland, and Leanne Hides. "Cannabis-induced dysphoria/paranoia mediates the link between childhood trauma and psychotic-like experiences in young cannabis users." Schizophrenia Research 238 (2021): 178-184.	Observational study	Australia	19.24	Cannabis-associated paranoia	CEQ (paranoid-dysphoric subscale)	MentalHealthLiability	0.181 (0.095; 0.267)	4.048e-05	2090
	Carlyle et al. (2021)	Carlyle, Molly, Toby Constable, Zoe C. Walter, Joanna Wilson, Grace Newland, and Leanne Hides. "Cannabis-induced dysphoria/paranoia mediates the link between childhood trauma and psychotic-like experiences in young cannabis users." Schizophrenia Research 238 (2021): 178-184.	Observational study	Australia	19.24	Cannabis-associated paranoia	CEQ (paranoid-dysphoric subscale)	Addiction liability	0.242 (0.155; 0.328)	4.644e-08	2090
	Carlyle et al. (2021)	Carlyle, Molly, Toby Constable, Zoe C. Walter, Joanna Wilson, Grace Newland, and Leanne Hides. "Cannabis-induced dysphoria/paranoia mediates the link between childhood trauma and psychotic-like experiences in young cannabis users." Schizophrenia Research 238 (2021): 178-184.	Observational study	Australia	19.24	Cannabis-associated paranoia	CEQ (paranoid-dysphoric subscale)	Gender	-0.164 (-0.25; -0.078)	0.0001921	2090
	Sainz-Cort et al. (2021)	Sainz-Cort, Alberto, Daniel Jimenez-Garrido, Elena Muñoz-Marron, Raquel Viejo-Sobera, Joost Heeroma, and Jose Carlos Bouso. "Opposite Roles for Cannabidiol and δ-9-Tetrahydrocannabinol in Psychotomimetic Effects of Cannabis Extracts: A Naturalistic Controlled Study." Journal of Clinical Psychopharmacology 41, no. 5 (2021): 561-570.	Experiment	Spain	29.94	Cannabis-associated hallucinations	VAS (hearing voices)	Single dose THC (versus placebo)	0.422 (-0.06; 0.904)	0.08635	18
	Sainz-Cort et al. (2021)	Sainz-Cort, Alberto, Daniel Jimenez-Garrido, Elena Muñoz-Marron, Raquel Viejo-Sobera, Joost Heeroma, and Jose Carlos Bouso. "Opposite Roles for Cannabidiol and δ-9-Tetrahydrocannabinol in Psychotomimetic Effects of Cannabis Extracts: A Naturalistic Controlled Study." Journal of Clinical Psychopharmacology 41, no. 5 (2021): 561-570.	Experiment	Spain	29.94	Cannabis-associated paranoia	VAS (suspicious)	Single dose THC (versus placebo)	0.532 (0.039; 1.026)	0.03455	18
	Sainz-Cort et al. (2021)	Sainz-Cort, Alberto, Daniel Jimenez-Garrido, Elena Muñoz-Marron, Raquel Viejo-Sobera, Joost Heeroma, and Jose Carlos Bouso. "Opposite Roles for Cannabidiol and δ-9-Tetrahydrocannabinol in Psychotomimetic Effects of Cannabis Extracts: A Naturalistic Controlled Study." Journal of Clinical Psychopharmacology 41, no. 5 (2021): 561-570.	Experiment	Spain	29.94	Cannabis-associated paranoia	PSI (paranoia)	Single dose THC (versus placebo)	0.863 (0.321; 1.404)	0.001782	18
	Sainz-Cort et al. (2021)	Sainz-Cort, Alberto, Daniel Jimenez-Garrido, Elena Muñoz-Marron, Raquel Viejo-Sobera, Joost Heeroma, and Jose Carlos Bouso. "Opposite Roles for Cannabidiol and δ-9-Tetrahydrocannabinol in Psychotomimetic Effects of Cannabis Extracts: A Naturalistic Controlled Study." Journal of Clinical Psychopharmacology 41, no. 5 (2021): 561-570.	Experiment	Spain	29.94	Cannabis-associated delusions	PSI (delusions)	Single dose THC (versus placebo)	0.484 (-0.004; 0.972)	0.05209	18
	Sainz-Cort et al. (2021)	Sainz-Cort, Alberto, Daniel Jimenez-Garrido, Elena Muñoz-Marron, Raquel Viejo-Sobera, Joost Heeroma, and Jose Carlos Bouso. "Opposite Roles for Cannabidiol and δ-9-Tetrahydrocannabinol in Psychotomimetic Effects of Cannabis Extracts: A Naturalistic Controlled Study." Journal of Clinical Psychopharmacology 41, no. 5 (2021): 561-570.	Experiment	Spain	29.94	Cannabis-associated hallucinations	VAS (hearing voices)	CBD (administration)	-0.423 (-0.906; 0.059)	0.08535	18
	Sainz-Cort et al. (2021)	Sainz-Cort, Alberto, Daniel Jimenez-Garrido, Elena Muñoz-Marron, Raquel Viejo-Sobera, Joost Heeroma, and Jose Carlos Bouso. "Opposite Roles for Cannabidiol and δ-9-Tetrahydrocannabinol in Psychotomimetic Effects of Cannabis Extracts: A Naturalistic Controlled Study." Journal of Clinical Psychopharmacology 41, no. 5 (2021): 561-570.	Experiment	Spain	29.94	Cannabis-associated paranoia	VAS (suspicious)	CBD (administration)	-0.54 (-1.034; -0.045)	0.03242	18
	Sainz-Cort et al. (2021)	Sainz-Cort, Alberto, Daniel Jimenez-Garrido, Elena Muñoz-Marron, Raquel Viejo-Sobera, Joost Heeroma, and Jose Carlos Bouso. "Opposite Roles for Cannabidiol and δ-9-Tetrahydrocannabinol in Psychotomimetic Effects of Cannabis Extracts: A Naturalistic Controlled Study." Journal of Clinical Psychopharmacology 41, no. 5 (2021): 561-570.	Experiment	Spain	29.94	Cannabis-associated paranoia	PSI (paranoia)	CBD (administration)	-0.52 (-1.013; -0.028)	0.03828	18
	Sainz-Cort et al. (2021)	Sainz-Cort, Alberto, Daniel Jimenez-Garrido, Elena Muñoz-Marron, Raquel Viejo-Sobera, Joost Heeroma, and Jose Carlos Bouso. "Opposite Roles for Cannabidiol and δ-9-Tetrahydrocannabinol in Psychotomimetic Effects of Cannabis Extracts: A Naturalistic Controlled Study." Journal of Clinical Psychopharmacology 41, no. 5 (2021): 561-570.	Experiment	Spain	29.94	Cannabis-associated delusions	PSI (delusions)	CBD (administration)	-0.359 (-0.835; 0.118)	0.14	18
	Bloomfield et al. (2021)	Bloomfield, Michael AP, Katherine Petrilli, Rachel Lees, Chandni Hindocha, Katherine Beck, Ryan J. Turner, Ellis Chika Onwordi et al. "The effects of acute Δ9-tetrahydrocannabinol on striatal glutamatergic function: A proton magnetic resonance spectroscopy study." Biological Psychiatry: Cognitive Neuroscience and Neuroimaging 6, no. 6 (2021): 660-667.	Experiment	UK	23.5	Cannabis-associated psychosis-like symptoms	PSI	Single dose THC (versus placebo)	0.798 (0.272; 1.324)	0.004263	60
	Walsh et al. (2021)	Walsh, Jennifer H., Kathleen J. Maddison, Tim Rankin, Kevin Murray, Nigel McArdle, Melissa J. Ree, David R. Hillman, and Peter R. Eastwood. "Treating insomnia symptoms with medicinal cannabis: a randomized, crossover trial of the efficacy of a cannabinoid medicine compared with placebo." Sleep 44, no. 11 (2021): zsab149.	Medicinal cannabis study	Australia	53	Cannabis-associated hallucinations	Adverse effects of medicinal cannabis (hallucinations)	Medicinal cannabis (placebo controlled)	0.237 (-0.231; 0.706)	0.3241	72
	Stith et al. (2023)	Stith, Sarah See, Xiaoxue Li, Franco Brockelman, Keenan Keeling, Branden Hall, and Jacob Miguel Vigil. "Understanding Feeling" High" and Its Role in Medical Cannabis Patient Outcomes." Frontiers in Pharmacology 14: 1380.	Medicinal cannabis study	US		Cannabis-associated paranoia	Adverse effects of medicinal cannabis (paranoia)	Subjective high	0.146 (0.056; 0.236)	0.0016	1882
	Lawn et al. (2023)	Lawn, W., Trinci, K., Mokrysz, C., Borissova, A., Ofori, S., Petrilli, K., Bloomfield, M., Haniff, Z.R., Hall, D., Fernandez‐Vinson, N. and Wang, S., 2023. The acute effects of cannabis with and without cannabidiol in adults and adolescents: A randomised, double‐blind, placebo‐controlled, crossover experiment. Addiction.	Experiment	UK	22.47	Cannabis-associated psychosis-like symptoms	PSI	Single dose THC (versus placebo)	0.632 (0.322; 0.942)	6.441e-05	48
	Lawn et al. (2023)	Lawn, W., Trinci, K., Mokrysz, C., Borissova, A., Ofori, S., Petrilli, K., Bloomfield, M., Haniff, Z.R., Hall, D., Fernandez‐Vinson, N. and Wang, S., 2023. The acute effects of cannabis with and without cannabidiol in adults and adolescents: A randomised, double‐blind, placebo‐controlled, crossover experiment. Addiction.	Experiment	UK	22.47	Cannabis-associated psychosis-like symptoms	PANSS positive	Single dose THC (versus placebo)	0.914 (0.577; 1.251)	1.042e-07	48
	Lawn et al. (2023)	Lawn, W., Trinci, K., Mokrysz, C., Borissova, A., Ofori, S., Petrilli, K., Bloomfield, M., Haniff, Z.R., Hall, D., Fernandez‐Vinson, N. and Wang, S., 2023. The acute effects of cannabis with and without cannabidiol in adults and adolescents: A randomised, double‐blind, placebo‐controlled, crossover experiment. Addiction.	Experiment	UK	22.47	Cannabis-associated paranoia	PSI (paranoia subscale)	Single dose THC (versus placebo)	0.238 (-0.049; 0.525)	0.1036	48
	Lawn et al. (2023)	Lawn, W., Trinci, K., Mokrysz, C., Borissova, A., Ofori, S., Petrilli, K., Bloomfield, M., Haniff, Z.R., Hall, D., Fernandez‐Vinson, N. and Wang, S., 2023. The acute effects of cannabis with and without cannabidiol in adults and adolescents: A randomised, double‐blind, placebo‐controlled, crossover experiment. Addiction.	Experiment	UK	22.47	Cannabis-associated delusions	PSI (delusions subscale)	Single dose THC (versus placebo)	0.158 (-0.127; 0.442)	0.2773	48
	Lawn et al. (2023)	Lawn, W., Trinci, K., Mokrysz, C., Borissova, A., Ofori, S., Petrilli, K., Bloomfield, M., Haniff, Z.R., Hall, D., Fernandez‐Vinson, N. and Wang, S., 2023. The acute effects of cannabis with and without cannabidiol in adults and adolescents: A randomised, double‐blind, placebo‐controlled, crossover experiment. Addiction.	Experiment	UK	22.47	Cannabis-associated psychosis-like symptoms	PSI	CBD (administration)	0.252 (-0.036; 0.539)	0.08589	48
	Lawn et al. (2023)	Lawn, W., Trinci, K., Mokrysz, C., Borissova, A., Ofori, S., Petrilli, K., Bloomfield, M., Haniff, Z.R., Hall, D., Fernandez‐Vinson, N. and Wang, S., 2023. The acute effects of cannabis with and without cannabidiol in adults and adolescents: A randomised, double‐blind, placebo‐controlled, crossover experiment. Addiction.	Experiment	UK	22.47	Cannabis-associated psychosis-like symptoms	PANSS positive	CBD (administration)	0.249 (-0.038; 0.537)	0.08892	48
	Lawn et al. (2023)	Lawn, W., Trinci, K., Mokrysz, C., Borissova, A., Ofori, S., Petrilli, K., Bloomfield, M., Haniff, Z.R., Hall, D., Fernandez‐Vinson, N. and Wang, S., 2023. The acute effects of cannabis with and without cannabidiol in adults and adolescents: A randomised, double‐blind, placebo‐controlled, crossover experiment. Addiction.	Experiment	UK	22.47	Cannabis-associated paranoia	PSI (paranoia subscale)	CBD (administration)	0.178 (-0.108; 0.463)	0.2223	48
	Lawn et al. (2023)	Lawn, W., Trinci, K., Mokrysz, C., Borissova, A., Ofori, S., Petrilli, K., Bloomfield, M., Haniff, Z.R., Hall, D., Fernandez‐Vinson, N. and Wang, S., 2023. The acute effects of cannabis with and without cannabidiol in adults and adolescents: A randomised, double‐blind, placebo‐controlled, crossover experiment. Addiction.	Experiment	UK	22.47	Cannabis-associated delusions	PSI (delusions subscale)	CBD (administration)	0.112 (-0.171; 0.396)	0.4378	48
	Lawn et al. (2023)	Lawn, W., Trinci, K., Mokrysz, C., Borissova, A., Ofori, S., Petrilli, K., Bloomfield, M., Haniff, Z.R., Hall, D., Fernandez‐Vinson, N. and Wang, S., 2023. The acute effects of cannabis with and without cannabidiol in adults and adolescents: A randomised, double‐blind, placebo‐controlled, crossover experiment. Addiction.	Experiment	UK	22.47	Cannabis-associated paranoia	PSI	Age	0.279 (-0.29; 0.847)	0.3417	48
	Schnell et al. (2023)	Schnell, Thomas, Christina-Marie Grömm, and Nils Klöckner. "Predictive impact of different acute cannabis intoxication effects with regard to abstinence motivation and cessation of use." Scientific reports 13, no. 1 (2023): 709.	Observational study	Germany	24.24	Cannabis-associated paranoia	CanTox-17	Other (Efforts to remain abstinent)	0.566 (0.376; 0.756)	1.089e-08	441
	Schnell et al. (2023)	Schnell, Thomas, Christina-Marie Grömm, and Nils Klöckner. "Predictive impact of different acute cannabis intoxication effects with regard to abstinence motivation and cessation of use." Scientific reports 13, no. 1 (2023): 709.	Observational study	Germany	24.24	Cannabis-associated psychosis-like symptoms	CanTox-17	Other (Awareness of problem)	0.275 (0.087; 0.463)	0.004247	441
	Schnell et al. (2023)	Schnell, Thomas, Christina-Marie Grömm, and Nils Klöckner. "Predictive impact of different acute cannabis intoxication effects with regard to abstinence motivation and cessation of use." Scientific reports 13, no. 1 (2023): 709.	Observational study	Germany	24.24	Cannabis-associated paranoia	CanTox-17	Other (Awareness of problem)	0.395 (0.206; 0.583)	4.787e-05	441
	Schnell et al. (2023)	Schnell, Thomas, Christina-Marie Grömm, and Nils Klöckner. "Predictive impact of different acute cannabis intoxication effects with regard to abstinence motivation and cessation of use." Scientific reports 13, no. 1 (2023): 709.	Observational study	Germany	24.24	Cannabis-associated paranoia	CanTox-17	Other (Ambivalence about becoming abstinent)	0.296 (0.108; 0.483)	0.002149	441
	Schnell et al. (2023)	Schnell, Thomas, Christina-Marie Grömm, and Nils Klöckner. "Predictive impact of different acute cannabis intoxication effects with regard to abstinence motivation and cessation of use." Scientific reports 13, no. 1 (2023): 709.	Observational study	Germany	24.24	Cannabis-associated paranoia	CanTox-17	Other (Intention to quit)	0.596 (0.376; 0.816)	1.958e-07	336
	Schnell et al. (2023)	Schnell, Thomas, Christina-Marie Grömm, and Nils Klöckner. "Predictive impact of different acute cannabis intoxication effects with regard to abstinence motivation and cessation of use." Scientific reports 13, no. 1 (2023): 709.	Observational study	Germany	24.24	Cannabis-associated psychosis-like symptoms	CanTox-17	Other (Intention to quit)	0.247 (0.031; 0.463)	0.02539	336
	Englund et al. (2023)	Englund, Amir, Dominic Oliver, Edward Chesney, Lucy Chester, Jack Wilson, Simina Sovi, Andrea De Micheli et al. "Does cannabidiol make cannabis safer? A randomised, double-blind, cross-over trial of cannabis with four different CBD: THC ratios." Neuropsychopharmacology 48, no. 6 (2023): 869-876.	Experiment	UK	26.6	Cannabis-associated psychosis-like symptoms	PANSS	CBD (administration)	-0.121 (-0.411; 0.169)	0.4138	46
	Englund et al. (2023)	Englund, Amir, Dominic Oliver, Edward Chesney, Lucy Chester, Jack Wilson, Simina Sovi, Andrea De Micheli et al. "Does cannabidiol make cannabis safer? A randomised, double-blind, cross-over trial of cannabis with four different CBD: THC ratios." Neuropsychopharmacology 48, no. 6 (2023): 869-876.	Experiment	UK	26.6	Cannabis-associated paranoia	SSPS	CBD (administration)	-0.127 (-0.417; 0.163)	0.3906	46
	Englund et al. (2023)	Englund, Amir, Dominic Oliver, Edward Chesney, Lucy Chester, Jack Wilson, Simina Sovi, Andrea De Micheli et al. "Does cannabidiol make cannabis safer? A randomised, double-blind, cross-over trial of cannabis with four different CBD: THC ratios." Neuropsychopharmacology 48, no. 6 (2023): 869-876.	Experiment	UK	26.6	Cannabis-associated psychosis-like symptoms	CAPE	CBD (administration)	0.147 (-0.143; 0.438)	0.321	46
	Englund et al. (2023)	Englund, Amir, Dominic Oliver, Edward Chesney, Lucy Chester, Jack Wilson, Simina Sovi, Andrea De Micheli et al. "Does cannabidiol make cannabis safer? A randomised, double-blind, cross-over trial of cannabis with four different CBD: THC ratios." Neuropsychopharmacology 48, no. 6 (2023): 869-876.	Experiment	UK	26.6	Cannabis-associated psychosis-like symptoms	PSI	CBD (administration)	0.171 (-0.12; 0.462)	0.25	46
	Johnson et al. (2023)	Johnson, Emma C., Sarah MC Colbert, Paul W. Jeffries, Rebecca Tillman, Tim B. Bigdeli, Nicole R. Karcher, Grace Chan et al. "Associations between cannabis use, polygenic liability for schizophrenia, and cannabis-related experiences in a sample of cannabis users." Schizophrenia bulletin 49, no. 3 (2023): 778-787.	Observational study	US	32.4	Cannabis-associated psychosis-like symptoms	SSAGA	Age of onset (cannabis use)	-0.243 (-0.3; -0.186)	6.288e-17	4832
	Johnson et al. (2023)	Johnson, Emma C., Sarah MC Colbert, Paul W. Jeffries, Rebecca Tillman, Tim B. Bigdeli, Nicole R. Karcher, Grace Chan et al. "Associations between cannabis use, polygenic liability for schizophrenia, and cannabis-related experiences in a sample of cannabis users." Schizophrenia bulletin 49, no. 3 (2023): 778-787.	Observational study	US	32.4	Cannabis-associated hallucinations	SSAGA	Age of onset (cannabis use)	-0.167 (-0.255; -0.079)	0.0001978	4832
	Johnson et al. (2023)	Johnson, Emma C., Sarah MC Colbert, Paul W. Jeffries, Rebecca Tillman, Tim B. Bigdeli, Nicole R. Karcher, Grace Chan et al. "Associations between cannabis use, polygenic liability for schizophrenia, and cannabis-related experiences in a sample of cannabis users." Schizophrenia bulletin 49, no. 3 (2023): 778-787.	Observational study	US	32.4	Cannabis-associated paranoia	SSAGA	Age of onset (cannabis use)	-0.186 (-0.26; -0.112)	9.744e-07	4832
	Johnson et al. (2023)	Johnson, Emma C., Sarah MC Colbert, Paul W. Jeffries, Rebecca Tillman, Tim B. Bigdeli, Nicole R. Karcher, Grace Chan et al. "Associations between cannabis use, polygenic liability for schizophrenia, and cannabis-related experiences in a sample of cannabis users." Schizophrenia bulletin 49, no. 3 (2023): 778-787.	Observational study	US	32.4	Cannabis-associated psychosis-like symptoms	SSAGA	Duration of cannabis use	0.177 (0.121; 0.234)	9.428e-10	4832
	Johnson et al. (2023)	Johnson, Emma C., Sarah MC Colbert, Paul W. Jeffries, Rebecca Tillman, Tim B. Bigdeli, Nicole R. Karcher, Grace Chan et al. "Associations between cannabis use, polygenic liability for schizophrenia, and cannabis-related experiences in a sample of cannabis users." Schizophrenia bulletin 49, no. 3 (2023): 778-787.	Observational study	US	32.4	Cannabis-associated hallucinations	SSAGA	Duration of cannabis use	-0.001 (-0.089; 0.087)	0.984	4832
	Johnson et al. (2023)	Johnson, Emma C., Sarah MC Colbert, Paul W. Jeffries, Rebecca Tillman, Tim B. Bigdeli, Nicole R. Karcher, Grace Chan et al. "Associations between cannabis use, polygenic liability for schizophrenia, and cannabis-related experiences in a sample of cannabis users." Schizophrenia bulletin 49, no. 3 (2023): 778-787.	Observational study	US	32.4	Cannabis-associated paranoia	SSAGA	Duration of cannabis use	0.073 (-0.001; 0.148)	0.05234	4832
	Johnson et al. (2023)	Johnson, Emma C., Sarah MC Colbert, Paul W. Jeffries, Rebecca Tillman, Tim B. Bigdeli, Nicole R. Karcher, Grace Chan et al. "Associations between cannabis use, polygenic liability for schizophrenia, and cannabis-related experiences in a sample of cannabis users." Schizophrenia bulletin 49, no. 3 (2023): 778-787.	Observational study	US	32.4	Cannabis-associated psychosis-like symptoms	SSAGA	Severity of cannabis use	0.751 (0.693; 0.81)	2.822e-131	4832
	Johnson et al. (2023)	Johnson, Emma C., Sarah MC Colbert, Paul W. Jeffries, Rebecca Tillman, Tim B. Bigdeli, Nicole R. Karcher, Grace Chan et al. "Associations between cannabis use, polygenic liability for schizophrenia, and cannabis-related experiences in a sample of cannabis users." Schizophrenia bulletin 49, no. 3 (2023): 778-787.	Observational study	US	32.4	Cannabis-associated hallucinations	SSAGA	Severity of cannabis use	0.471 (0.383; 0.56)	2.449e-25	4832
	Johnson et al. (2023)	Johnson, Emma C., Sarah MC Colbert, Paul W. Jeffries, Rebecca Tillman, Tim B. Bigdeli, Nicole R. Karcher, Grace Chan et al. "Associations between cannabis use, polygenic liability for schizophrenia, and cannabis-related experiences in a sample of cannabis users." Schizophrenia bulletin 49, no. 3 (2023): 778-787.	Observational study	US	32.4	Cannabis-associated paranoia	SSAGA	Severity of cannabis use	0.489 (0.414; 0.564)	6.298e-37	4832
	Johnson et al. (2023)	Johnson, Emma C., Sarah MC Colbert, Paul W. Jeffries, Rebecca Tillman, Tim B. Bigdeli, Nicole R. Karcher, Grace Chan et al. "Associations between cannabis use, polygenic liability for schizophrenia, and cannabis-related experiences in a sample of cannabis users." Schizophrenia bulletin 49, no. 3 (2023): 778-787.	Observational study	US	32.4	Cannabis-associated psychosis-like symptoms	SSAGA	Psychosis liability	0.095 (0.038; 0.152)	0.001006	4832
	Johnson et al. (2023)	Johnson, Emma C., Sarah MC Colbert, Paul W. Jeffries, Rebecca Tillman, Tim B. Bigdeli, Nicole R. Karcher, Grace Chan et al. "Associations between cannabis use, polygenic liability for schizophrenia, and cannabis-related experiences in a sample of cannabis users." Schizophrenia bulletin 49, no. 3 (2023): 778-787.	Observational study	US	32.4	Cannabis-associated hallucinations	SSAGA	Psychosis liability	0.032 (-0.055; 0.12)	0.4702	4832
	Johnson et al. (2023)	Johnson, Emma C., Sarah MC Colbert, Paul W. Jeffries, Rebecca Tillman, Tim B. Bigdeli, Nicole R. Karcher, Grace Chan et al. "Associations between cannabis use, polygenic liability for schizophrenia, and cannabis-related experiences in a sample of cannabis users." Schizophrenia bulletin 49, no. 3 (2023): 778-787.	Observational study	US	32.4	Cannabis-associated paranoia	SSAGA	Psychosis liability	0.129 (0.054; 0.203)	0.0006947	4832

## Sheet: Table 5
	Table 5. Summary of meta-analytical models assessing predictors of cannabis-associated psychotic symptoms
	Category	Factor	Pooled Cohen's d	p-value (Cohen's d)	Model	Heterogeneity test (I2, p-value)	Number of included estimates	Number of included (non-overlapping) individuals
	Mental Health Personality	Addiction liability	0.259 (0.139; 0.379)	2.26196e-05	REM	7.931% (0.297)	2	2190
	Demographic	Age	-0.171 (-0.292; -0.051)	0.00526413	MREM	80.167% (2.4e-06)	13	153023
	Cannabis history	Age of onset (cannabis use)	-0.132 (-0.548; 0.284)	0.533801	MREM	97.767% (1.84e-09)	6	5345
	Mental Health Personality	Aggression (violent behaviour)	0 (-0.32; 0.32)	1	Aggregated		3	112
	Candidate gene	AKT1	0.019 (-0.146; 0.185)	0.818183	MREM	59.142% (0.0368)	4	1151
	Other drug use	Use of alcohol	0.051 (-0.401; 0.504)	0.824445	REM	86.532% (0.000661)	4	147068
	Mental Health Personality	Anxiety liability	0.439 (0.033; 0.844)	0.0339424	MREM	91.447% (8.71e-17)	7	113178
	Mental Health Personality	Bipolar liability	0.799 (0.542; 1.057)	1.22685e-09	REM	0% (0.922)	2	98414
	Cannabis history	Duration of cannabis use	0.077 (-0.013; 0.166)	0.0945073	MREM	75.91% (0.00344)	4	5301
	Cannabis history	Severity of cannabis use	0.138 (-0.25; 0.526)	0.48453	MREM	97.983% (4.44e-91)	16	155218
	Pharmaco-dynamic	CBD (administration)	-0.188 (-0.429; 0.053)	0.125424	MREM	72.059% (0.00105)	19	367
	Cannabis history	Cannabis strain (high in CBD)	-0.17 (-0.75; 0.41)	0.564901	MREM	90.511% (0.0142)	6	374
	Candidate gene	CNR1	-0.019 (-0.15; 0.112)	0.77718	Aggregated		5	541
	Other drug use	Use of cocaine	0.003 (-0.07; 0.076)	0.934379	MREM	1.907% (0.783)	4	91296
	Candidate gene	COMT	0.052 (-0.059; 0.163)	0.355721	REM	18.228% (0.355)	5	1356
	Other drug use	Use of crack	0.13 (0.033; 0.228)	0.00884008	Aggregated		2	1213
	Mental Health Personality	Depression liability	0.372 (0.003; 0.741)	0.0482007	MREM	92.897% (5.61e-30)	9	120119
	NS	Dopaminergic function	0.4 (0.16; 0.64)	0.00107076	REM	0% (0.609)	4	99
	Pharmaco-dynamic	Dose-response effects (THC)	0.418 (0.246; 0.591)	2.02736e-06	REM	36.499% (0.22)	3	369
	Demographic	Education	0.125 (-0.098; 0.347)	0.271803	REM	0% (0.324)	2	71693
	Demographic	Ethnic group	0 (-0.294; 0.294)	1	Aggregated		2	146
	Demographic	Gender	-0.091 (-0.18; -0.001)	0.0465835	MREM	63.963% (0.00308)	14	153208
	Other drug use	Use of hallucinogens	-0.047 (-0.143; 0.05)	0.344568	MREM	28.915% (0.334)	4	81376
	Demographic	General health status	0 (-0.294; 0.294)	1	Aggregated		2	146
	Other drug use	Use of inhalants	0.124 (0.026; 0.221)	0.0129251	Aggregated		2	1213
	Other drug use	Use of ketamine	-0.146 (-0.404; 0.112)	0.267894	MREM	85.265% (0.0685)	3	60868
	Other drug use	Use of MDMA	0.196 (0.034; 0.359)	0.0180546	REM	0% (0.486)	2	95632
	Pharmaco-dynamic	Medicinal cannabis (placebo controlled)	0.143 (0.052; 0.234)	0.00206752	MREM	18.056% (0.506)	26	1904
	Other drug use	Use of nicotine	0.032 (-0.271; 0.335)	0.837881	REM	84.564% (5.59e-07)	5	139880
	Other drug use	Use of new psychoactive substances	0.03 (-0.067; 0.128)	0.5406	Aggregated		2	1213
	NS	Opioidergic function	-0.187 (-0.48; 0.105)	0.209525	REM	11.215% (0.368)	3	123
	Other drug use	Use of opioids	-0.082 (-0.179; 0.016)	0.100037	Aggregated		2	1213
	Mental Health Personality	Personality	0.219 (-0.038; 0.475)	0.0950447	Aggregated		7	127
	Mental Health Personality	Psychosis liability	0.492 (0.213; 0.771)	0.000557056	MREM	95.401% (5.64e-38)	28	103450
	Cannabis history	Reason (medicinal vs. recreational)	0.208 (-0.246; 0.661)	0.36943	MREM	90.282% (7.37e-05)	3	148796
	Other drug use	Use of sedatives	0.122 (0.024; 0.22)	0.0142301	Aggregated		2	1213
	Demographic	Socioeconomic status	0 (-0.294; 0.294)	1	Aggregated		2	146
	Pharmaco-dynamic	Single dose THC (versus placebo)	0.695 (0.516; 0.873)	2.67545e-14	MREM	81.114% (7.07e-17)	64	917
	Other drug use	Use of stimulants	0.077 (-0.009; 0.163)	0.0807311	MREM	13.448% (0.365)	5	62367
	Pharmaco-dynamic	Subjective high	0.195 (-0.048; 0.438)	0.116475	MREM	13.488% (0.456)	3	1903
	Pharmaco-dynamic	THC-COOH levels	-0.217 (-0.385; -0.049)	0.0114542	Aggregated		4	346
	Cannabis history	Cannabis strain (high in THC)	0.038 (-0.13; 0.207)	0.655858	MREM	88.39% (8.83e-14)	9	62474
	Pharmaco-dynamic	THC placma level	-0.023 (-0.259; 0.213)	0.848887	MREM	0% (0.999)	4	172
	Pharmaco-dynamic	Tolerance	-0.299 (-0.657; 0.059)	0.101407	REM	73.799% (0.0115)	3	403
	NS = Neurotransmitter system
